# Supplementary material for: Correction: Insulin and diet-induced changes in the ubiquitin-modified proteome of rat liver
Source: PLoS One. 2017 Sep 8;12(9):e0184610. doi: 10.1371/journal.pone.0184610 (PMC5590999; doi:10.1371/journal.pone.0184610)
Supplement: S1 Table — (XLSX) [file pone.0184610.s001.xlsx]

## Sheet: Chow
Protein.IDs	Protein.names.CB	Gene.names	Unique.Peptides	Unique.Sequence.Coverage	Molecular.Weight.kDa	PEP
A0JPJ7;D3ZG25	Obg-like ATPase 1	Ola1	3	7.8	44.535	6.99e-09
B0BMS8;Q64122	Myosin regulatory light polypeptide 9	Myl9	4	21.5	19.854	1.43e-212
B0BMW0;P61107	Ras-related protein Rab-14	Rab14	4	31.6	23.897	2.08e-53
B0BN81;P24050	40S ribosomal protein S5;40S ribosomal protein S5, N-terminally processed	Rps5	12	49.5	22.906	9.17e-85
B0BN93	26S proteasome non-ATPase regulatory subunit 13	Psmd13	12	38	42.817	2.88e-103
B0BNA7;F1LR46;F1LUP5	Eukaryotic translation initiation factor 3 subunit I	Eif3i	7	20.9	36.46	1.13e-27
B0BNE5	S-formylglutathione hydrolase	Esd	5	15.2	31.363	1.38e-17
B0BNF9		Hao1	8	27.6	40.968	1e-50
B0K031;P05426;F1M6K0;F1M087;D4A1F7;Q7TP62;D4A4I8;F1LTQ3;F1M1V2;F1LXU1;F1LUE9;F1LWQ5;F1LV62	60S ribosomal protein L7	Rpl7	27	60.4	30.313	2.08e-153
B1H249		Gnpnat1	2	15.8	20.821	1.12e-52
B1H267	Sorting nexin-5	Snx5	4	14.1	46.793	6.51e-39
B1WBY7		Erlin1	2	7.5	39.266	1.58e-24
B1WC26		Nans	4	17.5	40.051	9.58e-42
B2GUV7;F1M3V8	Eukaryotic translation initiation factor 5B	Eif5b	4	6.7	137.68	5.33e-42
B2GUY2;D4A1F1	Transferrin receptor protein 2	Tfr2	5	6.5	88.327	1.81e-16
B2GUZ5;F8WFI5	F-actin-capping protein subunit alpha-1	Capza1	7	36.4	32.909	1.1e-115
B2GV15		Dbt	10	17.8	53.273	8.46e-37
B2GV38	Ubiquitin-like protein 4A	Ubl4a	7	47.8	17.79	2.4e-30
B2RYH2;D3ZBI1		Trim14	7	17.3	49.849	3.75e-26
B2RYI2;D3ZVL3		Srp68	13	30.9	70.491	2.32e-177
B2RYN3		Eef1e1	3	19.5	19.842	1.73e-32
B2RZ72		Arpc4	7	48.8	19.667	3.98e-60
B2RZA9;F1LTT5		Ube2l3	4	42.2	17.861	2.32e-109
B2RZD1		Sec61b	2	27.1	9.9884	1.6e-26
B2RZD4;D4A4W9;F1LQ14;P11250;D3ZHM1	60S ribosomal protein L34	Rpl34;Rpl34-ps1;RGD1561086	7	33.3	13.293	4.41e-20
B2RZD6		Ndufa4	5	47.6	9.3267	1.37e-16
B3DMA2;F1LYZ0	Acyl-CoA dehydrogenase family member 11	Acad11	16	20.2	87.37	8.62e-63
B5DEG8;F1LYY0;F1M7Y8		Sec24c	9	12.7	118.52	3.83e-52
B5DEM5;F1LSW7;Q63507;Q6TUH8;D3ZHE6;D3ZZY6	60S ribosomal protein L14	Rpl14;LOC306079;LOC680579	10	39.7	23.78	1.96e-43
B5DEN5;Q7TPK5		Eef1b2	3	16	24.675	3.79e-34
B5DF46		Pmm2	8	34.7	27.708	3.08e-29
B5DF65		LOC681468	4	25.2	22.094	3.67e-11
B5DFC3		Sec23a	13	24.1	86.161	0
B5DFC8;D3ZX16	Eukaryotic translation initiation factor 3 subunit C	Eif3c	10	12.4	105.43	7.7e-140
D3Z8I7		Gstt1	8	25.2	23.381	9.16e-207
D3Z8X6		Dtx3l	19	27.9	83.102	1.07e-125
D3Z905;G3V699;Q9Z2Q1;D4A5M5;Q9Z2Q1-2;D4ADQ9;D3Z9R0	Protein transport protein Sec31A	Sec31a	30	29.1	133.43	0
D3Z941		Mars	19	27.1	101.58	5.37e-124
D3Z982;Q6PDU1;F1LUT2	Serine/arginine-rich splicing factor 2	Srsf2	7	26.6	28.869	1.1e-137
D3Z9E1;D4A9Z4		Emilin1	6	11.3	94.504	2.37e-23
D3Z9M4;F1M651;F1M3K5;F1MA94;D3ZMF0;D3Z9Z0		Ank1	7	6	207.49	3.86e-55
D3ZAF6		Atp5j2	3	34.1	10.452	1.53e-07
D3ZAP2;C0JPT7;D3ZXX2		Flna	38	19.8	281.29	0
D3ZBA1;D3ZJP8;E9PSW4;E9PTJ9		Aox4	32	29.7	146.93	0
D3ZBW0;D4A2X2;Q05096;F1LSW1;D3ZC71;Q05096-2;D3ZNP7;Q05096-3	Unconventional myosin-Ib	Myo1b	20	21.3	132.02	5e-169
D3ZC88;P62630;F1M6C2;P62632;D3ZA96;D4A0X4	Elongation factor 1-alpha;Elongation factor 1-alpha 1	LOC100360413;Eef1a1	19	42.6	50.107	0
D3ZCS9		RGD1309350	5	34	16.01	1.69e-28
D3ZD13;D4A8D5;D3ZHA0;D3ZZ63		Flnb	61	32.1	277.84	0
D3ZD97		Dhx15	3	4.5	90.976	1.08e-15
D3ZDW1;D3ZIC2		Uroc1	15	22.4	78.533	1.3e-96
D3ZE37;P62282;D3ZYK5;D3ZMX7	40S ribosomal protein S11	Rps11	16	60.6	18.701	7.46e-90
D3ZE63;P30904;D4A3P7;F1LTZ6	Macrophage migration inhibitory factor	LOC686548;Mif;RGD1560513	3	23.5	12.605	1.94e-14
D3ZEZ9;F1M155;D3ZQS5		Svil	6	5	241.94	7.18e-27
D3ZF07;P18445;D3ZI60;D3ZG03;D4AAY6;D3ZUK0;F1M5H4;F1LVD0;D3ZVI3;F1LZW1	60S ribosomal protein L27a	RGD1562402;Rpl27a;RGD1561984	6	32.4	16.587	1.23e-25
D3ZF26		Tnks1bp1	16	14.5	180.01	3.95e-231
D3ZFA8;P04644;D3ZHU9;D3ZKG6;D3ZM01;F1M5B1;F1M238;D3ZL23	40S ribosomal protein S17	LOC100362366;Rps17;LOC100361180;RGD1559955	10	65.2	15.468	2.47e-144
D3ZFF9;D3ZUL6;G3V9U0;D3ZQ17		Acss2	7	12.3	80.583	6.22e-92
D3ZFJ6		Lactb	5	11.6	60.42	5.21e-22
D3ZFX4;B2RYN0;D3ZU02		Pgm3	9	20.7	60.845	7.02e-76
D3ZFY0		Sephs1	6	28.3	42.892	1.52e-35
D3ZGE6;D3ZRB0;Q66HL2		Cttn	18	39.7	61.077	1.77e-108
D3ZHR2		Abcd1	5	9.9	81.937	3.75e-21
D3ZHX7;D3Z8U7;F1LQB5;Q5M7W5;D3ZHY7;D3ZHX8;Q5M7W5-2	Microtubule-associated protein;Microtubule-associated protein 4	Map4	6	7.9	116.81	5.59e-33
D3ZHY1;Q5XHY5;D4ABM0;Q68FW7;F1LQP2;D3Z7Y7	Threonine--tRNA ligase, cytoplasmic	Tars	24	33	83.388	2.42e-299
D3ZI23;G3V9P0;Q9WTV5;D4A4H7	26S proteasome non-ATPase regulatory subunit 9	Psmd9	5	18	31.758	7.18e-21
D3ZIA3;F1LN56;Q99MZ8	LIM and SH3 domain protein 1	Lasp1	13	41.8	29.942	5.75e-111
D3ZJ95;Q7TQ70;P06399;P06399-2;F1M5M0	Fibrinogen alpha chain;Fibrinopeptide A;Fibrinogen alpha chain	Fga	32	39.2	86.846	0
D3ZJI3;Q6P799;D3ZJ61;D4A0E9	Serine--tRNA ligase, cytoplasmic	Sars	2	3.5	61.362	2.87e-05
D3ZJS0;P70580	Membrane-associated progesterone receptor component 1	Pgrmc1	8	28.4	24.694	1.59e-113
D3ZK05		Gsdmd	9	24.4	49.603	2.39e-70
D3ZK97;D3ZQN4;P84245;D3ZJ08;Q6LED0;D4A0P4;D3ZVW5;F1M7I7	Histone H3;Histone H3.3;Histone H3.1	LOC100360868;LOC100359421;H3f3b;Hist1h2ail;LOC691496	7	43.4	15.358	1.57e-16
D3ZKG9;F1M0Y0		RGD1307222	13	10.5	151.04	7.72e-152
D3ZL58;Q5XIT4		Nub1	4	10.3	70.296	1.85e-71
D3ZLI8;Q07984	Translocon-associated protein subunit delta	Ssr4	4	30.5	19.107	1.58e-13
D3ZLR7;D4ADT6;D4A8D9;D4ADT5		Ddx58	28	31	106.3	4.69e-173
D3ZNH4;F1LS18;D3ZWM5;G3V8B3;D4A817;Q00715;D4ABS3;D3ZLY9;D3Z8U0;G3V9C7;Q00729;F1LP73;D3ZNZ9;D3ZZP9	Histone H2B;Histone H2B type 1;Histone H2B type 1-A	Hist1h2bm;Hist1h2bl;LOC684647;LOC684797;LOC100359692;Hist1h2bd;Hist1h2bf;Hist1h2bc;Hist1h2ba;Hist3h2ba	12	58.7	15.493	3.16e-116
D3ZNQ6		Ube2m	2	10.4	20.9	4.13e-07
D3ZNU8;D4A678;Q6XDA1;REV__F1LLV5		Spta1	108	47.2	280.13	0
D3ZP30;F1LQI5;Q2TL32;D3ZZA2	E3 ubiquitin-protein ligase UBR4	Ubr4	13	3.3	575.56	1.59e-161
D3ZPN7;Q6PDW2;D4A4G9;D3ZMI8;D3ZXP5;D3ZZH9;D3Z9G3;D3ZEK2;D3ZUH0;D3ZEP1;P20280;F1LWH4;D4A7B4;D4A870;D3ZPH0;D3ZRA9;D3ZLH3;D4A219;D4A4G7;D3ZPU6;F1LY43;F1LVT4;D3ZE97;D3ZPV5;F1LV87;F1LXP6;D3ZIM9;F1LV39;D3ZKL4;D4A4U4;F1M5C7;D4A9T8;D3ZPB0;D3ZQD7;F1M361;F1M235;D3ZF08;D4A5A5;D3ZCN5;D3ZVH3;D3ZM68;F1M4U3;D3ZNN2	60S ribosomal protein L21	LOC100364176;LOC100360604;RGD1561815;RGD1562839;RGD1562469;LOC681195;LOC100361103;RGD1562923;LOC100363471;RGD1562971;Rpl21;LOC100360611;LOC686080;RGD1565370;RGD1560414;RGD1562601;RGD1565159;RGD1566270;LOC680639;RGD1564634;RGD1566326;RGD1562929	4	23.1	18.678	7.75e-86
D3ZPR0		Cse1l	9	9.5	110.21	1.98e-85
D3ZQX6;Q9EQS4		Cth	2	13.6	43.59	0
D3ZQY2			6	24	32.9	3.31e-18
D3ZR07;D3ZFD0;F1LM91;F1M5K8;F1LNC1;D3ZHN6			138	57.2	234.36	0
D3ZR68;D4AE06;D4A6E5	Peptidyl-prolyl cis-trans isomerase	Fkbp15	7	9.3	137.38	5.71e-97
D3ZRJ1;F1M7X1;P20817;D3ZNF2;D3ZMB7;D4A756;D4AB65;D3ZTC9;P24464;D3ZXY6	Cytochrome P450 4A14	Cyp4a2;Cyp4a14	3	9.9	58.465	1.31e-70
D3ZRV4;P04905;G3V983;D3ZGW4;D3ZVQ8;B0BN47	Glutathione S-transferase Mu 1	Gstm1	11	35.4	28.399	1.11e-138
D3ZS68;D4A1P3;Q6AY48;D3ZPF1;F1LU04;D3ZCS3;D3ZWQ9;F1M8T3		Pcbp1	7	30.3	37.497	1.04e-223
D3ZSD1;D4A6B2;Q3KR86;D3ZDF7;F1LRP0	Mitochondrial inner membrane protein	Immt	23	33.9	87.2	1.04e-173
D3ZT90		Gcdh	7	25.7	49.713	4.96e-152
D3ZTH8;F1LT35;P62752;D4AAL7;D3ZTX9;D3ZNM1;D3ZFK7;D3ZSR8;D4A9L3;F1M1E5;D4ADV3;D3Z969;D3ZIJ2	60S ribosomal protein L23a	LOC689899;RGD1564606;Rpl23a;LOC688776;RGD1565170;RGD1562755	10	44.2	17.753	1.17e-129
D3ZTP0;REV__D4A4I9		Aldh1l2	16	21.8	101.69	3.02e-119
D3ZU13;D4AD15		Eif4g1;LOC680559	9	6.4	175.7	2.91e-33
D3ZU22;P62425;F2Z3S2;D3ZPL5;D4A6B9;F1M2H8;D3ZJH5;D3ZWM2;F1M1M2;F1M2Q3;D4A8X2;F1M394;F1M4C7;D3ZNA3;F1M300;F1LYB8;F1LU72;F1M0S7;F1M0R8;F1M4Z6;D4A566;F1LZY4;D3ZD15;Q7TQ86;F1M465;D3ZVY2;F1LV49;D4A2J1;F1LT34;D4A479;D4A1S7;F1M3Q8;F1M843;F1LXH6;F1M289;D4AE05;D3ZEB2	60S ribosomal protein L7a	LOC100361311;Rpl7a;RGD1562953;LOC680161;RGD1562409;RGD1559149;RGD1563220;RGD1564370	14	34.6	30.011	1.32e-160
D3ZUM0;Q01579		Gstt1	12	47.3	27.598	1.3e-206
D3ZUU8		Sec14l4	7	20.4	47.018	1.9e-36
D3ZUY6;F1LM69;Q641Y0;D4AB95	Dolichyl-diphosphooligosaccharide--protein glycosyltransferase 48 kDa subunit	Ddost	4	9.5	48.555	2.16e-09
D3ZUY8;D3ZMB9		Ap2a1	4	5.2	107.67	2.64e-42
D3ZV82		LOC685067	6	13.1	71.252	1.37e-73
D3ZW08		Adsl	6	21.5	54.852	8.75e-68
D3ZW50;Q63448;F1M9A7;D4A3R1;REV__F1LW22;REV__F1M8V4	Acyl-coenzyme A oxidase;Peroxisomal acyl-coenzyme A oxidase 3	Acox3	18	32.3	78.569	2.93e-277
D3ZW55	Inosine triphosphate pyrophosphatase	Itpa	5	24.2	21.927	1.56e-20
D3ZW96;E9PTI1		Atp6v1h	4	12.2	55.868	3.41e-45
D3ZXH6;P24049;D3ZP66;D3Z9G9;D4AAE8;D4ACF0;Q7TPJ7;F1M302;F1LZX7;F1M5Y4	60S ribosomal protein L17	RGD1563903;Rpl17;RGD1562905;RGD1560017;RGD1565093	16	47.6	22.025	0
D3ZXY4		Aldh8a1	23	45.8	53.46	0
D3ZYU9;G3V9S9;D3ZTC8		Sec24d;Sec24d_predicted	4	5.7	113.16	5.09e-26
D3ZZ12;B5DFH4;F1M318		Papss2	34	44.9	69.956	0
D3ZZ55;D3ZZZ9;D4A493;D4ABK8		Ctnnd1	6	9.8	104.89	1.13e-25
D3ZZ95;P39032;D4A1Q0;F1M706;D3ZJJ6;D3Z7Z2;D3Z8V5;F1M9S4	60S ribosomal protein L36	LOC100361060;Rpl36;LOC100361079;LOC100360439;LOC100359616	7	39.6	12.41	2.33e-48
D3ZZB2;D3ZS45		Pex1	14	16.1	141.4	3.25e-171
D3ZZK1;P60868	40S ribosomal protein S20	LOC100359563;Rps20	7	37.8	13.354	8.39e-245
D3ZZN4;P04646;D3ZRV7;D4A771;F1M2L1;D4A329;D3ZYY1;F1M0T2;D3ZFY4	60S ribosomal protein L35a	LOC100362338;Rpl35a;LOC100359636;LOC100359825;RGD1560900	9	49.1	12.623	2.2e-27
D3ZZU0;P85970	Actin-related protein 2/3 complex subunit 2	Arpc2	9	30	34.347	3.89e-47
D4A137;D3ZIM4;D3ZJP0;G3V9W6;P30839;D4A387;P11883	Aldehyde dehydrogenase;Fatty aldehyde dehydrogenase	Aldh3a2	18	42.6	56.842	1.75e-203
D4A1Y4;D4A5T0;Q5XI21		Tom1	5	15.9	56.708	8.06e-24
D4A2K1		Hoga1	5	23.4	34.464	6.22e-74
D4A323;Q6S3A0;F1MAL6;D3ZF79;Q6S396;Q6S395;Q6S398;Q6S3A3;Q6S3A1;P30427;P30427-4;P30427-2;P30427-3	Plectin	Plec	108	27.8	534.37	0
D4A354;D3ZCI0;D3ZNG1;F1LSY6;Q63060;D3Z8F7;Q68FP7	Glycerol kinase	Gk	15	28.4	61.232	1.6e-109
D4A3E2		Npepl1	6	20.6	55.911	2.62e-124
D4A415		Fam175b	2	6.7	46.945	1.05e-09
D4A4D5;P02401;D3ZN03;D3ZMC4;D3ZMC5	60S acidic ribosomal protein P2	LOC498555;Rplp2;LOC100362751	8	81.7	11.706	6.35e-266
D4A4X4;F1M434		Cgn	24	25.3	136.4	0
D4A5I9;D3ZYX5;F1LWP6		Myo6	22	20	145.66	2.02e-154
D4A6S1;E9PSJ6;F1M668;F1M005		Grhpr	13	31.5	36.219	5.17e-68
D4A720;D3Z964;F1LZA3;F1M8R2		rCG_61762	6	25.6	27.377	9.75e-38
D4A746		Gmppb	5	19.7	39.902	4.21e-26
D4A7R0;B0BND9			7	15.9	75.002	1.33e-113
D4A8A0		Cad	13	8.8	243.47	6.72e-173
D4A8E3;Q3MID3	ADP-ribosylation factor GTPase-activating protein 2	Arfgap2	7	15.9	58.067	1.21e-25
D4A996;F1LRB4;D4ADD2;F1LXD4;D3ZM20		Kif13b	19	14.8	203.26	2.04e-205
D4A9A6;D4A2Q2;D3ZEZ7;D3ZIP3;D3ZKF7;D4A6Q4;D3ZHS9;D3ZL97;D3ZL93;D3ZMI4;Q9WTP0-2;Q9JMB3;D3ZU77;G3V874;D3ZB32;D3ZDI1;Q9WTP0;D4ACZ3;A3E0T0;D4A9L5;D4ACZ4;D3ZLZ8;D3ZC10		Epb4.1	26	33.2	91.979	2.23e-107
D4A9I9;F1LRY5;Q64380;D4A8Z7	Sarcosine dehydrogenase, mitochondrial	Sardh	5	5.7	101.66	5.69e-14
D4A9L2		Srsf1	10	37.1	27.744	1.88e-45
D4AA63		Ubqln2	4	8.2	67.259	0
D4AAV1		Amdhd1	12	31.3	46.57	5.99e-48
D4AB03		Fam120a	13	17.7	121.74	1.51e-236
D4AC23		Cct7	15	27.2	59.658	1.64e-83
D4ACB7;D3ZN76		LOC100360302	18	14.8	255.56	5.84e-233
D4ACB8		Cct8	13	28.1	59.588	1.63e-88
D4ACG2;D4A2Z4;D3Z9T1		Ilvbl	4	10	72.269	2.07e-46
D4ACJ1;P62850;D4A6H5;P62850-3;P62850-2;D3ZFZ8	40S ribosomal protein S24	LOC100363469;Rps24	6	36.1	15.395	2.39e-41
D4ACL3;G3V6S2;Q63270;Q62751	Cytoplasmic aconitate hydratase	Aco1	40	53.3	98.956	0
D4AD25;F1M779;P11442	Clathrin heavy chain 1	Cltc	54	35.9	192.02	0
D4ADE8;D3ZN21;Q64060;F1LQD1;D4ADV9		Ddx3x;RGD1309586	27	41.1	73.145	8.74e-195
D4ADJ6;REV__D3ZP58;REV__D3ZJB5;REV__D4A6F9;REV__D3ZMQ0		Amfr	11	23.5	72.271	4.98e-34
D4ADW8;G3V960;P10868	Guanidinoacetate N-methyltransferase	Gamt	5	25.6	28.188	2.96e-38
D4AEH3		Psmd7	8	37.8	36.491	1.4e-249
D4AEH9		Agl	29	20.8	174.33	2.49e-174
D4AEP0	Adenylosuccinate synthetase	Adss	4	12.3	50.085	3.08e-25
E2RUH2;P29315	Ribonuclease inhibitor	LOC100360501;Rnh1	5	12.5	49.919	1.32e-18
E9PSR5;D4A9N5		Trim25	10	19.8	71.089	1.55e-70
E9PT29			5	11.4	72.827	2.66e-56
E9PT65;D4A5L5			11	19.8	68.39	2.5e-112
E9PT85;Q6AZ64		Xrcc6	3	7.1	69.588	3.27e-11
E9PTL2;P12711;G3V7J9;P41682	Alcohol dehydrogenase class-3	Adh5	21	24.2	94.619	1.25e-248
E9PTL9		Ddx19b	2	9.1	54.216	2.35e-91
E9PTU4;E9PTI3;F1M7T3;D4A0G3;Q63862-3;Q63862;Q63862-2	Myosin-11	Myh11	88	38.4	223.8	0
E9PU16;F1M225;Q6NYB7;D3ZQP3;D3ZQP7;D3Z848;P35280;P70550;D4A8V5;P35289;P35286;P35281;D3ZGA3	Ras-related protein Rab-1A	Rab1;Rab1A	2	7	33.696	2.1e-13
E9PU28;D3ZLZ7	Inosine-5-monophosphate dehydrogenase 2	Impdh2	10	28.2	55.814	4.11e-86
E9PU64;D4A2G2		Scin	3	4.5	80.142	2e-15
F1LM22;P08542;P19488;F1M7N8;F1M3E3	UDP-glucuronosyltransferase 2B17;UDP-glucuronosyltransferase 2B37	Ugt2b17;Ugt2b37;LOC100361864	4	8.5	60.477	1.69e-35
F1LM41;Q62667	Major vault protein	Mvp	24	33.2	96.692	8.03e-122
F1LM47;F1M6A4		Sucla2	5	9.9	50.306	3.23e-16
F1LMD9;P97874;D3ZNM5	Cyclin-G-associated kinase	Gak	4	5.1	143.71	4.79e-30
F1LMG2;Q68FT5	Betaine--homocysteine S-methyltransferase 2	Bhmt2	8	27	39.799	1.06e-76
F1LMI4;P36506;D4A1X1	Dual specificity mitogen-activated protein kinase kinase 2	Map2k2	6	21.2	44.38	9.77e-244
F1LMJ9;Q6TXE9		Eprs	64	43.9	169.86	0
F1LMN4;P12938	Cytochrome P450 2D3	Cyp2d3	4	12.1	57.028	6.75e-147
F1LMV6		Dsp	52	18.7	332.39	9.51e-253
F1LMW6		Psmd14	5	24.8	32.924	6.46e-81
F1LMZ8;D3Z950		Psmd11	17	38.4	54.019	1.88e-145
F1LNF0;F1LMN2		Myh14	88	47.4	228.91	0
F1LNF1;F1LM82;A7VJC2;A7VJC2-2;A7VJC2-4;A7VJC2-3;D4A1X0	Heterogeneous nuclear ribonucleoproteins A2/B1	Hnrnpa2b1	4	13.6	37.297	3.38e-15
F1LNK4;F1LNZ2;Q2LC84;F1LRS4;Q2LC84-2;D3ZNB0	Protein numb homolog	Numb	4	7.5	70.913	4.5e-14
F1LNW3;P97562	Acyl-coenzyme A oxidase;Peroxisomal acyl-coenzyme A oxidase 2	Acox2	32	53.5	76.746	0
F1LP08;Q5PQJ6	Pyrroline-5-carboxylate reductase 3	Pycrl	6	24.1	28.864	3.47e-44
F1LP72;Q68FR9-2;Q68FR9;G3V9D9;G3V732;F8WG86	Elongation factor 1-delta	Eef1d	9	16.9	72.269	6.68e-109
F1LP75;F1M7H9		Luc7l2	14	27.1	40.774	1.75e-232
F1LPB3;D3ZW20;O88813	Long-chain-fatty-acid--CoA ligase 5	Acsl5	13	21.6	76.871	4.99e-138
F1LPF6;P11507;E9PSY3;D3ZJN5;E9PSX6;P11507-2;Q64578;P18596;D3ZBM5;D3ZHJ6;G3V9U7;P18596-2	Sarcoplasmic/endoplasmic reticulum calcium ATPase 2	Atp2a2	13	14.3	114.81	1.77e-168
F1LPK7;Q63598;D3ZRK9	Plastin-3	Pls3	11	22.5	70.998	4.43e-133
F1LPV0;F1LML0		Nars	7	20.6	64.198	2.45e-45
F1LPV8;F1M3K0		Suclg2	4	24	30.321	1.75e-85
F1LQ02;F1LMQ5;G3V9Y1;Q9JLT0	Myosin-10	Myh10	56	34.8	233.61	0
F1LQ09;D4A042		Atl2	4	8.7	66.194	7.95e-28
F1LQ81;Q9QUL6	Vesicle-fusing ATPase	Nsf	7	11.4	82.643	1.86e-53
F1LQ84;F1LQ23		Ugp2	12	26.6	56.838	6.22e-74
F1LQC0		Lars	10	11.6	134.41	2.79e-93
F1LQF5;Q3KR85		Ubac2	5	17.7	38.936	1.34e-11
F1LQK1;P05183;P04800;Q06884	Cytochrome P450 3A2;Cytochrome P450 3A1	Cyp3a2;Cyp3a1;Cyp3a73	5	11.3	57.795	4.3e-25
F1LQL3;P62718;F1M0K6	60S ribosomal protein L18a	Rpl18a;RGD1565566	11	39.8	22.319	4.45e-74
F1LQS3;P21533;D3ZTF3;F1M2R6;F1LVJ5;F1M2L7;F1M4J7	60S ribosomal protein L6	Rpl6	15	41.9	33.545	2.38e-218
F1LR41;G8JLS6;O08590	Amine oxidase;Membrane primary amine oxidase	G6pc;Aoc3	2	1.7	173	2.59e-08
F1LR47;P05178;D4A253;D4A820	Cytochrome P450 2C6	Cyp2c6v2;Cyp2c6	9	18.4	55.994	6.17e-52
F1LR89;O88656	Actin-related protein 2/3 complex subunit 1B	Arpc1b	8	21.5	41.477	2.35e-26
F1LRA1;Q62902	Protein ERGIC-53	Lman1	4	6.8	57.819	1.87e-08
F1LRA3;Q4V7C7;F1LRK8;F1LY09;D3ZHM0	Actin-related protein 3	Actr3	16	40.9	47.285	4.59e-113
F1LRD5;P41562	Isocitrate dehydrogenase [NADP];Isocitrate dehydrogenase [NADP] cytoplasmic	Idh1	28	61	47.462	3.61e-258
F1LRH5;A0FKI7-3;A0FKI7;A0FKI7-2	Acyl-CoA-binding domain-containing protein 5	Acbd5	4	9	57.554	9.18e-16
F1LRI5		Gcn1l1	22	11.9	293.17	3.09e-179
F1LRJ2		Srrm2	3	2	295.88	3.1e-12
F1LRL8		Arpc3	4	24.3	20.435	3.27e-13
F1LRR8;Q4V8K1;Q7TP88	Metalloreductase STEAP4	Steap4	5	15.5	52.674	1.17e-32
F1LS48;Q5XI22;D3ZKB6;F1LWW4	Acetyl-CoA acetyltransferase, cytosolic	Acat3;Acat2	9	20.8	69.82	4.58e-146
F1LS80;Q4V7C6;D4A7I4	GMP synthase [glutamine-hydrolyzing]	Gmps	9	16.2	77.762	9.71e-148
F1LS86		Iars	15	16.9	144.44	4.15e-180
F1LSI8;P47819;G8JLQ5;P47819-2	Glial fibrillary acidic protein	Gfap	5	14.4	50.07	2.32e-44
F1LSQ6;P48004;P48004-2;D3ZPN4;F1M6I7	Proteasome subunit alpha type;Proteasome subunit alpha type-7	Psma7;LOC100363246	4	24.4	28.398	1.21e-12
F1LSR9;P06757	Alcohol dehydrogenase 1	Adh1	23	53.2	39.994	0
F1LT36;P63326;D3ZH53;D3ZJY5;D3ZEN7;F8WFG4;D4A3Z5;D3ZCN9;D4A3Z6;Q7TP86	40S ribosomal protein S10	Rps10;RGD1561871;LOC100360905;LOC100363439	4	19	19.634	4.67e-20
F1LT49		Lrrc47	4	9.6	63.629	1.87e-30
F1LW74;D3ZCS4		LOC100360623	32	32.1	103.57	0
F1LX65;F1LXC8;F1LXC9			5	9.1	93.739	8.12e-192
F1LXC6			3	8.2	45.272	8.84e-92
F1LYK7		Cfl2	5	39.4	18.578	7.13e-170
F1LYQ5			10	23.8	61.437	7.41e-139
F1LZ34		Mat1a	3	10.8	23.534	0
F1LZW6;F1LX07		Slc25a13	19	33.3	74.382	1.66e-73
F1M127;F1M5T6;F1M124;F1LX32			7	7.8	130.51	2.09e-43
F1M1H0			4	18.2	34.054	1.57e-29
F1M1W1;O70490		Bucs1	8	44.6	29.745	3.05e-99
F1M3D3;F1LV13;Q62826;Q62826-2;F1LSJ5;Q9WV78	Heterogeneous nuclear ribonucleoprotein M	Hnrnpm	12	19.2	77.629	2.28e-37
F1M4S5;P83883;F1LWX1;F1M8T2;F8WFR5;D3ZDE0;D4A655	60S ribosomal protein L36a	RGD1563431;Rpl36a	8	30.2	12.278	2.56e-62
F1M510;P45592;F1M3P7	Cofilin-1	Cfl1	3	14.2	24.457	9e-188
F1M566;F1LTJ5			6	2	393.72	3.27e-27
F1M5L7			8	47.1	19.882	1.39e-104
F1M5X1;F1M853		Rrbp1	31	28.3	143.41	0
F1M5Z4;P25235;G8JLR0;D4A8V6	Dolichyl-diphosphooligosaccharide--protein glycosyltransferase subunit 2	Rpn2	7	17.7	71.783	2.48e-197
F1M784;F1LXQ8		LOC100361758	13	23.8	74.673	1.25e-124
F1M953;P48721	Stress-70 protein, mitochondrial	Hspa9	16	28.9	73.744	4.17e-95
F1MA29;P63159;D4A9T3;D3ZCR3;D3ZXR5;D3ZA18;D3ZGW6;D4A2L7;D3ZLA7;D3ZL49;D3ZIU9;D3Z8A3;D3ZC69;F1LXZ8;F1M1H9;F1LNG6;D3ZYR6;D3ZLG3;D3ZJN6;D4A0N6;D3Z7Z9;F1M9J4;D3ZZD8;D4AEI9;F1LVZ2;D4A4X8;D3ZWY0;D3ZFH8;F1LTK2;D3ZXP6;F1LTL3;D3ZRY5;D4A5S3;F1M7I0;F1M8Z1;D3ZMK0;F1LYW8;F1M2Z0;F1M607;P52925;D3ZS25;D3ZHA8;D3ZDA5;F1LZ92;D4A160;D3ZEC1;F1M1H1;D4A6A9;F1M875;F1M4R2	High mobility group protein B1	LOC681718;Hmgb1;LOC679451;Hmgb1-ps3;Hmg1l1	11	40	24.908	9.56e-106
F1MA36;Q9QWN8	Spectrin beta chain, brain 2	Sptbn2	60	33.8	270.94	0
F1MA38;P35565	Calnexin	Canx	5	10.5	67.414	5.2e-12
F1MA64;D4A5G0;D3ZR20		Rbm39	14	24.5	59.406	2.14e-107
F1MAC0;E9PU10		Ifi47	8	26.2	47.432	5.15e-66
F1MAE2		Akr1c13	5	30.5	37.257	0
F1MAK5		Ddi2	15	39.1	44.65	1.5e-95
F1MAL3;F1LSL8		Sptb	104	52.2	267.95	0
F1MAR0		Parp9	18	32.5	92.214	2.05e-298
F2Z3Q8;P52296	Importin subunit beta-1	Kpnb1	10	14.2	97.183	1.26e-85
F8WFI9;Q4G061	Eukaryotic translation initiation factor 3 subunit B	Eif3b	8	12.3	107.98	7.06e-143
F8WFR8;P51583	Multifunctional protein ADE2;Phosphoribosylaminoimidazole-succinocarboxamide synthase;Phosphoribosylaminoimidazole carboxylase	LOC100359876;Paics	4	12.9	47.122	8.09e-27
F8WFT7;P23562;Q5U329;P23562-2	Band 3 anion transport protein	Slc4a1	6	8.6	103.24	1.13e-38
F8WFW0;F1LWC2;P23358;D3ZJE2;F1M4N3;D4A8N3;F1LY34	60S ribosomal protein L12	Rpl12;Rpl12-ps1;LOC499782;RGD1563956	6	38.2	20.91	2.71e-116
F8WFW6;P62250	40S ribosomal protein S16	Rps16	15	55.2	19.156	3.4e-95
F8WG74;Q9QVC8	Peptidyl-prolyl cis-trans isomerase FKBP4;Peptidyl-prolyl cis-trans isomerase FKBP4, N-terminally processed	Fkbp4	4	9.2	51.506	3.42e-10
G3V624		Coro1c	4	10.1	53.177	4.62e-37
G3V6B0;F1M024;F1M5Z2;F1LTX6		Pdxdc1	11	18.7	86.97	1.39e-124
G3V6C2		Hgd	12	42.2	49.889	4.3e-152
G3V6C4;O70199	UDP-glucose 6-dehydrogenase	Ugdh	24	54.2	54.886	0
G3V6D3;P10719	ATP synthase subunit beta;ATP synthase subunit beta, mitochondrial	Atp5b	22	58	56.344	0
G3V6I4		rCG_20363	4	15.6	37.79	1.82e-81
G3V6I9;D4A1Z2;P12749;D4AE42;D3ZSF2;D3ZDV4	60S ribosomal protein L26	Rpl26;Rpl26-ps2;Rpl26-ps1	16	57.9	17.258	3.25e-108
G3V6J0;Q9JLJ3	4-trimethylaminobutyraldehyde dehydrogenase	Aldh9a1	25	43.4	56.468	0
G3V6P7;D4A1H1;D4A8U6		Myh9	22	7.8	226.41	0
G3V6P9;E9PSP2		Sptbn1	3	1.9	251.02	0
G3V6S0;F1LRX5		Sptbn1	3	2.1	274.06	0
G3V6S5;P27653;F1LW12;D3ZZM8	C-1-tetrahydrofolate synthase, cytoplasmic;Methylenetetrahydrofolate dehydrogenase;Methenyltetrahydrofolate cyclohydrolase;Formyltetrahydrofolate synthetase	Mthfd1	55	59.5	100.96	0
G3V6S8		LOC362264	6	17.1	39.025	1.55e-29
G3V6T1;D3ZFS9		Copa	37	34.5	138.36	0
G3V6T7;P38659	Protein disulfide-isomerase A4	Pdia4	8	15.6	72.747	4.26e-32
G3V6W6		LOC100365869	22	64.5	45.796	6.41e-225
G3V6X4;F1LQ82;Q62940;D4A0U5	E3 ubiquitin-protein ligase NEDD4	Nedd4	11	16.9	102.75	1.29e-109
G3V709;Q6XQN1	Nicotinate phosphoribosyltransferase	Naprt1	8	17.5	58.603	2.9e-49
G3V713;Q4KM49	Tyrosine--tRNA ligase, cytoplasmic	Yars	8	20	63.025	2.61e-98
G3V734;Q64591	2,4-dienoyl-CoA reductase, mitochondrial	Decr1	4	17.9	36.132	2.58e-13
G3V743;O88941	Mannosyl-oligosaccharide glucosidase	Mogs	6	8.9	91.961	3.93e-48
G3V798;F1LSN0		Srsf4	4	12.1	55.674	9.63e-21
G3V7C6;Q6P9T8	Tubulin beta-4B chain	Tubb4b	7	17.3	49.83	0
G3V7G8;Q5I0G4	Glycine--tRNA ligase	Gars	6	11.5	81.792	2.93e-71
G3V7G9		Eif3s6ip	15	33.2	66.71	1.99e-169
G3V7J0;Q02253	Methylmalonate-semialdehyde dehydrogenase [acylating], mitochondrial	Aldh6a1	23	47.5	57.747	2.08e-302
G3V7L6;Q63347	26S protease regulatory subunit 7	Psmc2	22	59.1	48.633	2.4e-205
G3V7N8;P97840;P97840-2;Q6P7Q6;D3Z839	Galectin-9	Lgals9	4	11.6	39.969	1.58e-73
G3V7Q7;D3ZWX0		Iqgap1	50	34.2	188.83	0
G3V7T5;Q3MIF4	Xylulose kinase	Xylb	12	26.5	59.579	4.77e-158
G3V7W2;P04937;P04937-3;D4AEE1;P04937-2;F1LST1;P04937-4	Fibronectin;Anastellin	Fn1	19	10.7	272.44	1.1e-163
G3V817		Xrcc5	4	6.7	83.091	1.45e-14
G3V826;P50137	Transketolase	Tkt	20	35.1	71.158	5.75e-92
G3V836;P05371;F1LSV6;E9PTR1	Clusterin;Clusterin;Clusterin beta chain;Clusterin alpha chain	Clu	5	15.9	51.42	4.59e-41
G3V852;D4A0S8;F1M4K5		Tln1	78	37.2	269.67	0
G3V888;F1LQS4;P16638;G3V9G4;P16638-2	ATP-citrate synthase	Acly	49	49	120.78	0
G3V8A5		Vps35	13	20.4	91.726	2.92e-293
G3V8C4;Q9Z0W7	Chloride intracellular channel protein 4	Clic4	3	18.2	28.669	1.78e-19
G3V8D5;P85971	6-phosphogluconolactonase	Pgls	9	38.5	30.821	7.69e-60
G3V8G2;D4A8S4		Psmd5	10	24.6	55.852	8.04e-81
G3V8I6;F1LR10;Q4KM31		Lima1	24	39.5	83.796	5.35e-202
G3V8L3;P48679;E9PSR1;D4A4U0;G3V8M3	Prelamin-A/C;Lamin-A/C	Lmna	10	17.7	74.311	1.16e-41
G3V900;F1LP06;P05065	Fructose-bisphosphate aldolase;Fructose-bisphosphate aldolase A	Aldoa;Aldoal1	4	10.8	45.086	1.95e-14
G3V928		Lrp1	27	7.9	504.88	1.36e-141
G3V940;O89046	Coronin-1B	Coro1b	6	14.9	53.938	1.16e-105
G3V9A2;B2GV99;D3ZCQ5;Q64119;D4A2L0	Myosin light polypeptide 6	Myl6b;Myl6	12	87.4	16.961	0
G3V9B9;P21775;F1LPD6;P07871;D4AB84;P21775-2;D4AE53;D3ZHR3	3-ketoacyl-CoA thiolase A, peroxisomal;3-ketoacyl-CoA thiolase B, peroxisomal	Acaa1a;Acaa1b	18	43.1	44.825	0
G3V9E3;Q62736;F1LQD6;REV__D3ZXH0;REV__D3ZRB1;REV__D3ZZ81;REV__F1M8A4	Non-muscle caldesmon	Cald1	18	30.7	60.611	3.78e-103
G3V9G2;Q9JJ54;G3V6A4;Q9JJ54-3;G3V6A5;Q9JJ54-2;Q9JJ54-4;P17132	Heterogeneous nuclear ribonucleoprotein D0;Heterogeneous nuclear ribonucleoprotein C	Hnrpd;Hnrnpd;Hnrnpc	5	14.4	38.218	1.27e-19
G3V9J1;P14046;F1M4L8;P06238	Alpha-1-inhibitor 3	LOC297568;A1i3;Cpamd8	3	2.7	163.72	1.86e-29
G3V9L3		Dusp3	3	20.9	23.115	5.47e-47
G3V9N8;P52303;D3ZT02;P52303-2;D3ZS80	AP-1 complex subunit beta-1	Ap1b1	5	6.3	104.54	1.02e-33
G3V9R0;F1LNK3;F1LNB8;D3ZFH3		Luc7l	12	41.5	38.481	1e-135
G3V9R4;O35826	Bifunctional UDP-N-acetylglucosamine 2-epimerase/N-acetylmannosamine kinase;UDP-N-acetylglucosamine 2-epimerase;N-acetylmannosamine kinase	Gne	24	35.5	82.911	0
G3V9U2;F1LWF9;P13437	3-ketoacyl-CoA thiolase, mitochondrial	Acaa2	29	73.8	41.885	0
G3V9V3;Q62871;Q62871-2;Q6AZ35;D3ZU74;Q62871-3;G3V792;Q63100;Q63100-3;D4A9K8;Q63100-4	Cytoplasmic dynein 1 intermediate chain 2	Dync1i2	5	12.1	71.338	4.06e-68
G3V9Y7;Q5BK32	FAS-associated factor 2	Faf2	9	28.1	52.46	8.91e-39
G3V9Z4;Q5I0J9	Putative L-aspartate dehydrogenase	Aspdh	11	50.9	30.388	2.51e-121
O08557;F1LNX0	N(G),N(G)-dimethylarginine dimethylaminohydrolase 1	Ddah1	5	27	31.426	4.38e-19
O08629;F1M1W6	Transcription intermediary factor 1-beta	Trim28	11	17	88.955	1.3e-158
O09171	Betaine--homocysteine S-methyltransferase 1	Bhmt	25	64.4	44.976	0
O35077;F1M3R0	Glycerol-3-phosphate dehydrogenase [NAD(+)], cytoplasmic	Gpd1	17	46.7	37.452	0
O35142	Coatomer subunit beta	Copb2	24	34.5	102.55	0
O35244;F8WG72	Peroxiredoxin-6	Prdx6	10	61.2	24.818	4.05e-137
O35509;P62494;F1M0S1	Ras-related protein Rab-11B;Ras-related protein Rab-11A	Rab11b;Rab11a	6	28	24.488	7.17e-18
O35763;F1LP60;P31977;F1M390	Moesin;Ezrin	Msn;Ezr	3	4.5	67.738	1.06e-08
O35824;Q5M9H7	DnaJ homolog subfamily A member 2	Dnaja2	5	11.7	45.765	5.05e-19
O35952;F1LQI1;O35952-2	Hydroxyacylglutathione hydrolase, mitochondrial	Hagh	3	17.2	34.109	1.53e-32
O70351;F1LNT4	3-hydroxyacyl-CoA dehydrogenase type-2	Hsd17b10	11	48.3	27.245	3.21e-153
O88202	60 kDa lysophospholipase;L-asparaginase;Platelet-activating factor acetylhydrolase	Aspg	9	25.9	60.794	1.28e-115
O88321;D4A9C9		Psmd4	9	30.5	41.073	3.57e-119
O88618	Formimidoyltransferase-cyclodeaminase;Glutamate formimidoyltransferase;Formimidoyltetrahydrofolate cyclodeaminase	Ftcd	20	39.9	58.913	5.89e-231
O88767;Q5BKC3	Protein DJ-1	Park7	7	37.6	19.974	8.06e-19
O88989	Malate dehydrogenase, cytoplasmic	Mdh1	9	32.6	36.483	3.13e-53
P00173;D4A1G4;P00173-2	Cytochrome b5	Cyb5a	10	56.7	15.355	3.07e-135
P00481;F1MAE6	Ornithine carbamoyltransferase, mitochondrial	Otc	9	27.1	39.886	1.63e-19
P00502;Q6TUG1;D3ZD94	Glutathione S-transferase alpha-1	Gsta1	2	7.7	25.607	6.12e-68
P00786	Pro-cathepsin H;Cathepsin H mini chain;Cathepsin H;Cathepsin H heavy chain;Cathepsin H light chain	Ctsh	4	11.7	37.104	1.47e-15
P00884;Q66HT1	Fructose-bisphosphate aldolase B;Fructose-bisphosphate aldolase	Aldob	25	54.9	39.618	2.23e-260
P01026	Complement C3;Complement C3 beta chain;Complement C3 alpha chain;Neutrophil chemotactic factor-2;C3a anaphylatoxin;Complement C3b alpha chain;Complement C3c alpha chain fragment 1;Complement C3dg fragment;Complement C3g fragment;Complement C3d fragment;Complement C3f fragment;Complement C3c alpha chain fragment 2	C3	23	17.7	186.46	2.66e-255
P01946;G3V8R3	Hemoglobin subunit alpha-1/2	Hba1	9	66.9	15.328	3.42e-277
P02091;CON__Q3SX09;O88752;CON__P02070	Hemoglobin subunit beta-1	Hbb	6	33.3	15.979	0
P02262;P0CC09;D4ACV3	Histone H2A type 1;Histone H2A type 2-A;Histone H2A	Hist2h2aa3;Hist2h2ac	2	13.8	14.077	1.57e-108
P02600;P02600-2;P17209	Myosin light chain 1/3, skeletal muscle isoform	Myl1	2	11.6	20.679	2.32e-150
P02650	Apolipoprotein E	Apoe	8	30.4	35.753	8.47e-30
P02680;P02680-2	Fibrinogen gamma chain	Fgg	6	19.8	50.632	2.29e-98
P02692	Fatty acid-binding protein, liver	Fabp1	11	66.1	14.272	6.57e-155
P02706;D3ZMH8	Asialoglycoprotein receptor 1	Asgr1	11	35.6	32.849	6.48e-56
P02770	Serum albumin	Alb	18	31.1	68.73	5.12e-72
P04041	Glutathione peroxidase 1	Gpx1	15	62.7	22.323	1.06e-181
P04642;F1M7I5;F1M2L5;D4AD97;P19629;Q6AYX2;D3ZM24;F1M1K4	L-lactate dehydrogenase A chain;L-lactate dehydrogenase	Ldha	22	63	36.45	0
P04762;D3ZYF1;Q499V8	Catalase	Cat	33	64.9	59.756	0
P04764;D3ZJT8;F1M8W1;F1M6P0;D3ZKP2;P15429;F1LTP6;D3ZYU0;F1M2K7;F1M383;P07323;D4A0Q2;F1M9V3;G8JLQ8;F1M5J0	Alpha-enolase	Eno1	18	50.7	47.127	2.49e-162
P04785	Protein disulfide-isomerase	P4hb	28	51.5	56.951	2.64e-129
P04797;D3ZGY4;E9PTN6;F8WFP3;F1M2U5;D3ZKR3;F1M0Y3;F1M9J7;F1LW99;F1LTU2;F1LUR7;D3ZWV2;F1M359;D3ZDS1;F1LZV7;F1LU03;D3ZQC7;D3ZWP0;F1LY57;D4A3W5;D3ZIY0;F1LUI2;F1LUV3;D4A7F9;F1LZ22;D3Z8U8;F1M9J9;F1M9K7;B1WBQ8;Q9ESV6;D3ZQT0;D4A6J7;D3ZEN2;F1M5I8;F1M4G6;F1M2N4;F1M261;F1M0P5;F1LW42;F1LTV2;F1LW78;D3ZPI7;D4AB12;D3ZXS2;D3ZME3;D3ZW22;D3Z8G2;F1M269;F1MA05;F1LT88;F1M045;E9PTV9;F1M5K4;D3Z7Z7;F1LVS0;D3ZHE9;F1M3A3;…	Glyceraldehyde-3-phosphate dehydrogenase	Gapdh;RGD1560797;RGD1564688	13	43.5	35.828	0
P04897;Q5EEY3;Q63803;D3ZPZ2;P63095;G3V8E8;P38406;D4AA42;P08753;P10824;P29348;P59215;P59215-2;P63095-3	Guanine nucleotide-binding protein G(i) subunit alpha-2	Gnai2	2	9.6	40.499	2.52e-19
P04904;P46418;Q6AXY0	Glutathione S-transferase alpha-3	Gsta3	10	39.8	25.319	6.3e-74
P05179;D3Z7Y1	Cytochrome P450 2C7	Cyp2c7;LOC100361347	21	38.2	56.186	0
P05182;F1LPJ4;D3ZJL9	Cytochrome P450 2E1	Cyp2e1	9	19.5	56.626	2.81e-30
P05197;F1LM66	Elongation factor 2	Eef2	55	53.1	95.283	0
P05369;F1LND7;D3ZJW2	Farnesyl pyrophosphate synthase	Fdps	11	29.2	40.829	1.1e-120
P06536;G3V7U9;E9PT44;P06536-2	Glucocorticoid receptor	Nr3c1	3	5.9	87.555	5.13e-11
P06685;F1M9H2;D3ZE88;D3ZSA3;P06686;P06687;F1LRK1;G3V8S4;P54708;F1LMF3;Q64541;P54708-2;F1LUN7	Sodium/potassium-transporting ATPase subunit alpha-1	Atp1a1	5	6.1	113.05	2.45e-18
P06761	78 kDa glucose-regulated protein	Hspa5	42	60.4	72.346	0
P06866-2;P06866	Haptoglobin;Haptoglobin alpha chain;Haptoglobin beta chain	Hp	4	12.1	42.474	1.44e-08
P07153	Dolichyl-diphosphooligosaccharide--protein glycosyltransferase subunit 1	Rpn1	20	42.5	68.303	1.65e-207
P07379;F1LQJ7	Phosphoenolpyruvate carboxykinase, cytosolic [GTP]	Pck1	27	51.8	69.415	3.94e-284
P07687;F1LTS8;F8WG46	Epoxide hydrolase 1	Ephx1	7	19.1	52.581	2.6e-27
P07756;F1M9N2	Carbamoyl-phosphate synthase [ammonia], mitochondrial	Cps1	22	14.9	164.58	0
P07824	Arginase-1	Arg1	18	67.2	34.973	3.35e-155
P07872-2;P07872;F1M609;F1LQC1	Peroxisomal acyl-coenzyme A oxidase 1;Peroxisomal acyl-CoA oxidase 1, A chain;Peroxisomal acyl-CoA oxidase 1, B chain;Peroxisomal acyl-CoA oxidase 1, C chain;Acyl-coenzyme A oxidase	Acox1	24	45.2	74.69	0
P07896	Peroxisomal bifunctional enzyme;Enoyl-CoA hydratase/3,2-trans-enoyl-CoA isomerase;3-hydroxyacyl-CoA dehydrogenase	Ehhadh	49	60.5	78.657	0
P07953;P07953-2;F1LQX5;P25114;F1M7B7	6-phosphofructo-2-kinase/fructose-2,6-bisphosphatase 1;6-phosphofructo-2-kinase;Fructose-2,6-bisphosphatase	Pfkfb1	14	32.9	54.763	6.75e-132
P08010;D4AB97;F1LXL7;D4AB87	Glutathione S-transferase Mu 2	Gstm2	13	48.6	25.702	1.4e-178
P08011	Microsomal glutathione S-transferase 1	Mgst1	6	36.8	17.471	5.57e-32
P08033	Gap junction beta-1 protein	Gjb1	4	13.4	32.003	4.83e-21
P08081;D3ZPJ7;P08081-2	Clathrin light chain A	Clta	8	29	26.98	4.79e-69
P08503;G3V796	Medium-chain specific acyl-CoA dehydrogenase, mitochondrial	Acadm	14	41.1	46.555	1.34e-135
P08541;D3ZLR6;F1LLV5;Q62789;G3V688	UDP-glucuronosyltransferase 2B2	Ugt2b	4	7	60.985	1.28e-30
P08649;F1LNM4	Complement C4;Complement C4 beta chain;Complement C4 alpha chain;C4a anaphylatoxin;Complement C4 gamma chain	C4;C4-2	5	4.7	192.16	7.1e-188
P08683;P11510;E9PTW8;F1LSA2;P04167-2;B2GV28;P00176;P04167	Cytochrome P450 2C11	Cyp2c11	14	31.6	57.18	4.97e-85
P09006	Serine protease inhibitor A3N	Serpina3n	10	24.9	46.651	3.54e-163
P09034	Argininosuccinate synthase	Ass1	48	77.9	46.496	0
P09118;F1LZ17	Uricase	Uox	3	14.5	34.934	7.61e-27
P09139;P09139-2	Serine--pyruvate aminotransferase, mitochondrial	Agxt	13	31.9	45.834	9.37e-74
P09367;F1LMK6;P09367-2	L-serine dehydratase/L-threonine deaminase	Sds	8	26.7	38.432	2.21e-63
P09495	Tropomyosin alpha-4 chain	Tpm4	26	63.7	28.509	0
P09527	Ras-related protein Rab-7a	Rab7a	3	16.9	23.504	1.92e-18
P09606	Glutamine synthetase	Glul	14	35.9	42.267	8.27e-282
P09811;G3V8V3;B2GV03;G3V6Y6;P53534;P09812	Glycogen phosphorylase, liver form	Pygl	61	54.5	97.482	0
P0C2X9;F1LQ99;F8WFI0	Delta-1-pyrroline-5-carboxylate dehydrogenase, mitochondrial	Aldh4a1	12	21.8	61.868	1.02e-58
P10111;F1LU07;F1M4T9	Peptidyl-prolyl cis-trans isomerase A;Peptidyl-prolyl cis-trans isomerase	Ppia	6	36	17.874	5.51e-54
P10634	Cytochrome P450 2D26	Cyp2d26	11	28.4	56.683	3.2e-206
P10760;D4AB27;D3ZQH8	Adenosylhomocysteinase	Ahcy	24	44.4	47.538	1.24e-233
P10860	Glutamate dehydrogenase 1, mitochondrial	Glud1	28	42.3	61.415	0
P11030;F1LV02	Acyl-CoA-binding protein;Triakontatetraneuropeptide;Octadecaneuropeptide	Dbi	2	36.8	10.027	4.79e-07
P11232	Thioredoxin	Txn	4	25.7	11.673	1.59e-13
P11348	Dihydropteridine reductase	Qdpr	9	45.2	25.552	6.59e-56
P11497;P11497-2;F1LP35;D3ZRA3	Acetyl-CoA carboxylase 1;Biotin carboxylase	Acaca	35	21.8	265.19	0
P11517	Hemoglobin subunit beta-2		4	32	15.982	0
P11598	Protein disulfide-isomerase A3	Pdia3	25	51.1	56.623	1.37e-155
P11711	Cytochrome P450 2A1	Cyp2a1	2	4.3	55.994	8.77e-42
P11915;F1LQ55;P11915-2;Q6QI48	Non-specific lipid-transfer protein	Scp2	25	44.8	58.813	8.21e-285
P11951;F1M733;P11950	Cytochrome c oxidase subunit 6C-2	Cox6c2	4	46.1	8.4548	1.95e-13
P12001;D4AD69;D3ZWH7	60S ribosomal protein L18	Rpl18	13	50.5	21.658	4.31e-110
P12785	Fatty acid synthase;[Acyl-carrier-protein] S-acetyltransferase;[Acyl-carrier-protein] S-malonyltransferase;3-oxoacyl-[acyl-carrier-protein] synthase;3-oxoacyl-[acyl-carrier-protein] reductase;3-hydroxypalmitoyl-[acyl-carrier-protein] dehydratase;Enoyl-[acyl-carrier-protein] reductase;Oleoyl-[acyl-carrier-protein] hydrolase	Fasn	88	42	272.65	0
P12928-2;P12928;D3ZH85;F1LTA5	Pyruvate kinase isozymes R/L	Pklr	31	68.9	58.793	0
P12939;Q5I0P9	Cytochrome P450 2D10	Cyp2d10;Cyp2d5	2	5.8	57.076	5.12e-227
P13086	Succinyl-CoA ligase [ADP/GDP-forming] subunit alpha, mitochondrial	Suclg1	11	26	36.148	1.7e-106
P13107;F1LME8;G3V9D2	Cytochrome P450 2B3	Cyp2b3	4	7.7	56.384	2.39e-11
P13255	Glycine N-methyltransferase	Gnmt	8	33.1	32.549	1.23e-94
P13444	S-adenosylmethionine synthase isoform type-1	Mat1a	11	18.9	43.697	0
P13471;Q6PDV6;D4A290;F1MA00	40S ribosomal protein S14	Rps14	9	41.7	16.259	3.02e-177
P13803;REV__Q9Z2Y1;REV__E9PTS7;REV__E9PU68;REV__F1MAI7	Electron transfer flavoprotein subunit alpha, mitochondrial	Etfa	10	32.7	34.951	1.34e-36
P13832	Myosin regulatory light chain RLC-A	Rlc-a	2	16.3	19.895	0
P14056;F1M9C3	Serine/threonine-protein kinase A-Raf	Araf	6	19.4	67.551	7.7e-38
P14141	Carbonic anhydrase 3	Ca3	15	74.2	29.431	0
P14408;Q5M964;P14408-2	Fumarate hydratase, mitochondrial	Fh	18	52.7	54.463	0
P14480-2;D3Z8Y5;P14480;CON__P02676	Fibrinogen beta chain;Fibrinopeptide B;Fibrinogen beta chain	Fgb	5	10.3	56.612	2.92e-40
P14604	Enoyl-CoA hydratase, mitochondrial	Echs1	4	19.3	31.516	6.19e-17
P14669;F1LSV5;F1M3H7;F1M0L7;Q6TXF2	Annexin A3;Annexin	Anxa3	4	13.9	36.363	4.32e-08
P15178	Aspartate--tRNA ligase, cytoplasmic	Dars	19	46.7	57.126	1.69e-141
P15650	Long-chain specific acyl-CoA dehydrogenase, mitochondrial	Acadl	9	23.3	47.872	7.44e-38
P15709;D3ZR55	Bile salt sulfotransferase	St2a1	2	9.2	33.19	1.57e-193
P15999;F1LP05	ATP synthase subunit alpha, mitochondrial;ATP synthase subunit alpha	Atp5a1	42	60.4	59.753	0
P16617;Q5XIV1;D4A9Z5	Phosphoglycerate kinase 1	Pgk1	26	61.2	44.538	0
P16970;F1LR38	ATP-binding cassette sub-family D member 3	Abcd3	38	47.5	75.315	0
P17074;D4A6G6;D3ZSH6;F1LYF3;F1M764;F1M8C7;D3ZUD7;D3ZGN8;F1M395;F1M9M2;D4A8B9;F1LYT7;F1LUH5	40S ribosomal protein S19	Rps19;LOC100362339;LOC100360843;RGD1562153;LOC687298	18	75.2	16.085	5.44e-93
P17077;D3ZMB8;F1M7A9;F1LX84;D4ABC9;F1M2X8;D3ZZQ7;F1M309	60S ribosomal protein L9	Rpl9;RGD1561789;RGD1561928	10	48.4	21.893	8.43e-91
P17078;D3ZN79;D3ZB50;F1M6G3;D3Z942;D3ZEF3	60S ribosomal protein L35	Rpl35;LOC686074	7	42.3	14.552	1.63e-116
P17625;D3ZDS5;D4A5K9	Glycogen [starch] synthase, liver	Gys2	6	10.2	80.733	9.72e-86
P17712;P17712-3;P17712-2;Q64596	Glucokinase	Gck	8	21.7	52.116	1.36e-131
P17764	Acetyl-CoA acetyltransferase, mitochondrial	Acat1	9	27.6	44.695	1.46e-88
P17988	Sulfotransferase 1A1	Sult1a1	14	52.6	33.906	4.41e-201
P18163	Long-chain-fatty-acid--CoA ligase 1	Acsl1	26	36.1	78.178	0
P18297;D3ZT59	Sepiapterin reductase	Spr	4	18.7	28.128	1.65e-13
P18418	Calreticulin	Calr	11	26	47.995	5.84e-85
P18420	Proteasome subunit alpha type-1	Psma1	3	16.3	29.517	5.88e-17
P18589;Q499Q3;D3ZUF7;P18590;D4A5U9	Interferon-induced GTP-binding protein Mx2;Interferon-induced GTP-binding protein Mx3	Mx2;Mx3	3	5.6	75.073	8.69e-86
P19112;F1LRT1;Q9Z1N1	Fructose-1,6-bisphosphatase 1	Fbp1	26	68.6	39.609	0
P19225	Cytochrome P450 2C70	Cyp2c70	4	10	56.156	7.43e-34
P19468	Glutamate--cysteine ligase catalytic subunit	Gclc	11	30	72.618	1.18e-197
P19511	ATP synthase subunit b, mitochondrial	Atp5f1	3	12.9	28.868	1.93e-85
P19804;Q05982;D3ZGV9	Nucleoside diphosphate kinase B;Nucleoside diphosphate kinase A	Nme2;Nme1	5	50.7	17.283	2.69e-35
P19945;D3ZJT4;F1M2B8;D3ZAV9	60S acidic ribosomal protein P0	Rplp0	14	47.3	34.215	7.01e-201
P20070-2;P20070;P20070-3	NADH-cytochrome b5 reductase 3;NADH-cytochrome b5 reductase 3 membrane-bound form;NADH-cytochrome b5 reductase 3 soluble form	Cyb5r3	6	27	34.865	1.62e-38
P20673;Q4QRB8	Argininosuccinate lyase	Asl	24	47.7	51.549	2.05e-284
P20814;D3Z8S1	Cytochrome P450 2C13, male-specific	Cyp2c13;LOC100361492	3	8.2	55.859	4.76e-17
P20816	Cytochrome P450 4A2	Cyp4a2	4	11.3	57.968	1.78e-52
P21531;D3ZXU8;D4A9G1	60S ribosomal protein L3	Rpl3	27	53.8	46.135	4.81e-215
P21643	Tryptophan 2,3-dioxygenase	Tdo2	7	20.4	47.856	2.87e-45
P22734;P22734-2	Catechol O-methyltransferase	Comt	13	34.1	29.597	1.77e-106
P22791;F1M9Q5;P17425	Hydroxymethylglutaryl-CoA synthase, mitochondrial	Hmgcs2	21	38.6	56.911	0
P23457;P51652;G3V895;Q6AYQ2;D3ZEL2;F1LU12;F1M6N4;D3ZRB7	3-alpha-hydroxysteroid dehydrogenase	Akr1c9	24	61.8	37.027	0
P23514	Coatomer subunit beta	Copb1	18	25.8	107.01	0
P24008;G8JLS2;P24008-2;F1M6Y1	3-oxo-5-alpha-steroid 4-dehydrogenase 1	Srd5a1	3	9.7	29.78	7.92e-07
P24329	Thiosulfate sulfurtransferase	Tst	6	22.6	33.406	1.62e-35
P24470;Q68G40	Cytochrome P450 2C23	Cyp2c23	11	22.9	56.432	6.45e-45
P24473	Glutathione S-transferase kappa 1	Gstk1	4	28.8	25.493	9.41e-48
P25093;F1M6W1;D4AEK8	Fumarylacetoacetase	Fah	10	33.9	45.975	8.32e-111
P25113;P16290;F1M1Y1	Phosphoglycerate mutase 1;Phosphoglycerate mutase 2	Pgam1;Pgam2	9	40.6	28.832	7.91e-24
P25409	Alanine aminotransferase 1	Gpt	4	7.5	55.109	6.73e-11
P25886;F1LYI5;D4A3G6;D3ZWV1;D4A883;D3Z8Q4;D3ZKM8;D4A7X3;F1LX53;D3ZIV1;D4AEL5;F1LW15;D3ZDV6;F1LVH1;F1M2K5;F1M3I7;F1M346;D3Z7Z0;F1LWX2;F1M4V2;F1LZU8;F1M4N2;D4A888;D4A1N7	60S ribosomal protein L29	Rpl29;RGD1564138	7	32.7	17.325	5.29e-17
P27364;F1LNS3;P22072;P22071;Q62878	3 beta-hydroxysteroid dehydrogenase type 5;3 beta-hydroxysteroid dehydrogenase/Delta 5-->4-isomerase type 2;3-beta-hydroxy-Delta(5)-steroid dehydrogenase;Steroid Delta-isomerase	Hsd3b5;Hsd3b	3	9.4	42.206	7.7e-63
P27867;Q6TUH3	Sorbitol dehydrogenase	Sord	16	35	38.234	7.65e-108
P27952;G3V957;E9PU05;E9PTY3;D3ZQW7;D3ZIY7;F1LUI9;F1LZV8;D4A577;E9PT76;E9PSQ6;D3ZT78;D3ZQ72;D3ZHD8;F1M5X9;D3ZW37;D3ZAS1;F1LVB4;D3ZP90;F1LUE4;F1M474;E9PTW0	40S ribosomal protein S2	Rps2;LOC100359960;LOC688473;RGD1560789	10	32.8	31.231	3.71e-38
P28037	Cytosolic 10-formyltetrahydrofolate dehydrogenase	Aldh1l1	44	50.9	98.873	0
P28480;F1LUR8	T-complex protein 1 subunit alpha	Tcp1	18	39.7	60.359	1.21e-106
P29147	D-beta-hydroxybutyrate dehydrogenase, mitochondrial	Bdh1	8	22.4	38.201	1.8e-26
P29314;D3ZV50;D3ZF87;F1LY44;D3ZGL8;D3ZTT5	40S ribosomal protein S9	Rps9;RGD1566136;LOC100364509	19	58.8	22.591	2.83e-73
P29410;P29410-2	Adenylate kinase 2, mitochondrial	Ak2	3	15.5	26.379	1.79e-05
P29457;Q5RJR9	Serpin H1	Serpinh1	6	22.8	46.517	2.8e-38
P30713	Glutathione S-transferase theta-2	Gstt2	10	43	27.439	3.23e-58
P31000;G3V8C3;F1M7P4;P21807;P12839;G3V7S2;G3V8Q2;P23565;P19527	Vimentin	Vim	50	80.5	53.732	0
P31044	Phosphatidylethanolamine-binding protein 1;Hippocampal cholinergic neurostimulating peptide	Pebp1	7	57.8	20.801	8.73e-75
P31210;F1LML3	3-oxo-5-beta-steroid 4-dehydrogenase	Akr1d1	25	81	37.377	0
P32089;F1M1U5	Tricarboxylate transport protein, mitochondrial	Slc25a1	9	26	33.835	1.37e-23
P32232;F1LME2;P32232-2;D3ZPH9;P32232-3;D3ZSC5	Cystathionine beta-synthase	Cbs	4	8.7	61.454	1.29e-14
P32551	Cytochrome b-c1 complex subunit 2, mitochondrial	Uqcrc2	5	13.1	48.396	4.06e-13
P32755;F1LNW9	4-hydroxyphenylpyruvate dioxygenase	Hpd	18	53.7	45.112	7.84e-99
P34058;D4A2Z9;D4AE04;F1LT18;F1LYW7;F1M2F7;F1M4X8;D3ZNW2;D3ZZB5;D3ZXC7	Heat shock protein HSP 90-beta	Hsp90ab1	33	40.3	83.28	0
P35213;P35213-2	14-3-3 protein beta/alpha;14-3-3 protein beta/alpha, N-terminally processed	Ywhab	4	22.4	28.054	2.17e-142
P35427;Q5RK10	60S ribosomal protein L13a	Rpl13a	15	56.2	23.476	2.86e-50
P35704;D4AAA7	Peroxiredoxin-2	Prdx2	7	31.3	21.783	5.13e-31
P36201;D4ACX1	Cysteine-rich protein 2	Crip2	8	62	22.696	2.03e-33
P38650;D3ZGC7	Cytoplasmic dynein 1 heavy chain 1	Dync1h1	24	5	532.25	0
P38918	Aflatoxin B1 aldehyde reductase member 3	Akr7a3	8	26.9	36.747	2.5e-30
P38983	40S ribosomal protein SA	Rpsa	8	47.1	32.824	2.19e-98
P40329	Arginine--tRNA ligase, cytoplasmic	Rars	9	18.2	75.81	6.75e-91
P41034	Alpha-tocopherol transfer protein	Ttpa	8	30.9	31.845	2.21e-112
P41123;D4A075;D3ZRM9;D3ZD02;D3Z9H4;F1M2E9;F1LUH3;D3ZFF0	60S ribosomal protein L13	Rpl13;LOC100361259;LOC100360491;RGD1563145	14	44.5	24.309	7.49e-211
P41498;P41498-2	Low molecular weight phosphotyrosine protein phosphatase	Acp1	9	47.5	18.151	1.1e-168
P41542;D4AAH7;D4AAI0;REV__P59215;REV__P59215-2	General vesicular transport factor p115	Uso1	24	31.6	107.16	0
P46462	Transitional endoplasmic reticulum ATPase	Vcp	34	44.3	89.348	7.54e-264
P46953	3-hydroxyanthranilate 3,4-dioxygenase	Haao	11	44.1	32.582	1.55e-54
P47942	Dihydropyrimidinase-related protein 2	Dpysl2	8	21.9	62.277	1.66e-163
P47967;G3V7N2	Galectin-5	Lgals5	2	15.2	16.196	5.19e-39
P48037;Q6IMZ3;D4ABR6	Annexin A6;Annexin	Anxa6	9	15.8	75.753	9.58e-24
P48500	Triosephosphate isomerase	Tpi1	8	43.8	26.849	1.79e-54
P48508	Glutamate--cysteine ligase regulatory subunit	Gclm	5	24.1	30.548	2.73e-71
P49242;Q6TXJ6;D3ZV98;D3ZFW0	40S ribosomal protein S3a;40S ribosomal protein S3b	Rps3a	25	67	29.945	1.67e-186
P50237	Sulfotransferase 1C1	Sult1c1	16	62.2	35.764	2.83e-130
P50475;F1LS09	Alanine--tRNA ligase, cytoplasmic	Aars	30	36.7	106.79	0
P51635	Alcohol dehydrogenase [NADP(+)]	Akr1a1	9	32.6	36.505	1.35e-51
P52631;D3Z8V9	Signal transducer and activator of transcription 3	Stat3	20	34.9	88.039	0
P52759;F8WFW1	Ribonuclease UK114	Hrsp12	7	57.7	14.303	2.86e-32
P52847	Sulfotransferase family cytosolic 1B member 1	Sult1b1	22	61.5	34.835	0
P52873	Pyruvate carboxylase, mitochondrial	Pc	47	48.3	129.78	0
P54319;D3ZDI0	Phospholipase A-2-activating protein	Plaa	10	15.2	87.083	1.54e-130
P54777;D3ZBJ9;F8WG23	Peroxisome assembly factor 2	Pex6	17	21.3	104.43	4.13e-80
P55006;F1LVY2;D3ZBV0;D3ZJP5	Retinol dehydrogenase 7	Rdh7	3	6	35.736	1.27e-104
P55051	Fatty acid-binding protein, brain	Fabp7	3	31.1	14.864	2.94e-13
P55159	Serum paraoxonase/arylesterase 1	Pon1	4	12.7	39.358	1.85e-31
P56571	ES1 protein homolog, mitochondrial		8	33.1	28.172	8.29e-169
P56574	Isocitrate dehydrogenase [NADP], mitochondrial	Idh2	7	22.3	50.967	5.7e-58
P57093	Phytanoyl-CoA dioxygenase, peroxisomal	Phyh	12	33.7	38.588	3.04e-66
P57113	Maleylacetoacetate isomerase	Gstz1	9	47.2	23.961	1.09e-88
P60123	RuvB-like 1	Ruvbl1	3	9.9	50.213	9.17e-19
P61206;P84079;P84082;F1M0J2	ADP-ribosylation factor 3;ADP-ribosylation factor 1;ADP-ribosylation factor 2	Arf3;Arf1;Arf2	4	28.7	20.601	3.49e-111
P61314;D3ZU80;D3ZXA2;D3ZF52	60S ribosomal protein L15;Ribosomal protein L15	Rpl15;RGD1560501	15	56.9	24.146	8.4e-78
P61354;D4AD41;D3ZTK5;D3ZYF9;D3ZZV8;F1M0X8	60S ribosomal protein L27	Rpl27;LOC688784;RGD1563835;RGD1565900	12	66.2	15.798	3.05e-104
P61515;F1LNS9;D4A7B1;D4AAZ6;D3ZGU1;D4A829;F1M3Q2	Putative 60S ribosomal protein L37a;60S ribosomal protein L37a	Rpl37a-ps1;LOC679823;Rpl37a	8	73.9	10.275	6.27e-39
P61589;B2RYP0;P62747;Q5XIM3	Transforming protein RhoA	Rhoa;Rhoc	4	24.4	21.782	2.4e-37
P61983	14-3-3 protein gamma;14-3-3 protein gamma, N-terminally processed	Ywhag	4	17.8	28.302	9.25e-55
P62083;Q6AY74;D4AC24;F1M8D1	40S ribosomal protein S7	Rps7	13	66.5	22.127	1.7e-166
P62193	26S protease regulatory subunit 4	Psmc1	24	56.6	49.184	9.2e-262
P62198	26S protease regulatory subunit 8	Psmc5	29	74.9	45.626	0
P62243;D3ZIE1;Q6TXJ0;D3ZT31;F1M7J4	40S ribosomal protein S8	Rps8;RGD1566369;LOC297756	16	52.4	24.205	2.12e-235
P62246;D3ZLL8;D4A8P1;D3ZZC7;D3ZS61;D3ZFC7;D3ZQT6;F1M5P5	40S ribosomal protein S15a	Rps15a;LOC100361715;LOC687680;LOC100362139	9	46.2	14.839	4.76e-214
P62260	14-3-3 protein epsilon	Ywhae	7	25.1	29.174	1.9e-71
P62268;D4A9Q3	40S ribosomal protein S23	Rps23;RGD1563570	6	30.1	15.807	8.74e-25
P62271;D3ZM33;D3ZII2;D3ZAU6;F1M6D1;D4AA93;F1M2A2	40S ribosomal protein S18	Rps18;LOC100362298;RGD1562404;RGD1561919	23	67.8	17.718	5.36e-144
P62275	40S ribosomal protein S29	Rps29	5	58.9	6.6767	5.82e-39
P62278;F1LMB4	40S ribosomal protein S13	Rps13	11	46.4	17.222	5.98e-69
P62703;D3ZX01;D4AEI1;D3ZFZ5;D3ZJQ1	40S ribosomal protein S4, X isoform	Rps4x	25	72.2	29.597	1.24e-198
P62755;D3Z9H5;D3ZBN8;D4A8N8	40S ribosomal protein S6	Rps6	19	45.4	28.68	0
P62804;F1M449	Histone H4;Osteogenic growth peptide	Hist1h4b	5	39.8	11.367	6.59e-15
P62815;D3ZZS8	V-type proton ATPase subunit B, brain isoform	Atp6v1b2	10	24.1	56.55	1.4e-61
P62828;Q66H11;Q8K586	GTP-binding nuclear protein Ran;GTP-binding nuclear protein Ran, testis-specific isoform	Ran;RGD1306195;Rasl2-9	8	35.6	24.423	1.46e-72
P62832;D3ZUS1	60S ribosomal protein L23	Rpl23	13	70.7	14.865	9.75e-186
P62845;D3ZAK6	40S ribosomal protein S15	Rps15;LOC100360484	7	46.9	17.04	2.33e-90
P62853;F1M6F4;D4AE10;D3ZCH5;D3ZWX8	40S ribosomal protein S25	Rps25;RGD1564597;RGD1563613;LOC100359763;LOC685085	9	48	13.742	8.63e-89
P62856;D3Z8D7;F1M3V7;F1M6H7;D3ZJ54;D4AAJ9;F1LYT3;F1M5Y5	40S ribosomal protein S26	Rps26;LOC100361854;RGD1562415;LOC100361756;RGD1565117	5	39.1	13.015	7.15e-23
P62890;D4A1E6;D3ZA94;F1M3Q4	60S ribosomal protein L30	Rpl30	6	56.5	12.784	5.64e-34
P62893	60S ribosomal protein L39	Rpl39	2	23.5	6.4066	6.05e-12
P62902;D3ZX87;D4ABZ9;D4ACQ2;D3ZKU5;D3ZZ60;D3ZU04;D3ZK34;D3Z8W1	60S ribosomal protein L31	Rpl31;LOC100361974;LOC690384;RGD1564839;LOC681356;RGD1565894;LOC680384	2	18.4	14.463	2.88e-42
P62907;D4A7Y6;F1LYQ7;D3ZBX4;F1M8D2;D3Z9F6	60S ribosomal protein L10a;Ribosomal protein	Rpl10a;RGD1566137;LOC680700;RGD1559639	11	41.5	24.831	5.06e-67
P62909;D3ZVH2	40S ribosomal protein S3	Rps3;RGD1560831	23	82.7	26.674	5.32e-189
P62912;D4A890;D4A412;D4A8R0;D3ZAC3;D3ZWL0;D3ZRY2;D4ACC7	60S ribosomal protein L32	Rpl32;LOC100363713	7	34.8	15.86	1.21e-50
P62914;F2Z3S4	60S ribosomal protein L11	Rpl11	11	39.9	20.252	1.32e-70
P62919;D4A6W6	60S ribosomal protein L8	Rpl8;RGD1561333	17	44.7	28.024	5.51e-137
P62944-2;P62944	AP-2 complex subunit beta	Ap2b1	10	10.7	105.69	5.88e-57
P62963;CON__P02584	Profilin-1	Pfn1	9	67.1	14.957	3.19e-186
P62982;D3ZCM1;F1LML2;Q63429;P0CG51;G3V9Z2;P62986;F1M5M5;F1M5P0;F1M4U4;F1LU69;D4A0J6;F1LYW3;F1M927;F1M282;F1M0Q4;F1M9H9;F1M516;D4A2F5;F1M148;F1M3P8;F1M2X0	Ubiquitin-40S ribosomal protein S27a;Ubiquitin;40S ribosomal protein S27a;Polyubiquitin-C;Ubiquitin;Ubiquitin-related;Polyubiquitin-B;Ubiquitin;Ubiquitin-60S ribosomal protein L40;Ubiquitin;60S ribosomal protein L40	Rps27a;Ubc;Ubb;LOC100360548;Uba52	11	69.9	17.951	9.95e-96
P62997;D3ZLN0;F1LVK5	Transformer-2 protein homolog beta	Tra2b	9	33.7	33.665	2.36e-34
P63018;D4A4S3;F1LLW5;F1LZI1;P14659;F1M2Y7;D3ZH98;F1LPF5;P55063;Q07439;F1LM52	Heat shock cognate 71 kDa protein	Hspa8	34	51.4	70.87	0
P63036	DnaJ homolog subfamily A member 1	Dnaja1	11	34.5	44.868	6.01e-156
P63039;D4ABH6;D3Z9X1;D3ZVX2;F1M6U4	60 kDa heat shock protein, mitochondrial	Hspd1	28	46.6	60.955	1.97e-170
P63102	14-3-3 protein zeta/delta	Ywhaz	6	26.9	27.771	5.45e-158
P63174;D4AD70;D3ZZH2;D3ZW57;D4A862	60S ribosomal protein L38	Rpl38;RGD1561636;LOC680353;LOC100365156	6	57.1	8.2178	6.47e-42
P63245	Guanine nucleotide-binding protein subunit beta-2-like 1	Gnb2l1	14	46.1	35.076	7.21e-134
P68035;P68136	Actin, alpha cardiac muscle 1;Actin, alpha skeletal muscle	Actc1;Acta1	2	8.8	42.019	0
P68101	Eukaryotic translation initiation factor 2 subunit 1	Eif2s1	5	27.3	36.108	3.8e-69
P68255;D3ZM53;D3ZCY6	14-3-3 protein theta	Ywhaq	4	15.9	27.778	2.15e-54
P69897	Tubulin beta-5 chain	Tubb5	3	9.7	49.67	0
P70470	Acyl-protein thioesterase 1	Lypla1	4	18.7	24.708	1.13e-11
P70567;Q6IMZ5;D3ZSG3	Tropomodulin-1	Tmod1	7	26.2	40.48	1.33e-41
P81795;D3ZSB4	Eukaryotic translation initiation factor 2 subunit 3	Eif2s3	5	15.7	51.079	4.45e-83
P82995;F1LTA7;D3ZE66;F1M5B6;D4ABF9;D3ZSM0	Heat shock protein HSP 90-alpha	Hsp90aa1	17	23.5	84.814	0
P83732	60S ribosomal protein L24	Rpl24	10	51.6	17.779	4.49e-47
P84092;D3ZSE7;F1LZR8	AP-2 complex subunit mu	Ap2m1	16	34.5	49.654	3.2e-62
P84100;F1M5A9;D3ZYJ9;F1LYA5;F1LZL7	60S ribosomal protein L19	Rpl19	16	46.4	23.466	3.92e-137
P85108;Q3KRE8	Tubulin beta-2A chain;Tubulin beta-2B chain	Tubb2a;Tubb2b	6	22.2	49.906	0
P85834;F8WFG8	Elongation factor Tu, mitochondrial	Tufm	13	31.6	49.522	3.67e-127
P85972	Vinculin	Vcl	7	9.6	116.61	3.77e-36
P85973;D3ZXK9	Purine nucleoside phosphorylase	Pnp	12	52.9	32.302	1.02e-146
P97524;D3ZSL9;D3ZUP3;F1LRI0	Very long-chain acyl-CoA synthetase	Slc27a2	22	41.8	70.693	0
P97532	3-mercaptopyruvate sulfurtransferase	Mpst	4	14.5	32.94	3.59e-21
P97536;F8WGA1;D4AAI5;Q9R0L4-2	Cullin-associated NEDD8-dissociated protein 1	Cand1	27	25.3	136.36	2.23e-255
P97608	5-oxoprolinase	Oplah	26	26.2	137.72	1.39e-216
Q01177	Plasminogen;Plasmin heavy chain A;Activation peptide;Angiostatin;Plasmin heavy chain A, short form;Plasmin light chain B	Plg	6	11.8	90.535	3.43e-25
Q02974;D3ZN65;Q02974-2	Ketohexokinase	Khk	7	18.5	32.749	6.19e-54
Q03248;D3Z8J1	Beta-ureidopropionase	Upb1	12	45.8	44.042	4.4e-219
Q03336	Regucalcin	Rgn	21	62.2	33.389	0
Q06647	ATP synthase subunit O, mitochondrial	Atp5o	13	65.3	23.397	1.91e-165
Q07071	Glucokinase regulatory protein	Gckr	12	27.6	68.917	5.84e-150
Q09073;D4A481;Q05962;Q6P9Y4;D3ZE29;F1LZS8;D3ZB81;F1LXE6;D4A2A1	ADP/ATP translocase 2;ADP/ATP translocase 1	Slc25a5;Slc25a4	13	38.6	32.901	1.54e-34
Q09167;F8WFV0;Q09167-2	Serine/arginine-rich splicing factor 5	Srsf5	7	27.5	30.891	3.84e-20
Q0VGK3	Glycerate kinase	Glyctk	9	18.5	55.187	3.62e-177
Q0ZFS8;D3ZL34;F1LT59		Srsf3;rCG_61099	13	51.2	19.329	1.12e-136
Q0ZHH6;F1LR13;Q0ZHH6-2;Q6PST4;D3ZJE7	Atlastin-3	Atl3	5	9.2	60.585	9.32e-28
Q10758;CON__H-INV:HIT000292931;CON__Q9H552;CON__P08729;CON__Q3KNV1;CON__Q9DCV7;Q6IG12;G3V712;CON__Q6ISB0;CON__Q9NSB2;CON__H-INV:HIT000016045;CON__REFSEQ:XP_092267	Keratin, type II cytoskeletal 8	Krt8	17	28.4	54.018	0
Q1JU68;F1LRG1	Eukaryotic translation initiation factor 3 subunit A	Eif3a	25	19.1	163.19	3.52e-106
Q2PQA9;F1M8F2;G3V6L4;Q6QLM7;P56536	Kinesin-1 heavy chain	Kif5b	18	24.3	109.53	6.59e-221
Q32PZ3	Protein unc-45 homolog A	Unc45a	14	15.4	103.24	2.21e-43
Q32Q06;D3ZRP6	AP-1 complex subunit mu-1	Ap1m1	13	40	48.556	7.94e-97
Q3B7U9	Peptidyl-prolyl cis-trans isomerase FKBP8	Fkbp8	5	13.9	43.555	6.92e-22
Q3KRF2;Q9Z1A6;D3ZWX5;Q6P513	Vigilin	Hdlbp	53	48.4	141.69	0
Q3MHS9;D4AD79;D3ZZG6		Cct6a	17	32.2	58.017	9.09e-164
Q3MIB4;D4A1B4;Q6TXI3	Lon protease homolog 2, peroxisomal;Lon protease homolog	Lonp2	5	11.6	94.392	2.42e-48
Q3MID4		Shpk	4	11.4	50.638	2.38e-99
Q3MIE0	Enoyl-CoA hydratase domain-containing protein 3, mitochondrial	Echdc3	6	22	32.385	1.33e-18
Q3MIE4		Vat1	6	19.6	43.118	2.61e-32
Q3T1J1;G3V7J7;D3ZWY2	Eukaryotic translation initiation factor 5A-1	Eif5a;Eif5a2	5	18.8	16.832	1.19e-22
Q3T1K5	F-actin-capping protein subunit alpha-2	Capza2	9	53.8	32.967	2.99e-202
Q3T1L0	Aldehyde dehydrogenase family 16 member A1	Aldh16a1	17	22.9	85.413	1.2e-129
Q497B0	Omega-amidase NIT2	Nit2	19	52.5	30.701	1.63e-302
Q499N6;D3ZK51	UBX domain-containing protein 1	Ubxn1	5	22.2	33.581	8.84e-20
Q499Q4;P38652;D3ZSP5	Phosphoglucomutase-1	Pgm1	13	27	61.389	1.51e-44
Q499R7		Ppa1	10	36.9	37.676	2.11e-155
Q4AEF8;D4A4V0	Coatomer subunit gamma	Copg	17	28.4	97.613	0
Q4FZT9	26S proteasome non-ATPase regulatory subunit 2	Psmd2	19	28	100.19	3.63e-259
Q4G079		Aimp1	7	33.3	34.574	1.6e-194
Q4KLL7		Vps4b	5	14.4	49.451	4.02e-99
Q4KLP0;D3ZZJ9;F1LQZ8	Probable 2-oxoglutarate dehydrogenase E1 component DHKTD1, mitochondrial	Dhtkd1;LOC100362392	6	9.1	102.64	3.88e-35
Q4KLZ6	Bifunctional ATP-dependent dihydroxyacetone kinase/FAD-AMP lyase (cyclizing);ATP-dependent dihydroxyacetone kinase;FAD-AMP lyase (cyclizing)	Dak	25	47.9	59.443	0
Q4KM62	Palmdelphin	Palmd	5	16.9	62.418	5.27e-21
Q4KM73;D3ZX23	UMP-CMP kinase	Cmpk1	11	66.3	22.169	8.54e-75
Q4KM74	Vesicle-trafficking protein SEC22b	Sec22b	10	55.8	24.74	2.89e-149
Q4V7E8;D3ZT35;D4A5G3;F1LVF2	Leucine-rich repeat flightless-interacting protein 2	Lrrfip2	4	11.4	49.772	2.37e-39
Q4V8H5		Dnpep	14	40.2	52.555	2.59e-234
Q4V8I5	ADP-ribosylation factor-like protein 6-interacting protein 4	Arl6ip4	4	26	25.769	6.16e-48
Q505J8	Phenylalanine--tRNA ligase alpha subunit	Farsa	14	31.5	57.719	0
Q505J9;Q7TP35	ATPase family AAA domain-containing protein 1	Atad1	4	14.7	40.717	4.16e-26
Q562C4	Methyltransferase-like protein 7B	Mettl7b	10	33.6	27.904	8.58e-115
Q58FK9;G3V827;Q08415;Q08415-2;D4A0T4;D4A635;F1M572	Kynurenine--oxoglutarate transaminase 3	Ccbl2	10	26	51.044	1.12e-103
Q5BJN1		Stard10	4	19	32.904	1.43e-21
Q5BJN7;P62864	40S ribosomal protein S30	Fau	2	8.3	14.372	1.19e-08
Q5BJQ0	Chaperone activity of bc1 complex-like, mitochondrial	Adck3	3	7.7	72.225	1.77e-49
Q5BJT0;D3ZE69	Arginine and glutamate-rich protein 1	Arglu1	11	29.9	32.887	3.42e-25
Q5D059;P61980	Heterogeneous nuclear ribonucleoprotein K	Hnrnpk	7	18.5	51.028	7.63e-182
Q5EBC0;D3ZFC6		Itih4	8	10.5	103.75	6.16e-33
Q5EBD0;Q99MS0	SEC14-like protein 2	Sec14l2	5	13.4	46.205	1.67e-19
Q5FVR5;D3ZYP4	Acyl-coenzyme A amino acid N-acyltransferase 2	Acnat2;Acnat1	7	22	46.01	3.38e-84
Q5FWT1	Protein FAM98A	Fam98a	2	5.2	55.07	2.57e-29
Q5HZE4	Methylthioribose-1-phosphate isomerase	Mri1	8	16.5	39.587	6.08e-30
Q5HZY2;Q6AY18	GTP-binding protein SAR1b	Sar1b;Sar1a	3	15.2	22.41	3.02e-07
Q5I0K1		Pipox	4	15.4	43.89	2.76e-12
Q5I0M2	Nicotinate-nucleotide pyrophosphorylase [carboxylating]	Qprt	5	18.1	31.297	2.17e-36
Q5I0N4;Q62730	Estradiol 17-beta-dehydrogenase 2	Hsd17b2	2	7.6	42.039	5.92e-09
Q5M7U6;D3ZEA6;D3ZEF5	Actin-related protein 2	Actr2	13	37.6	44.733	2.06e-116
Q5M849		Ifi35	5	20.6	31.764	1.54e-71
Q5M875;D3ZHH7;D4A675	17-beta-hydroxysteroid dehydrogenase 13	Hsd17b13	9	30.3	33.494	7.96e-100
Q5M884		Eci3	12	40.6	33.686	5.44e-71
Q5PPL3	Sterol-4-alpha-carboxylate 3-dehydrogenase, decarboxylating	Nsdhl	9	21.5	40.411	3.15e-35
Q5PQU1;P01048	T-kininogen 1;T-kininogen 1 heavy chain;T-kinin;T-kininogen 1 light chain	Kng1;Map1	3	13.3	47.764	1.49e-21
Q5RJR8	Leucine-rich repeat-containing protein 59	Lrrc59	8	26.4	34.869	1.19e-36
Q5RK30	Ribosome maturation protein SBDS	Sbds	3	15.2	28.752	2.05e-120
Q5RKH2		Galk1	16	35.7	42.376	1.02e-221
Q5RKI0	WD repeat-containing protein 1	Wdr1	22	50.8	66.181	0
Q5RKI5		Flii	10	12.4	144.86	2.49e-67
Q5U2S7;D4A341		Psmd3	21	37.2	60.687	0
Q5U2T9		Fkbp5	2	4.6	50.964	6.64e-07
Q5U2U5		Plin2	6	18.2	46.263	2.32e-42
Q5U2U8		Bag3	5	9.4	61.49	1.24e-39
Q5U302;D4A6H8		Ctnna1	13	21	100.24	2.87e-212
Q5XFW8	Protein SEC13 homolog	Sec13	4	15.8	35.547	4.22e-86
Q5XI32;D3ZPF3;D3Z8M9;F1M1E3	F-actin-capping protein subunit beta	Capzb	13	40.4	30.628	4.94e-122
Q5XI34;D4A1Y3;Q4QQT4		Ppp2r1a	13	25.3	65.322	2.31e-209
Q5XI55;Q5XI55-2;F1LLZ5	Peptide-N(4)-(N-acetyl-beta-glucosaminyl)asparagine amidase	Ngly1	9	14.6	74.676	3.51e-20
Q5XI73	Rho GDP-dissociation inhibitor 1	Arhgdia	3	23.5	23.407	4.19e-12
Q5XI81;F1LSD7;F1LZ14;F1M2C2;F1M3Y6;E9PSS4;Q80WE1;Q80WE1-2;E9PSS6;E9PTH3	Fragile X mental retardation syndrome-related protein 1	Fxr1;Fxr2	6	11.6	63.947	3.22e-23
Q5XIC1	Mannose-1-phosphate guanyltransferase alpha	Gmppa	5	13.3	46.191	1.08e-17
Q5XIC6;D3Z8B3;D3Z936		Psmd12	11	28.5	52.936	7.88e-126
Q5XIF6	Tubulin alpha-4A chain	Tuba4a	8	16.1	49.924	0
Q5XIH7;D4A278	Prohibitin-2	Phb2	7	26.4	33.312	6.36e-18
Q5XIM9	T-complex protein 1 subunit beta	Cct2	13	30.7	57.458	1.71e-121
Q5XIU5;F1M7S2	Proteasome inhibitor PI31 subunit	Psmf1	3	19.9	29.854	1.47e-15
Q60587	Trifunctional enzyme subunit beta, mitochondrial;3-ketoacyl-CoA thiolase	Hadhb	11	33.5	51.414	1.85e-66
Q62669		MGC72973	7	63.3	16.022	4.33e-90
Q62991;D3ZNA2;D3ZYJ4;F1LT51	Sec1 family domain-containing protein 1	Scfd1	9	22.4	72.262	3.42e-111
Q63028;D3ZZ99;Q63028-2	Alpha-adducin	Add1	2	4.1	80.354	1.3e-07
Q63041	Alpha-1-macroglobulin;Alpha-1-macroglobulin 45 kDa subunit	A1m	19	14.3	167.12	6.37e-186
Q63081	Protein disulfide-isomerase A6	Pdia6	11	29.3	48.173	1.79e-145
Q63150	Dihydropyrimidinase	Dpys	15	35.5	56.814	1.34e-234
Q63276	Bile acid-CoA:amino acid N-acyltransferase	Baat	16	48.6	46.464	0
Q63355;D4A5Q0;F1LQH7;D3ZVF7	Unconventional myosin-Ic	Myo1c	5	7.3	119.81	9.9e-28
Q63356;F1LS04;D4A7X9;F1M3K9	Unconventional myosin-Ie	Myo1e	4	3.8	126.83	1.98e-13
Q63357;D3ZKZ9;F1LQ75	Unconventional myosin-Id	Myo1d	22	29.3	116.09	4.47e-216
Q63570;F1LZ09	26S protease regulatory subunit 6B	Psmc4	22	49.8	47.408	1.23e-212
Q63584;F1LYL3;F1LWT3	Transmembrane emp24 domain-containing protein 10	Tmed10	4	21.5	24.857	3.31e-16
Q63610-2;Q63610-3;F2Z3T2		Tpm3	2	11.7	28.72	0
Q63610;F1LRP5;F1M931;Q9QX07	Tropomyosin alpha-3 chain	Tpm3	9	27.4	29.006	0
Q63716	Peroxiredoxin-1	Prdx1	13	50.3	22.109	3.73e-122
Q63798	Proteasome activator complex subunit 2	Psme2	3	16	26.857	3.52e-53
Q63910		LOC287167	4	36.6	15.524	1.19e-17
Q64057	Alpha-aminoadipic semialdehyde dehydrogenase	Aldh7a1	13	27.5	58.748	2.57e-49
Q641Y8	ATP-dependent RNA helicase DDX1	Ddx1	10	14.9	82.496	5.17e-126
Q641Z6;F8WFQ1;Q4V8H8	EH domain-containing protein 1	Ehd1	11	34.1	60.602	1.11e-245
Q64232	Trans-2,3-enoyl-CoA reductase	Tecr	4	8.1	36.122	5.15e-11
Q642E2;D3ZJD3;D3ZEI0;P17702;D3ZG08;D4A8B6;Q6TUD7	60S ribosomal protein L28	Rpl28;LOC100362069;LOC690096;RGD1565183	16	67.2	15.733	1.45e-126
Q64428;F1M9X9	Trifunctional enzyme subunit alpha, mitochondrial;Long-chain enoyl-CoA hydratase;Long chain 3-hydroxyacyl-CoA dehydrogenase	Hadha	22	27.7	82.664	4.13e-171
Q64550;Q6T5F2;Q6T5E8;Q6T5F0;Q6T5F1;Q6T5E7;Q6T5F3;F1MA28;P20720;Q64633;Q64637;Q64638;Q64634	UDP-glucuronosyltransferase 1-1;UDP-glucuronosyltransferase 1-2;UDP-glucuronosyltransferase 1-7;UDP-glucuronosyltransferase 1-3;UDP-glucuronosyltransferase 1-5;UDP-glucuronosyltransferase 1-8	Ugt1a1;Ugt1a2;Ugt1a7c;Ugt1a3;Ugt1a8;Ugt1a9;Ugt1	2	5	59.662	3.88e-19
Q64602	Kynurenine/alpha-aminoadipate aminotransferase, mitochondrial	Aadat	10	25.4	47.784	1.35e-102
Q64611;F1LPX2	Cysteine sulfinic acid decarboxylase	Csad	15	36.7	55.248	9.95e-86
Q64620	Serine/threonine-protein phosphatase 6 catalytic subunit	Ppp6c	3	10.8	35.159	6.76e-10
Q64640	Adenosine kinase	Adk	7	17.2	40.133	1.38e-26
Q66H80	Coatomer subunit delta	Arcn1	11	24.9	57.199	5.26e-41
Q66HA8;F8WFH0;F1M3G6;F1LRV4;O88600	Heat shock protein 105 kDa	Hsph1	12	16.7	96.417	1.66e-66
Q66HD0;Q66HD0-2;D3ZUA3	Endoplasmin	Hsp90b1	26	35.8	92.77	0
Q66HF3;Q6UPE1	Electron transfer flavoprotein-ubiquinone oxidoreductase, mitochondrial	Etfdh	5	8.6	68.163	1.02e-09
Q66HM2;P18484;D4A101	AP-2 complex subunit alpha-2	Ap2a2	13	15.2	104.17	4.41e-174
Q66X93;D4A8Y5;D3ZH86	Staphylococcal nuclease domain-containing protein 1	Snd1	11	17.3	101.95	1.67e-96
Q68FP2	Serum paraoxonase/lactonase 3	Pon3	3	10.7	39.458	2.47e-14
Q68FQ0	T-complex protein 1 subunit epsilon	Cct5	17	37.5	59.536	1.15e-201
Q68FR6;F1M5E1	Elongation factor 1-gamma	Eef1g	11	24	50.06	2.49e-33
Q68FS1	Cytosolic Fe-S cluster assembly factor NUBP2	Nubp2	3	13.3	28.926	1.06e-24
Q68FS4;Q68FS4-2	Cytosol aminopeptidase	Lap3	10	25	56.149	1.87e-56
Q68FT7		Farsb	8	14.9	65.651	1.3e-51
Q68FU3	Electron transfer flavoprotein subunit beta	Etfb	9	42.4	27.687	1.32e-46
Q68G19;P36511	UDP-glucuronosyltransferase 2B15	Ugt2b15	4	13.6	61.026	4.34e-33
Q68G31	Phenazine biosynthesis-like domain-containing protein	Pbld	14	56.6	31.687	5.7e-288
Q6AXS5;Q6AXS5-2	Plasminogen activator inhibitor 1 RNA-binding protein	Serbp1	9	26.3	44.754	2.15e-100
Q6AXW2;P70566		Tmod3	18	54.8	39.471	0
Q6AY58		Bcap31	4	11	27.911	8.89e-10
Q6AYD3		Pa2g4	5	16.5	43.656	2.24e-54
Q6AYD5		Gspt1	6	9.7	68.751	5.81e-26
Q6AYH5	Dynactin subunit 2	Dctn2	12	43	44.147	2.2e-165
Q6AYI1;D4A9J1		Ddx5	19	30.7	69.238	3.78e-166
Q6AYK8	Eukaryotic translation initiation factor 3 subunit D	Eif3d	4	10.8	63.988	1e-43
Q6AYS7;Q6PTT0	Aminoacylase-1A	Acy1a	12	30.9	45.804	1.6e-50
Q6AYS8	Estradiol 17-beta-dehydrogenase 11	Hsd17b11	3	15.1	32.937	4.38e-14
Q6AYT3	tRNA-splicing ligase RtcB homolog		18	41	55.249	1.51e-293
Q6AYW2;P04176	Phenylalanine-4-hydroxylase	Pah	26	56.3	51.819	0
Q6DGG1;F1M2R0;F1M5R3	Abhydrolase domain-containing protein 14B	Abhd14b	9	46.2	22.618	1.68e-178
Q6I7R1		Dhrs7	3	9.3	36.402	2.81e-56
Q6IMY8		Hnrnpu	14	18.5	87.731	6.41e-175
Q6IN39;P97852	Peroxisomal multifunctional enzyme type 2;(3R)-hydroxyacyl-CoA dehydrogenase;Enoyl-CoA hydratase 2	Hsd17b4	23	34	81.088	6.78e-215
Q6MG49;D3ZX75;Q6MG49-2	Large proline-rich protein BAG6	Bag6	20	23.2	120.01	5.94e-130
Q6P0K8	Junction plakoglobin	Jup	15	23	81.8	4.23e-44
Q6P3V8		Eif4a1	11	26.1	46.153	0
Q6P3V9;P50878	60S ribosomal protein L4	Rpl4	32	51.8	47.3	0
Q6P502;F1M1I0	T-complex protein 1 subunit gamma	Cct3	27	53.8	60.646	3.32e-290
Q6P685;D3ZBJ7		Eif2s2	4	11.4	38.243	8.31e-14
Q6P6U2;Q63569;D3ZF94;D3ZL65	26S protease regulatory subunit 6A	Psmc3	24	56.1	49.548	2.31e-255
Q6P7B0;F8WFH8	Tryptophan--tRNA ligase, cytoplasmic;T1-TrpRS;T2-TrpRS	Wars	7	22.7	54.143	1.35e-171
Q6P7R8;D3ZPU3	Estradiol 17-beta-dehydrogenase 12	Hsd17b12	6	18.3	34.84	1.31e-15
Q6P9V7;Q63797;F1M0Q8;F1M5C5	Proteasome activator complex subunit 1	Psme1	4	18.9	28.635	1.35e-38
Q6PCT9		Psmd6	7	21.6	45.598	1.22e-71
Q6PDV7;D4A1P2;D3ZXN2	60S ribosomal protein L10	Rpl10;Rpl10l	21	67.8	24.604	2.62e-185
Q6PDV8;F1M3S4;D3ZSC4;P47198		LOC100363800;LOC100360057	6	30.5	14.759	2.91e-60
Q6PDW1;D3ZMD2;D3ZHB3;D3ZJZ4;P63324;F1M185;D3ZG05;D3ZV36;F1M8X3	40S ribosomal protein S12	LOC100359593;LOC100360558;LOC100360573;LOC100360642;Rps12	8	57.6	14.515	5.29e-63
Q6Q0N1;F1LUD0	Cytosolic non-specific dipeptidase	Cndp2	8	19.2	52.693	5.12e-32
Q6QI09;Q6PCU0;P35435	ATP synthase gamma chain;ATP synthase subunit gamma, mitochondrial	LOC100360100;Atp5c1	10	15.8	67.72	3.5e-101
Q6QI93;Q3ZAV8	Enhancer of mRNA-decapping protein 4	Edc4	11	10.7	163.25	5e-113
Q6TMG5;F1LM08	NF-kappa-B essential modulator	Ikbkg	6	13.3	48.066	1.96e-32
Q6TXG7;Q4KLG7	Serine hydroxymethyltransferase	Shmt1	18	29.1	75.373	5.9e-198
Q71TY3;D3ZNZ8	40S ribosomal protein S27	Rps27;LOC100362405	3	15.5	9.461	3.22e-34
Q75N33;D3ZUF6;F1LNQ6;D4AAW2	Protein transport protein Sec16B	Sec16b	15	20.6	116.9	5.9e-105
Q793F9;Q6IRG3;Q6GX84	Vacuolar protein sorting-associated protein 4A	Vps4a	6	16.9	48.906	8.56e-31
Q794E4;F1LV61	Heterogeneous nuclear ribonucleoprotein F;Heterogeneous nuclear ribonucleoprotein F, N-terminally processed	Hnrnpf	4	13	45.729	1.08e-73
Q7M0E3;D4A315	Destrin	Dstn	6	35.8	18.533	6.52e-140
Q7TP42		Sec62	7	6.8	67.93	4.86e-22
Q7TP52	Carboxymethylenebutenolidase homolog	Cmbl	3	14.7	27.903	8.76e-20
Q7TP57;F1M9D6;F1M4K4		Stat4	24	23.9	134.61	0
Q7TPB1	T-complex protein 1 subunit delta	Cct4	15	36.5	58.099	3.89e-109
Q7TPJ1;A1L1K2		Igtp	13	16.1	161.63	2.38e-152
Q7TT49;G3V6C9;O54874;D3ZR44;D4A247	Serine/threonine-protein kinase MRCK beta	Cdc42bpb	10	7.2	194.89	3.31e-50
Q80Z29;D4A8T1;G8JLR4	Nicotinamide phosphoribosyltransferase	Nampt	25	45.2	55.437	0
Q8CG45	Aflatoxin B1 aldehyde reductase member 2	Akr7a2	12	35.1	40.675	1.16e-51
Q8CHM7;F1M6X0	2-hydroxyacyl-CoA lyase 1	Hacl1	13	28.4	63.615	1.64e-208
Q8K4C0	Dimethylaniline monooxygenase [N-oxide-forming] 5	Fmo5	7	12.6	60.055	1.94e-54
Q8K4V4;G3V8U4;Q8K4V4-2	Sorting nexin-27	Snx27	4	10.9	61.014	8.15e-37
Q8SEZ5;P00406	Cytochrome c oxidase subunit 2	Mt-co2;Mtco2	4	19.4	25.928	8.85e-16
Q8VBU2;Q8VBU2-2	Protein NDRG2	Ndrg2	9	38.8	40.779	8.51e-171
Q8VIF7;F1LRJ9	Selenium-binding protein 1	Selenbp1	17	48.5	52.531	3.3e-100
Q91XR8;F8WFK6;P36970;P36970-2	Phospholipid hydroperoxide glutathione peroxidase, nuclear;Glutathione peroxidase;Phospholipid hydroperoxide glutathione peroxidase, mitochondrial	Gpx4	3	16.2	29.352	4.92e-13
Q920J4;D3ZW98	Thioredoxin-like protein 1	Txnl1	7	38.1	32.249	1.79e-105
Q920P0	L-xylulose reductase	Dcxr	7	35.2	25.719	9.5e-43
Q920R3	Fatty acid desaturase 1	Fads1	5	14.8	52.481	4.04e-19
Q923K9;Q923K9-2;F1LNL0;Q923K9-3;Q923K9-4;Q66H68;D3ZAE2	APOBEC1 complementation factor	A1cf	15	41.4	65.619	5.35e-152
Q99J82	Integrin-linked protein kinase	Ilk	13	27.7	51.373	3.39e-49
Q99MI5		Srm	3	13.9	33.997	1.91e-61
Q99ND5;P49890	Estrogen sulfotransferase, isoform 6	ste2	2	12.9	35.361	4.98e-41
Q99ND8;D3ZLY2;P35815-2;D3ZAK9;Q642F2;P35815;P20650	Protein phosphatase 1B;Protein phosphatase 1A	Ppm1b;Ppm1a	3	6.5	51.009	1.03e-09
Q99PD4;D4A992;D3ZXP7	Actin-related protein 2/3 complex subunit 1A	Arpc1a	9	31.1	41.599	8.92e-75
Q9EPH8;B5DF80;G3V9N0;D3ZSR2;D4AC14;D4A233;F1M8Y9	Polyadenylate-binding protein 1	Pabpc1;Pabpc3	3	6.6	70.7	4.43e-33
Q9EPJ0	Nuclear ubiquitous casein and cyclin-dependent kinases substrate	Nucks1	3	5.3	27.14	2.05e-09
Q9EQ76;Q8K4B7;G3V6F2	Dimethylaniline monooxygenase [N-oxide-forming] 3	Fmo3	16	29.8	59.96	2.23e-61
Q9EQX9;D3ZUH7	Ubiquitin-conjugating enzyme E2 N	Ube2n	3	29.6	17.124	4.35e-15
Q9ER34;F1M0K2	Aconitate hydratase, mitochondrial	Aco2	3	5.6	85.432	5.1e-140
Q9ES38	Bile acyl-CoA synthetase	Slc27a5	20	27.5	76.265	8.14e-196
Q9JHL4;Q9JHL4-2;Q9JHL4-3;Q9JHL4-4	Drebrin-like protein	Dbnl	8	26.4	48.612	2.15e-155
Q9JJ19	Na(+)/H(+) exchange regulatory cofactor NHE-RF1	Slc9a3r1	8	28.9	38.83	1.43e-32
Q9JKB7;Q9WTT6	Guanine deaminase	Gda	14	37.9	50.9	6.3e-192
Q9JMB5;D3ZS63	Proteasomal ubiquitin receptor ADRM1	Adrm1	2	7.6	42.102	2.34e-28
Q9QUH3	Apolipoprotein A-V	Apoa5	6	28.1	41.426	3.67e-87
Q9QXQ0;Q8R4I6;D3ZCV0	Alpha-actinin-4	Actn4	23	34.7	104.91	0
Q9QZA2;F1LLY4	Programmed cell death 6-interacting protein	Pdcd6ip	24	32.6	96.63	6.91e-135
Q9QZU7	Gamma-butyrobetaine dioxygenase	Bbox1	6	14	44.545	8.17e-20
Q9R063;D3ZEN5;Q9R063-2	Peroxiredoxin-5, mitochondrial	Prdx5	6	35.7	22.178	4.98e-11
Q9R0T3	DnaJ homolog subfamily C member 3	Dnajc3	7	16.5	57.56	1.98e-25
Q9WU49	Calcium-regulated heat stable protein 1	Carhsp1	4	59.9	15.906	3.23e-26
Q9WU74;Q9WU74-2;Q9WU74-3	Lipolysis-stimulated lipoprotein receptor	Lsr	5	11.8	65.776	2.08e-20
Q9WU82	Catenin beta-1	Ctnnb1	6	12	85.454	4.57e-35
Q9WUC4	Copper transport protein ATOX1	Atox1	2	32.4	7.2924	2.15e-12
Q9WVJ6		Tgm2	24	37.2	76.934	5.08e-259
Q9WVK3	Peroxisomal trans-2-enoyl-CoA reductase	Pecr	8	36.3	32.433	4.73e-51
Q9Z122;F1LNU6	Fatty acid desaturase 2	Fads2	6	17.3	52.38	8.62e-19
Q9Z270;Q9Z269	Vesicle-associated membrane protein-associated protein A	Vapa	5	20.9	27.841	3.74e-14
Q9Z2M4	Peroxisomal 2,4-dienoyl-CoA reductase	Decr2	4	10.6	31.292	1.81e-48
Q9Z339;Q6AXR6;D3ZJM9;Q6AXV9	Glutathione S-transferase omega-1	Gsto1	8	35.7	27.669	5.88e-71

## Sheet: Chow+Insulin
Protein.IDs	Protein.names.CI	Gene.names	Unique.Peptides	Unique.Sequence.Coverage	Molecular.Weight.kDa	PEP
A0JPJ7;D3ZG25	Obg-like ATPase 1	Ola1	3	7.8	44.535	6.99e-09
B0BMS8;Q64122	Myosin regulatory light polypeptide 9	Myl9	4	21.5	19.854	1.43e-212
B0BMW0;P61107	Ras-related protein Rab-14	Rab14	4	31.6	23.897	2.08e-53
B0BMY6		LOC100362554	3	8.8	40.447	6.58e-12
B0BN52;D3ZNM9;F1M3F5		Mtch2	3	10.6	33.528	2.42e-05
B0BN81;P24050	40S ribosomal protein S5;40S ribosomal protein S5, N-terminally processed	Rps5	12	49.5	22.906	9.17e-85
B0BN93	26S proteasome non-ATPase regulatory subunit 13	Psmd13	12	38	42.817	2.88e-103
B0BNA7;F1LR46;F1LUP5	Eukaryotic translation initiation factor 3 subunit I	Eif3i	7	20.9	36.46	1.13e-27
B0BNE5	S-formylglutathione hydrolase	Esd	5	15.2	31.363	1.38e-17
B0BNF9		Hao1	8	27.6	40.968	1e-50
B0K010		Txndc17	2	8.9	14.092	1.32e-05
B0K031;P05426;F1M6K0;F1M087;D4A1F7;Q7TP62;D4A4I8;F1LTQ3;F1M1V2;F1LXU1;F1LUE9;F1LWQ5;F1LV62	60S ribosomal protein L7	Rpl7	27	60.4	30.313	2.08e-153
B1H249		Gnpnat1	2	15.8	20.821	1.12e-52
B1H267	Sorting nexin-5	Snx5	4	14.1	46.793	6.51e-39
B1WBN3;P11960	2-oxoisovalerate dehydrogenase subunit alpha, mitochondrial	Bckdha	7	27.1	50.668	1.82e-56
B1WBY7		Erlin1	2	7.5	39.266	1.58e-24
B1WC26		Nans	4	17.5	40.051	9.58e-42
B2GUV7;F1M3V8	Eukaryotic translation initiation factor 5B	Eif5b	4	6.7	137.68	5.33e-42
B2GUY2;D4A1F1	Transferrin receptor protein 2	Tfr2	5	6.5	88.327	1.81e-16
B2GUZ5;F8WFI5	F-actin-capping protein subunit alpha-1	Capza1	7	36.4	32.909	1.1e-115
B2GV15		Dbt	10	17.8	53.273	8.46e-37
B2GV24;D3ZK82	E3 UFM1-protein ligase 1	Ufl1	5	8.6	89.584	3.33e-40
B2GV38	Ubiquitin-like protein 4A	Ubl4a	7	47.8	17.79	2.4e-30
B2RYG6	Ubiquitin thioesterase OTUB1	Otub1	2	12.5	31.27	1.89e-50
B2RYH2;D3ZBI1		Trim14	7	17.3	49.849	3.75e-26
B2RYI2;D3ZVL3		Srp68	13	30.9	70.491	2.32e-177
B2RYJ3;D3ZK73;D3ZK74;D3ZNZ7;D3ZL69		RGD1563853	7	12.5	87.773	1.25e-105
B2RYN3		Eef1e1	3	19.5	19.842	1.73e-32
B2RZ72		Arpc4	7	48.8	19.667	3.98e-60
B2RZA9;F1LTT5		Ube2l3	4	42.2	17.861	2.32e-109
B2RZD1		Sec61b	2	27.1	9.9884	1.6e-26
B2RZD4;D4A4W9;F1LQ14;P11250;D3ZHM1	60S ribosomal protein L34	Rpl34;Rpl34-ps1;RGD1561086	7	33.3	13.293	4.41e-20
B2RZD6		Ndufa4	5	47.6	9.3267	1.37e-16
B3DMA2;F1LYZ0	Acyl-CoA dehydrogenase family member 11	Acad11	16	20.2	87.37	8.62e-63
B5DEG8;F1LYY0;F1M7Y8		Sec24c	9	12.7	118.52	3.83e-52
B5DEM5;F1LSW7;Q63507;Q6TUH8;D3ZHE6;D3ZZY6	60S ribosomal protein L14	Rpl14;LOC306079;LOC680579	10	39.7	23.78	1.96e-43
B5DEN5;Q7TPK5		Eef1b2	3	16	24.675	3.79e-34
B5DF46		Pmm2	8	34.7	27.708	3.08e-29
B5DF60;Q6VV72	Eukaryotic translation initiation factor 1A	Eif1ax;Eif1a	2	15.3	16.46	1.7e-12
B5DF65		LOC681468	4	25.2	22.094	3.67e-11
B5DFC3		Sec23a	13	24.1	86.161	0
B5DFC8;D3ZX16	Eukaryotic translation initiation factor 3 subunit C	Eif3c	10	12.4	105.43	7.7e-140
D3Z8I7		Gstt1	8	25.2	23.381	9.16e-207
D3Z8X6		Dtx3l	19	27.9	83.102	1.07e-125
D3Z905;G3V699;Q9Z2Q1;D4A5M5;Q9Z2Q1-2;D4ADQ9;D3Z9R0	Protein transport protein Sec31A	Sec31a	30	29.1	133.43	0
D3Z941		Mars	19	27.1	101.58	5.37e-124
D3Z982;Q6PDU1;F1LUT2	Serine/arginine-rich splicing factor 2	Srsf2	7	26.6	28.869	1.1e-137
D3Z9J5;Q6AY86	Vacuolar protein sorting-associated protein 26A	Vps26a	7	33.1	41.534	3.29e-144
D3Z9M4;F1M651;F1M3K5;F1MA94;D3ZMF0;D3Z9Z0		Ank1	7	6	207.49	3.86e-55
D3ZAF6		Atp5j2	3	34.1	10.452	1.53e-07
D3ZAP2;C0JPT7;D3ZXX2		Flna	38	19.8	281.29	0
D3ZBA1;D3ZJP8;E9PSW4;E9PTJ9		Aox4	32	29.7	146.93	0
D3ZBW0;D4A2X2;Q05096;F1LSW1;D3ZC71;Q05096-2;D3ZNP7;Q05096-3	Unconventional myosin-Ib	Myo1b	20	21.3	132.02	5e-169
D3ZC88;P62630;F1M6C2;P62632;D3ZA96;D4A0X4	Elongation factor 1-alpha;Elongation factor 1-alpha 1	LOC100360413;Eef1a1	19	42.6	50.107	0
D3ZCS9		RGD1309350	5	34	16.01	1.69e-28
D3ZD13;D4A8D5;D3ZHA0;D3ZZ63		Flnb	61	32.1	277.84	0
D3ZD23		Abce1	7	17	67.3	8.08e-32
D3ZDW1;D3ZIC2		Uroc1	15	22.4	78.533	1.3e-96
D3ZE37;P62282;D3ZYK5;D3ZMX7	40S ribosomal protein S11	Rps11	16	60.6	18.701	7.46e-90
D3ZE63;P30904;D4A3P7;F1LTZ6	Macrophage migration inhibitory factor	LOC686548;Mif;RGD1560513	3	23.5	12.605	1.94e-14
D3ZEZ9;F1M155;D3ZQS5		Svil	6	5	241.94	7.18e-27
D3ZF07;P18445;D3ZI60;D3ZG03;D4AAY6;D3ZUK0;F1M5H4;F1LVD0;D3ZVI3;F1LZW1	60S ribosomal protein L27a	RGD1562402;Rpl27a;RGD1561984	6	32.4	16.587	1.23e-25
D3ZF26		Tnks1bp1	16	14.5	180.01	3.95e-231
D3ZFA8;P04644;D3ZHU9;D3ZKG6;D3ZM01;F1M5B1;F1M238;D3ZL23	40S ribosomal protein S17	LOC100362366;Rps17;LOC100361180;RGD1559955	10	65.2	15.468	2.47e-144
D3ZFB2;D4A371		Luc7l3	4	6.7	58.423	5.38e-12
D3ZFF9;D3ZUL6;G3V9U0;D3ZQ17		Acss2	7	12.3	80.583	6.22e-92
D3ZFJ2			2	4.7	39.661	6.04e-28
D3ZFJ6		Lactb	5	11.6	60.42	5.21e-22
D3ZFQ8		Cyc1	2	8.9	35.434	6.34e-06
D3ZFS8;G3V9Z3;P21396	Amine oxidase [flavin-containing] A	Maoa	2	5.3	59.581	1.4e-05
D3ZFX4;B2RYN0;D3ZU02		Pgm3	9	20.7	60.845	7.02e-76
D3ZFY0		Sephs1	6	28.3	42.892	1.52e-35
D3ZG88		Sssca1	2	17.6	21.318	8.6e-20
D3ZGE6;D3ZRB0;Q66HL2		Cttn	18	39.7	61.077	1.77e-108
D3ZHR2		Abcd1	5	9.9	81.937	3.75e-21
D3ZHX7;D3Z8U7;F1LQB5;Q5M7W5;D3ZHY7;D3ZHX8;Q5M7W5-2	Microtubule-associated protein;Microtubule-associated protein 4	Map4	6	7.9	116.81	5.59e-33
D3ZHY1;Q5XHY5;D4ABM0;Q68FW7;F1LQP2;D3Z7Y7	Threonine--tRNA ligase, cytoplasmic	Tars	24	33	83.388	2.42e-299
D3ZI23;G3V9P0;Q9WTV5;D4A4H7	26S proteasome non-ATPase regulatory subunit 9	Psmd9	5	18	31.758	7.18e-21
D3ZIA3;F1LN56;Q99MZ8	LIM and SH3 domain protein 1	Lasp1	13	41.8	29.942	5.75e-111
D3ZJ95;Q7TQ70;P06399;P06399-2;F1M5M0	Fibrinogen alpha chain;Fibrinopeptide A;Fibrinogen alpha chain	Fga	32	39.2	86.846	0
D3ZJI3;Q6P799;D3ZJ61;D4A0E9	Serine--tRNA ligase, cytoplasmic	Sars	2	3.5	61.362	2.87e-05
D3ZJS0;P70580	Membrane-associated progesterone receptor component 1	Pgrmc1	8	28.4	24.694	1.59e-113
D3ZK05		Gsdmd	9	24.4	49.603	2.39e-70
D3ZK97;D3ZQN4;P84245;D3ZJ08;Q6LED0;D4A0P4;D3ZVW5;F1M7I7	Histone H3;Histone H3.3;Histone H3.1	LOC100360868;LOC100359421;H3f3b;Hist1h2ail;LOC691496	7	43.4	15.358	1.57e-16
D3ZKG9;F1M0Y0		RGD1307222	13	10.5	151.04	7.72e-152
D3ZL58;Q5XIT4		Nub1	4	10.3	70.296	1.85e-71
D3ZLI8;Q07984	Translocon-associated protein subunit delta	Ssr4	4	30.5	19.107	1.58e-13
D3ZLR7;D4ADT6;D4A8D9;D4ADT5		Ddx58	28	31	106.3	4.69e-173
D3ZNH4;F1LS18;D3ZWM5;G3V8B3;D4A817;Q00715;D4ABS3;D3ZLY9;D3Z8U0;G3V9C7;Q00729;F1LP73;D3ZNZ9;D3ZZP9	Histone H2B;Histone H2B type 1;Histone H2B type 1-A	Hist1h2bm;Hist1h2bl;LOC684647;LOC684797;LOC100359692;Hist1h2bd;Hist1h2bf;Hist1h2bc;Hist1h2ba;Hist3h2ba	12	58.7	15.493	3.16e-116
D3ZNU8;D4A678;Q6XDA1;REV__F1LLV5		Spta1	108	47.2	280.13	0
D3ZP30;F1LQI5;Q2TL32;D3ZZA2	E3 ubiquitin-protein ligase UBR4	Ubr4	13	3.3	575.56	1.59e-161
D3ZPN7;Q6PDW2;D4A4G9;D3ZMI8;D3ZXP5;D3ZZH9;D3Z9G3;D3ZEK2;D3ZUH0;D3ZEP1;P20280;F1LWH4;D4A7B4;D4A870;D3ZPH0;D3ZRA9;D3ZLH3;D4A219;D4A4G7;D3ZPU6;F1LY43;F1LVT4;D3ZE97;D3ZPV5;F1LV87;F1LXP6;D3ZIM9;F1LV39;D3ZKL4;D4A4U4;F1M5C7;D4A9T8;D3ZPB0;D3ZQD7;F1M361;F1M235;D3ZF08;D4A5A5;D3ZCN5;D3ZVH3;D3ZM68;F1M4U3;D3ZNN2	60S ribosomal protein L21	LOC100364176;LOC100360604;RGD1561815;RGD1562839;RGD1562469;LOC681195;LOC100361103;RGD1562923;LOC100363471;RGD1562971;Rpl21;LOC100360611;LOC686080;RGD1565370;RGD1560414;RGD1562601;RGD1565159;RGD1566270;LOC680639;RGD1564634;RGD1566326;RGD1562929	4	23.1	18.678	7.75e-86
D3ZPR0		Cse1l	9	9.5	110.21	1.98e-85
D3ZQX6;Q9EQS4		Cth	2	13.6	43.59	0
D3ZR07;D3ZFD0;F1LM91;F1M5K8;F1LNC1;D3ZHN6			138	57.2	234.36	0
D3ZRJ1;F1M7X1;P20817;D3ZNF2;D3ZMB7;D4A756;D4AB65;D3ZTC9;P24464;D3ZXY6	Cytochrome P450 4A14	Cyp4a2;Cyp4a14	3	9.9	58.465	1.31e-70
D3ZRV4;P04905;G3V983;D3ZGW4;D3ZVQ8;B0BN47	Glutathione S-transferase Mu 1	Gstm1	11	35.4	28.399	1.11e-138
D3ZS38;D4A0H4;D4AEE5		Cul2	5	7.2	86.968	7.05e-58
D3ZS68;D4A1P3;Q6AY48;D3ZPF1;F1LU04;D3ZCS3;D3ZWQ9;F1M8T3		Pcbp1	7	30.3	37.497	1.04e-223
D3ZSD1;D4A6B2;Q3KR86;D3ZDF7;F1LRP0	Mitochondrial inner membrane protein	Immt	23	33.9	87.2	1.04e-173
D3ZT90		Gcdh	7	25.7	49.713	4.96e-152
D3ZTH8;F1LT35;P62752;D4AAL7;D3ZTX9;D3ZNM1;D3ZFK7;D3ZSR8;D4A9L3;F1M1E5;D4ADV3;D3Z969;D3ZIJ2	60S ribosomal protein L23a	LOC689899;RGD1564606;Rpl23a;LOC688776;RGD1565170;RGD1562755	10	44.2	17.753	1.17e-129
D3ZTP0;REV__D4A4I9		Aldh1l2	16	21.8	101.69	3.02e-119
D3ZTT9;P61928;D3ZTX8;D4A201;D4A7Z2	Ribosomal protein L37;60S ribosomal protein L37	Rpl37-ps1;Rpl37;RGD1561310;RGD1560186	3	28.9	11.115	7.68e-08
D3ZU13;D4AD15		Eif4g1;LOC680559	9	6.4	175.7	2.91e-33
D3ZU22;P62425;F2Z3S2;D3ZPL5;D4A6B9;F1M2H8;D3ZJH5;D3ZWM2;F1M1M2;F1M2Q3;D4A8X2;F1M394;F1M4C7;D3ZNA3;F1M300;F1LYB8;F1LU72;F1M0S7;F1M0R8;F1M4Z6;D4A566;F1LZY4;D3ZD15;Q7TQ86;F1M465;D3ZVY2;F1LV49;D4A2J1;F1LT34;D4A479;D4A1S7;F1M3Q8;F1M843;F1LXH6;F1M289;D4AE05;D3ZEB2	60S ribosomal protein L7a	LOC100361311;Rpl7a;RGD1562953;LOC680161;RGD1562409;RGD1559149;RGD1563220;RGD1564370	14	34.6	30.011	1.32e-160
D3ZU44;D4A644;D3ZAY9		Map7d1	2	3.8	93.601	1.74e-18
D3ZUM0;Q01579		Gstt1	12	47.3	27.598	1.3e-206
D3ZUU8		Sec14l4	7	20.4	47.018	1.9e-36
D3ZUX5		Chchd3	6	27.8	26.434	2.39e-26
D3ZUY6;F1LM69;Q641Y0;D4AB95	Dolichyl-diphosphooligosaccharide--protein glycosyltransferase 48 kDa subunit	Ddost	4	9.5	48.555	2.16e-09
D3ZUY8;D3ZMB9		Ap2a1	4	5.2	107.67	2.64e-42
D3ZV91		RGD1305721	4	15.3	37.914	2.8e-14
D3ZVK7;D3ZZ29;G3V9C0;P0C169;P0C170;Q00728;Q4FZT6;Q64598;Q6I8Q6;A9UMV8;D3ZXP3;D3ZWE0	Histone H2A;Histone H2A type 1-C;Histone H2A type 1-E;Histone H2A type 4;Histone H2A type 3;Histone H2A type 1-F;Histone H2A.J	Hist1h2ak;LOC680322;Hist1h2ai;Hist1h2af;H2afj;H2afx	2	13.8	14.149	5.72e-98
D3ZVQ0	Ubiquitin carboxyl-terminal hydrolase	Usp5	3	5	95.778	8.71e-12
D3ZVZ4;P07150	Annexin;Annexin A1	Anxa1	2	4.9	43.592	2.19e-05
D3ZW08		Adsl	6	21.5	54.852	8.75e-68
D3ZW50;Q63448;F1M9A7;D4A3R1;REV__F1LW22;REV__F1M8V4	Acyl-coenzyme A oxidase;Peroxisomal acyl-coenzyme A oxidase 3	Acox3	18	32.3	78.569	2.93e-277
D3ZW55	Inosine triphosphate pyrophosphatase	Itpa	5	24.2	21.927	1.56e-20
D3ZW96;E9PTI1		Atp6v1h	4	12.2	55.868	3.41e-45
D3ZXH6;P24049;D3ZP66;D3Z9G9;D4AAE8;D4ACF0;Q7TPJ7;F1M302;F1LZX7;F1M5Y4	60S ribosomal protein L17	RGD1563903;Rpl17;RGD1562905;RGD1560017;RGD1565093	16	47.6	22.025	0
D3ZXY4		Aldh8a1	23	45.8	53.46	0
D3ZYU9;G3V9S9;D3ZTC8		Sec24d;Sec24d_predicted	4	5.7	113.16	5.09e-26
D3ZZ12;B5DFH4;F1M318		Papss2	34	44.9	69.956	0
D3ZZ45			2	7.1	13.138	6.05e-05
D3ZZ55;D3ZZZ9;D4A493;D4ABK8		Ctnnd1	6	9.8	104.89	1.13e-25
D3ZZ95;P39032;D4A1Q0;F1M706;D3ZJJ6;D3Z7Z2;D3Z8V5;F1M9S4	60S ribosomal protein L36	LOC100361060;Rpl36;LOC100361079;LOC100360439;LOC100359616	7	39.6	12.41	2.33e-48
D3ZZB2;D3ZS45		Pex1	14	16.1	141.4	3.25e-171
D3ZZK1;P60868	40S ribosomal protein S20	LOC100359563;Rps20	7	37.8	13.354	8.39e-245
D3ZZN4;P04646;D3ZRV7;D4A771;F1M2L1;D4A329;D3ZYY1;F1M0T2;D3ZFY4	60S ribosomal protein L35a	LOC100362338;Rpl35a;LOC100359636;LOC100359825;RGD1560900	9	49.1	12.623	2.2e-27
D3ZZU0;P85970	Actin-related protein 2/3 complex subunit 2	Arpc2	9	30	34.347	3.89e-47
D4A133		Atp6v1a	10	25	68.264	6.51e-160
D4A137;D3ZIM4;D3ZJP0;G3V9W6;P30839;D4A387;P11883	Aldehyde dehydrogenase;Fatty aldehyde dehydrogenase	Aldh3a2	18	42.6	56.842	1.75e-203
D4A1J6		Ankfy1	2	4.1	128.56	8.3e-28
D4A1Y4;D4A5T0;Q5XI21		Tom1	5	15.9	56.708	8.06e-24
D4A2K1		Hoga1	5	23.4	34.464	6.22e-74
D4A2W9;D3Z898;D3ZA81		Samhd1	3	5.6	71.702	7.44e-34
D4A323;Q6S3A0;F1MAL6;D3ZF79;Q6S396;Q6S395;Q6S398;Q6S3A3;Q6S3A1;P30427;P30427-4;P30427-2;P30427-3	Plectin	Plec	108	27.8	534.37	0
D4A354;D3ZCI0;D3ZNG1;F1LSY6;Q63060;D3Z8F7;Q68FP7	Glycerol kinase	Gk	15	28.4	61.232	1.6e-109
D4A478		Ntpcr	3	28.1	20.813	3.52e-37
D4A4D5;P02401;D3ZN03;D3ZMC4;D3ZMC5	60S acidic ribosomal protein P2	LOC498555;Rplp2;LOC100362751	8	81.7	11.706	6.35e-266
D4A4X4;F1M434		Cgn	24	25.3	136.4	0
D4A5I9;D3ZYX5;F1LWP6		Myo6	22	20	145.66	2.02e-154
D4A6S1;E9PSJ6;F1M668;F1M005		Grhpr	13	31.5	36.219	5.17e-68
D4A720;D3Z964;F1LZA3;F1M8R2		rCG_61762	6	25.6	27.377	9.75e-38
D4A746		Gmppb	5	19.7	39.902	4.21e-26
D4A7R0;B0BND9			7	15.9	75.002	1.33e-113
D4A8A0		Cad	13	8.8	243.47	6.72e-173
D4A8E3;Q3MID3	ADP-ribosylation factor GTPase-activating protein 2	Arfgap2	7	15.9	58.067	1.21e-25
D4A8T3;F1MA08		Copz1	3	27.1	20.198	6.22e-55
D4A996;F1LRB4;D4ADD2;F1LXD4;D3ZM20		Kif13b	19	14.8	203.26	2.04e-205
D4A9A6;D4A2Q2;D3ZEZ7;D3ZIP3;D3ZKF7;D4A6Q4;D3ZHS9;D3ZL97;D3ZL93;D3ZMI4;Q9WTP0-2;Q9JMB3;D3ZU77;G3V874;D3ZB32;D3ZDI1;Q9WTP0;D4ACZ3;A3E0T0;D4A9L5;D4ACZ4;D3ZLZ8;D3ZC10		Epb4.1	26	33.2	91.979	2.23e-107
D4A9I9;F1LRY5;Q64380;D4A8Z7	Sarcosine dehydrogenase, mitochondrial	Sardh	5	5.7	101.66	5.69e-14
D4A9L2		Srsf1	10	37.1	27.744	1.88e-45
D4AA63		Ubqln2	4	8.2	67.259	0
D4AAG1;P36972	Adenine phosphoribosyltransferase	Aprt	2	12.6	19.764	7.3e-06
D4AAV1		Amdhd1	12	31.3	46.57	5.99e-48
D4AB03		Fam120a	13	17.7	121.74	1.51e-236
D4AC23		Cct7	15	27.2	59.658	1.64e-83
D4ACB7;D3ZN76		LOC100360302	18	14.8	255.56	5.84e-233
D4ACB8		Cct8	13	28.1	59.588	1.63e-88
D4ACG2;D4A2Z4;D3Z9T1		Ilvbl	4	10	72.269	2.07e-46
D4ACJ1;P62850;D4A6H5;P62850-3;P62850-2;D3ZFZ8	40S ribosomal protein S24	LOC100363469;Rps24	6	36.1	15.395	2.39e-41
D4ACL3;G3V6S2;Q63270;Q62751	Cytoplasmic aconitate hydratase	Aco1	40	53.3	98.956	0
D4AD25;F1M779;P11442	Clathrin heavy chain 1	Cltc	54	35.9	192.02	0
D4ADE8;D3ZN21;Q64060;F1LQD1;D4ADV9		Ddx3x;RGD1309586	27	41.1	73.145	8.74e-195
D4ADJ6;REV__D3ZP58;REV__D3ZJB5;REV__D4A6F9;REV__D3ZMQ0		Amfr	11	23.5	72.271	4.98e-34
D4ADW8;G3V960;P10868	Guanidinoacetate N-methyltransferase	Gamt	5	25.6	28.188	2.96e-38
D4AEH3		Psmd7	8	37.8	36.491	1.4e-249
D4AEH9		Agl	29	20.8	174.33	2.49e-174
D4AEP0	Adenylosuccinate synthetase	Adss	4	12.3	50.085	3.08e-25
E2RUH2;P29315	Ribonuclease inhibitor	LOC100360501;Rnh1	5	12.5	49.919	1.32e-18
E9PSQ0;D3ZBE2;D3ZBE4		Acacb	3	2	274.67	9.81e-112
E9PSR5;D4A9N5		Trim25	10	19.8	71.089	1.55e-70
E9PT29			5	11.4	72.827	2.66e-56
E9PT65;D4A5L5			11	19.8	68.39	2.5e-112
E9PTL2;P12711;G3V7J9;P41682	Alcohol dehydrogenase class-3	Adh5	21	24.2	94.619	1.25e-248
E9PTL9		Ddx19b	2	9.1	54.216	2.35e-91
E9PTU4;E9PTI3;F1M7T3;D4A0G3;Q63862-3;Q63862;Q63862-2	Myosin-11	Myh11	88	38.4	223.8	0
E9PU16;F1M225;Q6NYB7;D3ZQP3;D3ZQP7;D3Z848;P35280;P70550;D4A8V5;P35289;P35286;P35281;D3ZGA3	Ras-related protein Rab-1A	Rab1;Rab1A	2	7	33.696	2.1e-13
F1LM19;P24090;Q7TP75	Alpha-2-HS-glycoprotein	Ahsg	3	14.8	38.167	6.72e-85
F1LM22;P08542;P19488;F1M7N8;F1M3E3	UDP-glucuronosyltransferase 2B17;UDP-glucuronosyltransferase 2B37	Ugt2b17;Ugt2b37;LOC100361864	4	8.5	60.477	1.69e-35
F1LM41;Q62667	Major vault protein	Mvp	24	33.2	96.692	8.03e-122
F1LM47;F1M6A4		Sucla2	5	9.9	50.306	3.23e-16
F1LM55		RGD1309922	6	8.1	102.79	9.68e-42
F1LMD9;P97874;D3ZNM5	Cyclin-G-associated kinase	Gak	4	5.1	143.71	4.79e-30
F1LMG2;Q68FT5	Betaine--homocysteine S-methyltransferase 2	Bhmt2	8	27	39.799	1.06e-76
F1LMI4;P36506;D4A1X1	Dual specificity mitogen-activated protein kinase kinase 2	Map2k2	6	21.2	44.38	9.77e-244
F1LMJ9;Q6TXE9		Eprs	64	43.9	169.86	0
F1LMN4;P12938	Cytochrome P450 2D3	Cyp2d3	4	12.1	57.028	6.75e-147
F1LMP2;P12346;P12346-2;Q4FZX7;F1MAG6	Serotransferrin	Tf	9	9.8	107.41	1.5e-25
F1LMV6		Dsp	52	18.7	332.39	9.51e-253
F1LMW6		Psmd14	5	24.8	32.924	6.46e-81
F1LMZ8;D3Z950		Psmd11	17	38.4	54.019	1.88e-145
F1LN66;D3ZEC3;P70712	Kynureninase	Kynu	2	5.8	52.45	2.41e-05
F1LNF0;F1LMN2		Myh14	88	47.4	228.91	0
F1LNF1;F1LM82;A7VJC2;A7VJC2-2;A7VJC2-4;A7VJC2-3;D4A1X0	Heterogeneous nuclear ribonucleoproteins A2/B1	Hnrnpa2b1	4	13.6	37.297	3.38e-15
F1LNW3;P97562	Acyl-coenzyme A oxidase;Peroxisomal acyl-coenzyme A oxidase 2	Acox2	32	53.5	76.746	0
F1LP08;Q5PQJ6	Pyrroline-5-carboxylate reductase 3	Pycrl	6	24.1	28.864	3.47e-44
F1LP72;Q68FR9-2;Q68FR9;G3V9D9;G3V732;F8WG86	Elongation factor 1-delta	Eef1d	9	16.9	72.269	6.68e-109
F1LP75;F1M7H9		Luc7l2	14	27.1	40.774	1.75e-232
F1LPA0		RGD1562301	5	25.7	38.822	4.2e-36
F1LPB3;D3ZW20;O88813	Long-chain-fatty-acid--CoA ligase 5	Acsl5	13	21.6	76.871	4.99e-138
F1LPF6;P11507;E9PSY3;D3ZJN5;E9PSX6;P11507-2;Q64578;P18596;D3ZBM5;D3ZHJ6;G3V9U7;P18596-2	Sarcoplasmic/endoplasmic reticulum calcium ATPase 2	Atp2a2	13	14.3	114.81	1.77e-168
F1LPK7;Q63598;D3ZRK9	Plastin-3	Pls3	11	22.5	70.998	4.43e-133
F1LPV0;F1LML0		Nars	7	20.6	64.198	2.45e-45
F1LPV8;F1M3K0		Suclg2	4	24	30.321	1.75e-85
F1LQ02;F1LMQ5;G3V9Y1;Q9JLT0	Myosin-10	Myh10	56	34.8	233.61	0
F1LQ81;Q9QUL6	Vesicle-fusing ATPase	Nsf	7	11.4	82.643	1.86e-53
F1LQ84;F1LQ23		Ugp2	12	26.6	56.838	6.22e-74
F1LQC0		Lars	10	11.6	134.41	2.79e-93
F1LQF5;Q3KR85		Ubac2	5	17.7	38.936	1.34e-11
F1LQK1;P05183;P04800;Q06884	Cytochrome P450 3A2;Cytochrome P450 3A1	Cyp3a2;Cyp3a1;Cyp3a73	5	11.3	57.795	4.3e-25
F1LQL3;P62718;F1M0K6	60S ribosomal protein L18a	Rpl18a;RGD1565566	11	39.8	22.319	4.45e-74
F1LQM9;D3ZBB4			6	6	124.03	4.64e-19
F1LQQ6		Pls1	6	11	70.389	3.76e-59
F1LQS3;P21533;D3ZTF3;F1M2R6;F1LVJ5;F1M2L7;F1M4J7	60S ribosomal protein L6	Rpl6	15	41.9	33.545	2.38e-218
F1LQW7;O08623;F8WFY8;O08623-2;O08623-3;F1LW97	Sequestosome-1	Sqstm1	2	6.6	47.651	0.00029467
F1LR41;G8JLS6;O08590	Amine oxidase;Membrane primary amine oxidase	G6pc;Aoc3	2	1.7	173	2.59e-08
F1LR47;P05178;D4A253;D4A820	Cytochrome P450 2C6	Cyp2c6v2;Cyp2c6	9	18.4	55.994	6.17e-52
F1LR89;O88656	Actin-related protein 2/3 complex subunit 1B	Arpc1b	8	21.5	41.477	2.35e-26
F1LRA1;Q62902	Protein ERGIC-53	Lman1	4	6.8	57.819	1.87e-08
F1LRA3;Q4V7C7;F1LRK8;F1LY09;D3ZHM0	Actin-related protein 3	Actr3	16	40.9	47.285	4.59e-113
F1LRD5;P41562	Isocitrate dehydrogenase [NADP];Isocitrate dehydrogenase [NADP] cytoplasmic	Idh1	28	61	47.462	3.61e-258
F1LRI5		Gcn1l1	22	11.9	293.17	3.09e-179
F1LRJ2		Srrm2	3	2	295.88	3.1e-12
F1LRL8		Arpc3	4	24.3	20.435	3.27e-13
F1LRR8;Q4V8K1;Q7TP88	Metalloreductase STEAP4	Steap4	5	15.5	52.674	1.17e-32
F1LRT9		Dync1h1	3	1	416.86	0
F1LS48;Q5XI22;D3ZKB6;F1LWW4	Acetyl-CoA acetyltransferase, cytosolic	Acat3;Acat2	9	20.8	69.82	4.58e-146
F1LS86		Iars	15	16.9	144.44	4.15e-180
F1LSB9;Q5XI07;F1LXI2;D4ADL3;D3ZBA0	Lipoma-preferred partner homolog	Lpp	7	15	68.389	4.18e-38
F1LSI8;P47819;G8JLQ5;P47819-2	Glial fibrillary acidic protein	Gfap	5	14.4	50.07	2.32e-44
F1LSQ6;P48004;P48004-2;D3ZPN4;F1M6I7	Proteasome subunit alpha type;Proteasome subunit alpha type-7	Psma7;LOC100363246	4	24.4	28.398	1.21e-12
F1LSR9;P06757	Alcohol dehydrogenase 1	Adh1	23	53.2	39.994	0
F1LT36;P63326;D3ZH53;D3ZJY5;D3ZEN7;F8WFG4;D4A3Z5;D3ZCN9;D4A3Z6;Q7TP86	40S ribosomal protein S10	Rps10;RGD1561871;LOC100360905;LOC100363439	4	19	19.634	4.67e-20
F1LT49		Lrrc47	4	9.6	63.629	1.87e-30
F1LUV9;P13596;F1LNY3;F1LTE5;F1MA96	Neural cell adhesion molecule 1	Ncam1	3	2.3	118.58	7.24e-07
F1LW74;D3ZCS4		LOC100360623	32	32.1	103.57	0
F1LX65;F1LXC8;F1LXC9			5	9.1	93.739	8.12e-192
F1LYK7		Cfl2	5	39.4	18.578	7.13e-170
F1LYQ5			10	23.8	61.437	7.41e-139
F1LZ34		Mat1a	3	10.8	23.534	0
F1LZW6;F1LX07		Slc25a13	19	33.3	74.382	1.66e-73
F1M127;F1M5T6;F1M124;F1LX32			7	7.8	130.51	2.09e-43
F1M1H0			4	18.2	34.054	1.57e-29
F1M1W1;O70490		Bucs1	8	44.6	29.745	3.05e-99
F1M3D3;F1LV13;Q62826;Q62826-2;F1LSJ5;Q9WV78	Heterogeneous nuclear ribonucleoprotein M	Hnrnpm	12	19.2	77.629	2.28e-37
F1M4S5;P83883;F1LWX1;F1M8T2;F8WFR5;D3ZDE0;D4A655	60S ribosomal protein L36a	RGD1563431;Rpl36a	8	30.2	12.278	2.56e-62
F1M510;P45592;F1M3P7	Cofilin-1	Cfl1	3	14.2	24.457	9e-188
F1M566;F1LTJ5			6	2	393.72	3.27e-27
F1M5L7			8	47.1	19.882	1.39e-104
F1M5X1;F1M853		Rrbp1	31	28.3	143.41	0
F1M5Z4;P25235;G8JLR0;D4A8V6	Dolichyl-diphosphooligosaccharide--protein glycosyltransferase subunit 2	Rpn2	7	17.7	71.783	2.48e-197
F1M775;D4A0X2;D4AE89		Diaph1	14	14	135.39	7.77e-150
F1M784;F1LXQ8		LOC100361758	13	23.8	74.673	1.25e-124
F1M7U1;Q6AYQ8	Acylpyruvase FAHD1, mitochondrial	Fahd1	2	10.8	24.581	8.32e-06
F1M953;P48721	Stress-70 protein, mitochondrial	Hspa9	16	28.9	73.744	4.17e-95
F1M9V7;D3Z8Z0		Npepps	9	13.8	103.34	2.57e-113
F1MA29;P63159;D4A9T3;D3ZCR3;D3ZXR5;D3ZA18;D3ZGW6;D4A2L7;D3ZLA7;D3ZL49;D3ZIU9;D3Z8A3;D3ZC69;F1LXZ8;F1M1H9;F1LNG6;D3ZYR6;D3ZLG3;D3ZJN6;D4A0N6;D3Z7Z9;F1M9J4;D3ZZD8;D4AEI9;F1LVZ2;D4A4X8;D3ZWY0;D3ZFH8;F1LTK2;D3ZXP6;F1LTL3;D3ZRY5;D4A5S3;F1M7I0;F1M8Z1;D3ZMK0;F1LYW8;F1M2Z0;F1M607;P52925;D3ZS25;D3ZHA8;D3ZDA5;F1LZ92;D4A160;D3ZEC1;F1M1H1;D4A6A9;F1M875;F1M4R2	High mobility group protein B1	LOC681718;Hmgb1;LOC679451;Hmgb1-ps3;Hmg1l1	11	40	24.908	9.56e-106
F1MA36;Q9QWN8	Spectrin beta chain, brain 2	Sptbn2	60	33.8	270.94	0
F1MA38;P35565	Calnexin	Canx	5	10.5	67.414	5.2e-12
F1MA64;D4A5G0;D3ZR20		Rbm39	14	24.5	59.406	2.14e-107
F1MAC0;E9PU10		Ifi47	8	26.2	47.432	5.15e-66
F1MAE2		Akr1c13	5	30.5	37.257	0
F1MAK5		Ddi2	15	39.1	44.65	1.5e-95
F1MAL3;F1LSL8		Sptb	104	52.2	267.95	0
F1MAM3;D3ZBT0;D3ZN26;D4A4E2			2	7.4	56.871	0.00033887
F1MAR0		Parp9	18	32.5	92.214	2.05e-298
F2Z3Q8;P52296	Importin subunit beta-1	Kpnb1	10	14.2	97.183	1.26e-85
F2Z3R6;F1LMY2;F1LN75;Q9QZR6	Septin-9	2005-08-31	3	7.8	64.866	1.09e-05
F2Z3T9		LOC690372	3	4.2	53.516	2.77e-09
F8WFI9;Q4G061	Eukaryotic translation initiation factor 3 subunit B	Eif3b	8	12.3	107.98	7.06e-143
F8WFR8;P51583	Multifunctional protein ADE2;Phosphoribosylaminoimidazole-succinocarboxamide synthase;Phosphoribosylaminoimidazole carboxylase	LOC100359876;Paics	4	12.9	47.122	8.09e-27
F8WFT7;P23562;Q5U329;P23562-2	Band 3 anion transport protein	Slc4a1	6	8.6	103.24	1.13e-38
F8WFW0;F1LWC2;P23358;D3ZJE2;F1M4N3;D4A8N3;F1LY34	60S ribosomal protein L12	Rpl12;Rpl12-ps1;LOC499782;RGD1563956	6	38.2	20.91	2.71e-116
F8WFW6;P62250	40S ribosomal protein S16	Rps16	15	55.2	19.156	3.4e-95
F8WG47;O35987;D4A5F9	NSFL1 cofactor p47	Nsfl1c	2	8.3	40.923	1.84e-05
F8WG89;P04550	Parathymosin	Ptms	2	16.5	15.405	3.14e-10
G3V6B0;F1M024;F1M5Z2;F1LTX6		Pdxdc1	11	18.7	86.97	1.39e-124
G3V6C2		Hgd	12	42.2	49.889	4.3e-152
G3V6C4;O70199	UDP-glucose 6-dehydrogenase	Ugdh	24	54.2	54.886	0
G3V6D3;P10719	ATP synthase subunit beta;ATP synthase subunit beta, mitochondrial	Atp5b	22	58	56.344	0
G3V6I4		rCG_20363	4	15.6	37.79	1.82e-81
G3V6I9;D4A1Z2;P12749;D4AE42;D3ZSF2;D3ZDV4	60S ribosomal protein L26	Rpl26;Rpl26-ps2;Rpl26-ps1	16	57.9	17.258	3.25e-108
G3V6J0;Q9JLJ3	4-trimethylaminobutyraldehyde dehydrogenase	Aldh9a1	25	43.4	56.468	0
G3V6P7;D4A1H1;D4A8U6		Myh9	22	7.8	226.41	0
G3V6S0;F1LRX5		Sptbn1	3	2.1	274.06	0
G3V6S5;P27653;F1LW12;D3ZZM8	C-1-tetrahydrofolate synthase, cytoplasmic;Methylenetetrahydrofolate dehydrogenase;Methenyltetrahydrofolate cyclohydrolase;Formyltetrahydrofolate synthetase	Mthfd1	55	59.5	100.96	0
G3V6S8		LOC362264	6	17.1	39.025	1.55e-29
G3V6T1;D3ZFS9		Copa	37	34.5	138.36	0
G3V6T7;P38659	Protein disulfide-isomerase A4	Pdia4	8	15.6	72.747	4.26e-32
G3V6W6		LOC100365869	22	64.5	45.796	6.41e-225
G3V6X4;F1LQ82;Q62940;D4A0U5	E3 ubiquitin-protein ligase NEDD4	Nedd4	11	16.9	102.75	1.29e-109
G3V709;Q6XQN1	Nicotinate phosphoribosyltransferase	Naprt1	8	17.5	58.603	2.9e-49
G3V713;Q4KM49	Tyrosine--tRNA ligase, cytoplasmic	Yars	8	20	63.025	2.61e-98
G3V734;Q64591	2,4-dienoyl-CoA reductase, mitochondrial	Decr1	4	17.9	36.132	2.58e-13
G3V743;O88941	Mannosyl-oligosaccharide glucosidase	Mogs	6	8.9	91.961	3.93e-48
G3V798;F1LSN0		Srsf4	4	12.1	55.674	9.63e-21
G3V7A8;D4A8U7;P28023	Dynactin subunit 1	Dctn1	13	13.3	141.94	3.74e-119
G3V7C6;Q6P9T8	Tubulin beta-4B chain	Tubb4b	7	17.3	49.83	0
G3V7G8;Q5I0G4	Glycine--tRNA ligase	Gars	6	11.5	81.792	2.93e-71
G3V7G9		Eif3s6ip	15	33.2	66.71	1.99e-169
G3V7J0;Q02253	Methylmalonate-semialdehyde dehydrogenase [acylating], mitochondrial	Aldh6a1	23	47.5	57.747	2.08e-302
G3V7L6;Q63347	26S protease regulatory subunit 7	Psmc2	22	59.1	48.633	2.4e-205
G3V7N8;P97840;P97840-2;Q6P7Q6;D3Z839	Galectin-9	Lgals9	4	11.6	39.969	1.58e-73
G3V7Q7;D3ZWX0		Iqgap1	50	34.2	188.83	0
G3V7T5;Q3MIF4	Xylulose kinase	Xylb	12	26.5	59.579	4.77e-158
G3V7W2;P04937;P04937-3;D4AEE1;P04937-2;F1LST1;P04937-4	Fibronectin;Anastellin	Fn1	19	10.7	272.44	1.1e-163
G3V7Y3;P35434	ATP synthase subunit delta, mitochondrial	Atp5d	2	13.7	17.563	6.65e-15
G3V817		Xrcc5	4	6.7	83.091	1.45e-14
G3V822;P16303	Carboxylesterase 3	Ces1d;Ces3	2	4.1	62.149	5.2e-06
G3V826;P50137	Transketolase	Tkt	20	35.1	71.158	5.75e-92
G3V836;P05371;F1LSV6;E9PTR1	Clusterin;Clusterin;Clusterin beta chain;Clusterin alpha chain	Clu	5	15.9	51.42	4.59e-41
G3V852;D4A0S8;F1M4K5		Tln1	78	37.2	269.67	0
G3V888;F1LQS4;P16638;G3V9G4;P16638-2	ATP-citrate synthase	Acly	49	49	120.78	0
G3V8A5		Vps35	13	20.4	91.726	2.92e-293
G3V8D5;P85971	6-phosphogluconolactonase	Pgls	9	38.5	30.821	7.69e-60
G3V8G2;D4A8S4		Psmd5	10	24.6	55.852	8.04e-81
G3V8I6;F1LR10;Q4KM31		Lima1	24	39.5	83.796	5.35e-202
G3V8L3;P48679;E9PSR1;D4A4U0;G3V8M3	Prelamin-A/C;Lamin-A/C	Lmna	10	17.7	74.311	1.16e-41
G3V900;F1LP06;P05065	Fructose-bisphosphate aldolase;Fructose-bisphosphate aldolase A	Aldoa;Aldoal1	4	10.8	45.086	1.95e-14
G3V918		Gart	8	12.2	107.58	5.4e-56
G3V928		Lrp1	27	7.9	504.88	1.36e-141
G3V940;O89046	Coronin-1B	Coro1b	6	14.9	53.938	1.16e-105
G3V9A2;B2GV99;D3ZCQ5;Q64119;D4A2L0	Myosin light polypeptide 6	Myl6b;Myl6	12	87.4	16.961	0
G3V9B9;P21775;F1LPD6;P07871;D4AB84;P21775-2;D4AE53;D3ZHR3	3-ketoacyl-CoA thiolase A, peroxisomal;3-ketoacyl-CoA thiolase B, peroxisomal	Acaa1a;Acaa1b	18	43.1	44.825	0
G3V9E3;Q62736;F1LQD6;REV__D3ZXH0;REV__D3ZRB1;REV__D3ZZ81;REV__F1M8A4	Non-muscle caldesmon	Cald1	18	30.7	60.611	3.78e-103
G3V9G2;Q9JJ54;G3V6A4;Q9JJ54-3;G3V6A5;Q9JJ54-2;Q9JJ54-4;P17132	Heterogeneous nuclear ribonucleoprotein D0;Heterogeneous nuclear ribonucleoprotein C	Hnrpd;Hnrnpd;Hnrnpc	5	14.4	38.218	1.27e-19
G3V9J1;P14046;F1M4L8;P06238	Alpha-1-inhibitor 3	LOC297568;A1i3;Cpamd8	3	2.7	163.72	1.86e-29
G3V9L3		Dusp3	3	20.9	23.115	5.47e-47
G3V9R0;F1LNK3;F1LNB8;D3ZFH3		Luc7l	12	41.5	38.481	1e-135
G3V9R4;O35826	Bifunctional UDP-N-acetylglucosamine 2-epimerase/N-acetylmannosamine kinase;UDP-N-acetylglucosamine 2-epimerase;N-acetylmannosamine kinase	Gne	24	35.5	82.911	0
G3V9U2;F1LWF9;P13437	3-ketoacyl-CoA thiolase, mitochondrial	Acaa2	29	73.8	41.885	0
G3V9V3;Q62871;Q62871-2;Q6AZ35;D3ZU74;Q62871-3;G3V792;Q63100;Q63100-3;D4A9K8;Q63100-4	Cytoplasmic dynein 1 intermediate chain 2	Dync1i2	5	12.1	71.338	4.06e-68
G3V9Y7;Q5BK32	FAS-associated factor 2	Faf2	9	28.1	52.46	8.91e-39
G3V9Z4;Q5I0J9	Putative L-aspartate dehydrogenase	Aspdh	11	50.9	30.388	2.51e-121
O08557;F1LNX0	N(G),N(G)-dimethylarginine dimethylaminohydrolase 1	Ddah1	5	27	31.426	4.38e-19
O08629;F1M1W6	Transcription intermediary factor 1-beta	Trim28	11	17	88.955	1.3e-158
O09171	Betaine--homocysteine S-methyltransferase 1	Bhmt	25	64.4	44.976	0
O35077;F1M3R0	Glycerol-3-phosphate dehydrogenase [NAD(+)], cytoplasmic	Gpd1	17	46.7	37.452	0
O35142	Coatomer subunit beta	Copb2	24	34.5	102.55	0
O35244;F8WG72	Peroxiredoxin-6	Prdx6	10	61.2	24.818	4.05e-137
O35509;P62494;F1M0S1	Ras-related protein Rab-11B;Ras-related protein Rab-11A	Rab11b;Rab11a	6	28	24.488	7.17e-18
O35547	Long-chain-fatty-acid--CoA ligase 4	Acsl4	2	4.6	74.326	5.61e-13
O35824;Q5M9H7	DnaJ homolog subfamily A member 2	Dnaja2	5	11.7	45.765	5.05e-19
O35952;F1LQI1;O35952-2	Hydroxyacylglutathione hydrolase, mitochondrial	Hagh	3	17.2	34.109	1.53e-32
O55096;F1M7X8	Dipeptidyl peptidase 3	Dpp3;Dpp3l	7	13.1	83.038	3.54e-128
O70351;F1LNT4	3-hydroxyacyl-CoA dehydrogenase type-2	Hsd17b10	11	48.3	27.245	3.21e-153
O88202	60 kDa lysophospholipase;L-asparaginase;Platelet-activating factor acetylhydrolase	Aspg	9	25.9	60.794	1.28e-115
O88321;D4A9C9		Psmd4	9	30.5	41.073	3.57e-119
O88618	Formimidoyltransferase-cyclodeaminase;Glutamate formimidoyltransferase;Formimidoyltetrahydrofolate cyclodeaminase	Ftcd	20	39.9	58.913	5.89e-231
O88767;Q5BKC3	Protein DJ-1	Park7	7	37.6	19.974	8.06e-19
O88989	Malate dehydrogenase, cytoplasmic	Mdh1	9	32.6	36.483	3.13e-53
O88994;D3ZFV5;D3Z900	MOSC domain-containing protein 2, mitochondrial	1998-02-28	5	14.2	38.248	5.74e-14
O89035		Slc25a10	5	17.8	31.454	4.65e-10
P00173;D4A1G4;P00173-2	Cytochrome b5	Cyb5a	10	56.7	15.355	3.07e-135
P00481;F1MAE6	Ornithine carbamoyltransferase, mitochondrial	Otc	9	27.1	39.886	1.63e-19
P00502;Q6TUG1;D3ZD94	Glutathione S-transferase alpha-1	Gsta1	2	7.7	25.607	6.12e-68
P00507;F1LXI9	Aspartate aminotransferase, mitochondrial	Got2	6	19.8	47.314	3.83e-18
P00786	Pro-cathepsin H;Cathepsin H mini chain;Cathepsin H;Cathepsin H heavy chain;Cathepsin H light chain	Ctsh	4	11.7	37.104	1.47e-15
P00884;Q66HT1	Fructose-bisphosphate aldolase B;Fructose-bisphosphate aldolase	Aldob	25	54.9	39.618	2.23e-260
P01026	Complement C3;Complement C3 beta chain;Complement C3 alpha chain;Neutrophil chemotactic factor-2;C3a anaphylatoxin;Complement C3b alpha chain;Complement C3c alpha chain fragment 1;Complement C3dg fragment;Complement C3g fragment;Complement C3d fragment;Complement C3f fragment;Complement C3c alpha chain fragment 2	C3	23	17.7	186.46	2.66e-255
P01946;G3V8R3	Hemoglobin subunit alpha-1/2	Hba1	9	66.9	15.328	3.42e-277
P02091;CON__Q3SX09;O88752;CON__P02070	Hemoglobin subunit beta-1	Hbb	6	33.3	15.979	0
P02262;P0CC09;D4ACV3	Histone H2A type 1;Histone H2A type 2-A;Histone H2A	Hist2h2aa3;Hist2h2ac	2	13.8	14.077	1.57e-108
P02600;P02600-2;P17209	Myosin light chain 1/3, skeletal muscle isoform	Myl1	2	11.6	20.679	2.32e-150
P02650	Apolipoprotein E	Apoe	8	30.4	35.753	8.47e-30
P02680;P02680-2	Fibrinogen gamma chain	Fgg	6	19.8	50.632	2.29e-98
P02692	Fatty acid-binding protein, liver	Fabp1	11	66.1	14.272	6.57e-155
P02706;D3ZMH8	Asialoglycoprotein receptor 1	Asgr1	11	35.6	32.849	6.48e-56
P02770	Serum albumin	Alb	18	31.1	68.73	5.12e-72
P04041	Glutathione peroxidase 1	Gpx1	15	62.7	22.323	1.06e-181
P04642;F1M7I5;F1M2L5;D4AD97;P19629;Q6AYX2;D3ZM24;F1M1K4	L-lactate dehydrogenase A chain;L-lactate dehydrogenase	Ldha	22	63	36.45	0
P04762;D3ZYF1;Q499V8	Catalase	Cat	33	64.9	59.756	0
P04764;D3ZJT8;F1M8W1;F1M6P0;D3ZKP2;P15429;F1LTP6;D3ZYU0;F1M2K7;F1M383;P07323;D4A0Q2;F1M9V3;G8JLQ8;F1M5J0	Alpha-enolase	Eno1	18	50.7	47.127	2.49e-162
P04785	Protein disulfide-isomerase	P4hb	28	51.5	56.951	2.64e-129
P04797;D3ZGY4;E9PTN6;F8WFP3;F1M2U5;D3ZKR3;F1M0Y3;F1M9J7;F1LW99;F1LTU2;F1LUR7;D3ZWV2;F1M359;D3ZDS1;F1LZV7;F1LU03;D3ZQC7;D3ZWP0;F1LY57;D4A3W5;D3ZIY0;F1LUI2;F1LUV3;D4A7F9;F1LZ22;D3Z8U8;F1M9J9;F1M9K7;B1WBQ8;Q9ESV6;D3ZQT0;D4A6J7;D3ZEN2;F1M5I8;F1M4G6;F1M2N4;F1M261;F1M0P5;F1LW42;F1LTV2;F1LW78;D3ZPI7;D4AB12;D3ZXS2;D3ZME3;D3ZW22;D3Z8G2;F1M269;F1MA05;F1LT88;F1M045;E9PTV9;F1M5K4;D3Z7Z7;F1LVS0;D3ZHE9;F1M3A3;…	Glyceraldehyde-3-phosphate dehydrogenase	Gapdh;RGD1560797;RGD1564688	13	43.5	35.828	0
P04897;Q5EEY3;Q63803;D3ZPZ2;P63095;G3V8E8;P38406;D4AA42;P08753;P10824;P29348;P59215;P59215-2;P63095-3	Guanine nucleotide-binding protein G(i) subunit alpha-2	Gnai2	2	9.6	40.499	2.52e-19
P04904;P46418;Q6AXY0	Glutathione S-transferase alpha-3	Gsta3	10	39.8	25.319	6.3e-74
P05179;D3Z7Y1	Cytochrome P450 2C7	Cyp2c7;LOC100361347	21	38.2	56.186	0
P05182;F1LPJ4;D3ZJL9	Cytochrome P450 2E1	Cyp2e1	9	19.5	56.626	2.81e-30
P05197;F1LM66	Elongation factor 2	Eef2	55	53.1	95.283	0
P05369;F1LND7;D3ZJW2	Farnesyl pyrophosphate synthase	Fdps	11	29.2	40.829	1.1e-120
P06536;G3V7U9;E9PT44;P06536-2	Glucocorticoid receptor	Nr3c1	3	5.9	87.555	5.13e-11
P06685;F1M9H2;D3ZE88;D3ZSA3;P06686;P06687;F1LRK1;G3V8S4;P54708;F1LMF3;Q64541;P54708-2;F1LUN7	Sodium/potassium-transporting ATPase subunit alpha-1	Atp1a1	5	6.1	113.05	2.45e-18
P06761	78 kDa glucose-regulated protein	Hspa5	42	60.4	72.346	0
P06866-2;P06866	Haptoglobin;Haptoglobin alpha chain;Haptoglobin beta chain	Hp	4	12.1	42.474	1.44e-08
P07153	Dolichyl-diphosphooligosaccharide--protein glycosyltransferase subunit 1	Rpn1	20	42.5	68.303	1.65e-207
P07379;F1LQJ7	Phosphoenolpyruvate carboxykinase, cytosolic [GTP]	Pck1	27	51.8	69.415	3.94e-284
P07687;F1LTS8;F8WG46	Epoxide hydrolase 1	Ephx1	7	19.1	52.581	2.6e-27
P07756;F1M9N2	Carbamoyl-phosphate synthase [ammonia], mitochondrial	Cps1	22	14.9	164.58	0
P07824	Arginase-1	Arg1	18	67.2	34.973	3.35e-155
P07872-2;P07872;F1M609;F1LQC1	Peroxisomal acyl-coenzyme A oxidase 1;Peroxisomal acyl-CoA oxidase 1, A chain;Peroxisomal acyl-CoA oxidase 1, B chain;Peroxisomal acyl-CoA oxidase 1, C chain;Acyl-coenzyme A oxidase	Acox1	24	45.2	74.69	0
P07896	Peroxisomal bifunctional enzyme;Enoyl-CoA hydratase/3,2-trans-enoyl-CoA isomerase;3-hydroxyacyl-CoA dehydrogenase	Ehhadh	49	60.5	78.657	0
P07953;P07953-2;F1LQX5;P25114;F1M7B7	6-phosphofructo-2-kinase/fructose-2,6-bisphosphatase 1;6-phosphofructo-2-kinase;Fructose-2,6-bisphosphatase	Pfkfb1	14	32.9	54.763	6.75e-132
P08010;D4AB97;F1LXL7;D4AB87	Glutathione S-transferase Mu 2	Gstm2	13	48.6	25.702	1.4e-178
P08011	Microsomal glutathione S-transferase 1	Mgst1	6	36.8	17.471	5.57e-32
P08033	Gap junction beta-1 protein	Gjb1	4	13.4	32.003	4.83e-21
P08081;D3ZPJ7;P08081-2	Clathrin light chain A	Clta	8	29	26.98	4.79e-69
P08503;G3V796	Medium-chain specific acyl-CoA dehydrogenase, mitochondrial	Acadm	14	41.1	46.555	1.34e-135
P08541;D3ZLR6;F1LLV5;Q62789;G3V688	UDP-glucuronosyltransferase 2B2	Ugt2b	4	7	60.985	1.28e-30
P08644;P08644-2;Q04970;F8WG81;F1LPX3;P20171	GTPase KRas;GTPase KRas, N-terminally processed;GTPase NRas;GTPase HRas;GTPase HRas, N-terminally processed	Kras;Nras;Hras1	4	30.7	21.656	1.44e-19
P08649;F1LNM4	Complement C4;Complement C4 beta chain;Complement C4 alpha chain;C4a anaphylatoxin;Complement C4 gamma chain	C4;C4-2	5	4.7	192.16	7.1e-188
P08683;P11510;E9PTW8;F1LSA2;P04167-2;B2GV28;P00176;P04167	Cytochrome P450 2C11	Cyp2c11	14	31.6	57.18	4.97e-85
P09006	Serine protease inhibitor A3N	Serpina3n	10	24.9	46.651	3.54e-163
P09034	Argininosuccinate synthase	Ass1	48	77.9	46.496	0
P09118;F1LZ17	Uricase	Uox	3	14.5	34.934	7.61e-27
P09139;P09139-2	Serine--pyruvate aminotransferase, mitochondrial	Agxt	13	31.9	45.834	9.37e-74
P09367;F1LMK6;P09367-2	L-serine dehydratase/L-threonine deaminase	Sds	8	26.7	38.432	2.21e-63
P09495	Tropomyosin alpha-4 chain	Tpm4	26	63.7	28.509	0
P09606	Glutamine synthetase	Glul	14	35.9	42.267	8.27e-282
P09811;G3V8V3;B2GV03;G3V6Y6;P53534;P09812	Glycogen phosphorylase, liver form	Pygl	61	54.5	97.482	0
P0C2X9;F1LQ99;F8WFI0	Delta-1-pyrroline-5-carboxylate dehydrogenase, mitochondrial	Aldh4a1	12	21.8	61.868	1.02e-58
P10111;F1LU07;F1M4T9	Peptidyl-prolyl cis-trans isomerase A;Peptidyl-prolyl cis-trans isomerase	Ppia	6	36	17.874	5.51e-54
P10634	Cytochrome P450 2D26	Cyp2d26	11	28.4	56.683	3.2e-206
P10760;D4AB27;D3ZQH8	Adenosylhomocysteinase	Ahcy	24	44.4	47.538	1.24e-233
P10860	Glutamate dehydrogenase 1, mitochondrial	Glud1	28	42.3	61.415	0
P10867;F1LR61;F1M5I9;F1LZB1	L-gulonolactone oxidase	Gulo	4	8	50.615	6.97e-10
P10888	Cytochrome c oxidase subunit 4 isoform 1, mitochondrial	Cox4i1	3	16.6	19.514	1.16e-06
P11030;F1LV02	Acyl-CoA-binding protein;Triakontatetraneuropeptide;Octadecaneuropeptide	Dbi	2	36.8	10.027	4.79e-07
P11232	Thioredoxin	Txn	4	25.7	11.673	1.59e-13
P11240	Cytochrome c oxidase subunit 5A, mitochondrial	Cox5a	3	21.9	16.129	1.72e-06
P11348	Dihydropteridine reductase	Qdpr	9	45.2	25.552	6.59e-56
P11497;P11497-2;F1LP35;D3ZRA3	Acetyl-CoA carboxylase 1;Biotin carboxylase	Acaca	35	21.8	265.19	0
P11517	Hemoglobin subunit beta-2		4	32	15.982	0
P11598	Protein disulfide-isomerase A3	Pdia3	25	51.1	56.623	1.37e-155
P11711	Cytochrome P450 2A1	Cyp2a1	2	4.3	55.994	8.77e-42
P11915;F1LQ55;P11915-2;Q6QI48	Non-specific lipid-transfer protein	Scp2	25	44.8	58.813	8.21e-285
P11951;F1M733;P11950	Cytochrome c oxidase subunit 6C-2	Cox6c2	4	46.1	8.4548	1.95e-13
P12001;D4AD69;D3ZWH7	60S ribosomal protein L18	Rpl18	13	50.5	21.658	4.31e-110
P12075	Cytochrome c oxidase subunit 5B, mitochondrial	Cox5b	3	20.9	13.915	8.52e-07
P12785	Fatty acid synthase;[Acyl-carrier-protein] S-acetyltransferase;[Acyl-carrier-protein] S-malonyltransferase;3-oxoacyl-[acyl-carrier-protein] synthase;3-oxoacyl-[acyl-carrier-protein] reductase;3-hydroxypalmitoyl-[acyl-carrier-protein] dehydratase;Enoyl-[acyl-carrier-protein] reductase;Oleoyl-[acyl-carrier-protein] hydrolase	Fasn	88	42	272.65	0
P12928-2;P12928;D3ZH85;F1LTA5	Pyruvate kinase isozymes R/L	Pklr	31	68.9	58.793	0
P12939;Q5I0P9	Cytochrome P450 2D10	Cyp2d10;Cyp2d5	2	5.8	57.076	5.12e-227
P13086	Succinyl-CoA ligase [ADP/GDP-forming] subunit alpha, mitochondrial	Suclg1	11	26	36.148	1.7e-106
P13107;F1LME8;G3V9D2	Cytochrome P450 2B3	Cyp2b3	4	7.7	56.384	2.39e-11
P13255	Glycine N-methyltransferase	Gnmt	8	33.1	32.549	1.23e-94
P13444	S-adenosylmethionine synthase isoform type-1	Mat1a	11	18.9	43.697	0
P13471;Q6PDV6;D4A290;F1MA00	40S ribosomal protein S14	Rps14	9	41.7	16.259	3.02e-177
P13803;REV__Q9Z2Y1;REV__E9PTS7;REV__E9PU68;REV__F1MAI7	Electron transfer flavoprotein subunit alpha, mitochondrial	Etfa	10	32.7	34.951	1.34e-36
P13832	Myosin regulatory light chain RLC-A	Rlc-a	2	16.3	19.895	0
P14056;F1M9C3	Serine/threonine-protein kinase A-Raf	Araf	6	19.4	67.551	7.7e-38
P14141	Carbonic anhydrase 3	Ca3	15	74.2	29.431	0
P14408;Q5M964;P14408-2	Fumarate hydratase, mitochondrial	Fh	18	52.7	54.463	0
P14480-2;D3Z8Y5;P14480;CON__P02676	Fibrinogen beta chain;Fibrinopeptide B;Fibrinogen beta chain	Fgb	5	10.3	56.612	2.92e-40
P14604	Enoyl-CoA hydratase, mitochondrial	Echs1	4	19.3	31.516	6.19e-17
P14669;F1LSV5;F1M3H7;F1M0L7;Q6TXF2	Annexin A3;Annexin	Anxa3	4	13.9	36.363	4.32e-08
P14942;F1LVC6;D3ZBD6	Glutathione S-transferase alpha-4;Glutathione S-transferase	Gsta4;LOC100365881	3	13.1	25.51	2.48e-11
P15083;F1M7H2	Polymeric immunoglobulin receptor;Secretory component	Pigr	2	2.5	84.797	2.21e-50
P15178	Aspartate--tRNA ligase, cytoplasmic	Dars	19	46.7	57.126	1.69e-141
P15650	Long-chain specific acyl-CoA dehydrogenase, mitochondrial	Acadl	9	23.3	47.872	7.44e-38
P15709;D3ZR55	Bile salt sulfotransferase	St2a1	2	9.2	33.19	1.57e-193
P15865;D4A3K5	Histone H1.2	Hist1h1c	5	20.1	21.987	4.51e-37
P15999;F1LP05	ATP synthase subunit alpha, mitochondrial;ATP synthase subunit alpha	Atp5a1	42	60.4	59.753	0
P16617;Q5XIV1;D4A9Z5	Phosphoglycerate kinase 1	Pgk1	26	61.2	44.538	0
P16970;F1LR38	ATP-binding cassette sub-family D member 3	Abcd3	38	47.5	75.315	0
P17074;D4A6G6;D3ZSH6;F1LYF3;F1M764;F1M8C7;D3ZUD7;D3ZGN8;F1M395;F1M9M2;D4A8B9;F1LYT7;F1LUH5	40S ribosomal protein S19	Rps19;LOC100362339;LOC100360843;RGD1562153;LOC687298	18	75.2	16.085	5.44e-93
P17077;D3ZMB8;F1M7A9;F1LX84;D4ABC9;F1M2X8;D3ZZQ7;F1M309	60S ribosomal protein L9	Rpl9;RGD1561789;RGD1561928	10	48.4	21.893	8.43e-91
P17078;D3ZN79;D3ZB50;F1M6G3;D3Z942;D3ZEF3	60S ribosomal protein L35	Rpl35;LOC686074	7	42.3	14.552	1.63e-116
P17625;D3ZDS5;D4A5K9	Glycogen [starch] synthase, liver	Gys2	6	10.2	80.733	9.72e-86
P17712;P17712-3;P17712-2;Q64596	Glucokinase	Gck	8	21.7	52.116	1.36e-131
P17764	Acetyl-CoA acetyltransferase, mitochondrial	Acat1	9	27.6	44.695	1.46e-88
P17988	Sulfotransferase 1A1	Sult1a1	14	52.6	33.906	4.41e-201
P18163	Long-chain-fatty-acid--CoA ligase 1	Acsl1	26	36.1	78.178	0
P18297;D3ZT59	Sepiapterin reductase	Spr	4	18.7	28.128	1.65e-13
P18418	Calreticulin	Calr	11	26	47.995	5.84e-85
P18420	Proteasome subunit alpha type-1	Psma1	3	16.3	29.517	5.88e-17
P19112;F1LRT1;Q9Z1N1	Fructose-1,6-bisphosphatase 1	Fbp1	26	68.6	39.609	0
P19225	Cytochrome P450 2C70	Cyp2c70	4	10	56.156	7.43e-34
P19468	Glutamate--cysteine ligase catalytic subunit	Gclc	11	30	72.618	1.18e-197
P19511	ATP synthase subunit b, mitochondrial	Atp5f1	3	12.9	28.868	1.93e-85
P19804;Q05982;D3ZGV9	Nucleoside diphosphate kinase B;Nucleoside diphosphate kinase A	Nme2;Nme1	5	50.7	17.283	2.69e-35
P19945;D3ZJT4;F1M2B8;D3ZAV9	60S acidic ribosomal protein P0	Rplp0	14	47.3	34.215	7.01e-201
P20059	Hemopexin	Hpx	7	14.3	51.35	9.16e-20
P20070-2;P20070;P20070-3	NADH-cytochrome b5 reductase 3;NADH-cytochrome b5 reductase 3 membrane-bound form;NADH-cytochrome b5 reductase 3 soluble form	Cyb5r3	6	27	34.865	1.62e-38
P20673;Q4QRB8	Argininosuccinate lyase	Asl	24	47.7	51.549	2.05e-284
P20814;D3Z8S1	Cytochrome P450 2C13, male-specific	Cyp2c13;LOC100361492	3	8.2	55.859	4.76e-17
P20816	Cytochrome P450 4A2	Cyp4a2	4	11.3	57.968	1.78e-52
P21531;D3ZXU8;D4A9G1	60S ribosomal protein L3	Rpl3	27	53.8	46.135	4.81e-215
P21643	Tryptophan 2,3-dioxygenase	Tdo2	7	20.4	47.856	2.87e-45
P22734;P22734-2	Catechol O-methyltransferase	Comt	13	34.1	29.597	1.77e-106
P22791;F1M9Q5;P17425	Hydroxymethylglutaryl-CoA synthase, mitochondrial	Hmgcs2	21	38.6	56.911	0
P23457;P51652;G3V895;Q6AYQ2;D3ZEL2;F1LU12;F1M6N4;D3ZRB7	3-alpha-hydroxysteroid dehydrogenase	Akr1c9	24	61.8	37.027	0
P23514	Coatomer subunit beta	Copb1	18	25.8	107.01	0
P23965;Q68G41	Enoyl-CoA delta isomerase 1, mitochondrial	Eci1	3	15.2	32.254	4.78e-14
P24008;G8JLS2;P24008-2;F1M6Y1	3-oxo-5-alpha-steroid 4-dehydrogenase 1	Srd5a1	3	9.7	29.78	7.92e-07
P24329	Thiosulfate sulfurtransferase	Tst	6	22.6	33.406	1.62e-35
P24470;Q68G40	Cytochrome P450 2C23	Cyp2c23	11	22.9	56.432	6.45e-45
P24473	Glutathione S-transferase kappa 1	Gstk1	4	28.8	25.493	9.41e-48
P25093;F1M6W1;D4AEK8	Fumarylacetoacetase	Fah	10	33.9	45.975	8.32e-111
P25113;P16290;F1M1Y1	Phosphoglycerate mutase 1;Phosphoglycerate mutase 2	Pgam1;Pgam2	9	40.6	28.832	7.91e-24
P25409	Alanine aminotransferase 1	Gpt	4	7.5	55.109	6.73e-11
P25886;F1LYI5;D4A3G6;D3ZWV1;D4A883;D3Z8Q4;D3ZKM8;D4A7X3;F1LX53;D3ZIV1;D4AEL5;F1LW15;D3ZDV6;F1LVH1;F1M2K5;F1M3I7;F1M346;D3Z7Z0;F1LWX2;F1M4V2;F1LZU8;F1M4N2;D4A888;D4A1N7	60S ribosomal protein L29	Rpl29;RGD1564138	7	32.7	17.325	5.29e-17
P26772;F1LZ82	10 kDa heat shock protein, mitochondrial	Hspe1	2	20.6	10.902	0.0001485
P27364;F1LNS3;P22072;P22071;Q62878	3 beta-hydroxysteroid dehydrogenase type 5;3 beta-hydroxysteroid dehydrogenase/Delta 5-->4-isomerase type 2;3-beta-hydroxy-Delta(5)-steroid dehydrogenase;Steroid Delta-isomerase	Hsd3b5;Hsd3b	3	9.4	42.206	7.7e-63
P27867;Q6TUH3	Sorbitol dehydrogenase	Sord	16	35	38.234	7.65e-108
P27952;G3V957;E9PU05;E9PTY3;D3ZQW7;D3ZIY7;F1LUI9;F1LZV8;D4A577;E9PT76;E9PSQ6;D3ZT78;D3ZQ72;D3ZHD8;F1M5X9;D3ZW37;D3ZAS1;F1LVB4;D3ZP90;F1LUE4;F1M474;E9PTW0	40S ribosomal protein S2	Rps2;LOC100359960;LOC688473;RGD1560789	10	32.8	31.231	3.71e-38
P28037	Cytosolic 10-formyltetrahydrofolate dehydrogenase	Aldh1l1	44	50.9	98.873	0
P28480;F1LUR8	T-complex protein 1 subunit alpha	Tcp1	18	39.7	60.359	1.21e-106
P29147	D-beta-hydroxybutyrate dehydrogenase, mitochondrial	Bdh1	8	22.4	38.201	1.8e-26
P29314;D3ZV50;D3ZF87;F1LY44;D3ZGL8;D3ZTT5	40S ribosomal protein S9	Rps9;RGD1566136;LOC100364509	19	58.8	22.591	2.83e-73
P29410;P29410-2	Adenylate kinase 2, mitochondrial	Ak2	3	15.5	26.379	1.79e-05
P29419	ATP synthase subunit e, mitochondrial	Atp5i	3	42.3	8.2545	1.36e-07
P29457;Q5RJR9	Serpin H1	Serpinh1	6	22.8	46.517	2.8e-38
P30713	Glutathione S-transferase theta-2	Gstt2	10	43	27.439	3.23e-58
P31000;G3V8C3;F1M7P4;P21807;P12839;G3V7S2;G3V8Q2;P23565;P19527	Vimentin	Vim	50	80.5	53.732	0
P31044	Phosphatidylethanolamine-binding protein 1;Hippocampal cholinergic neurostimulating peptide	Pebp1	7	57.8	20.801	8.73e-75
P31210;F1LML3	3-oxo-5-beta-steroid 4-dehydrogenase	Akr1d1	25	81	37.377	0
P31399;D3ZWT8	ATP synthase subunit d, mitochondrial	Atp5h	3	25.5	18.763	1.03e-17
P32089;F1M1U5	Tricarboxylate transport protein, mitochondrial	Slc25a1	9	26	33.835	1.37e-23
P32232;F1LME2;P32232-2;D3ZPH9;P32232-3;D3ZSC5	Cystathionine beta-synthase	Cbs	4	8.7	61.454	1.29e-14
P32551	Cytochrome b-c1 complex subunit 2, mitochondrial	Uqcrc2	5	13.1	48.396	4.06e-13
P32755;F1LNW9	4-hydroxyphenylpyruvate dioxygenase	Hpd	18	53.7	45.112	7.84e-99
P34058;D4A2Z9;D4AE04;F1LT18;F1LYW7;F1M2F7;F1M4X8;D3ZNW2;D3ZZB5;D3ZXC7	Heat shock protein HSP 90-beta	Hsp90ab1	33	40.3	83.28	0
P35213;P35213-2	14-3-3 protein beta/alpha;14-3-3 protein beta/alpha, N-terminally processed	Ywhab	4	22.4	28.054	2.17e-142
P35427;Q5RK10	60S ribosomal protein L13a	Rpl13a	15	56.2	23.476	2.86e-50
P35704;D4AAA7	Peroxiredoxin-2	Prdx2	7	31.3	21.783	5.13e-31
P36201;D4ACX1	Cysteine-rich protein 2	Crip2	8	62	22.696	2.03e-33
P36876;P56932;P97888;P36877-2;D3ZB24;P36877;F1M738	Serine/threonine-protein phosphatase 2A 55 kDa regulatory subunit B alpha isoform;Serine/threonine-protein phosphatase 2A 55 kDa regulatory subunit B delta isoform;Serine/threonine-protein phosphatase 2A 55 kDa regulatory subunit B gamma isoform;Serine/threonine-protein phosphatase 2A 55 kDa regulatory subunit B beta isoform	Ppp2r2a;Ppp2r2d;Ppp2r2c;Ppp2r2b	2	6.9	51.677	6.56e-21
P38650;D3ZGC7	Cytoplasmic dynein 1 heavy chain 1	Dync1h1	24	5	532.25	0
P38918	Aflatoxin B1 aldehyde reductase member 3	Akr7a3	8	26.9	36.747	2.5e-30
P38983	40S ribosomal protein SA	Rpsa	8	47.1	32.824	2.19e-98
P39052;P39052-2;D3ZLB8;D3ZQ20;P39052-3;P39052-4;D4A003;Q08877-5;D3ZI80;Q08877-3;D3ZMH6;Q08877;D4A2M6;Q08877-12;Q08877-6;D3ZNS3;D4AAP9;P21575;P21575-5;D4A850;Q08877-10;Q08877-4;D3ZQQ5;Q08877-7;D4A0D1;D4AAL9;Q08877-2;Q08877-13;P21575-4;P21575-8;Q08877-11;P21575-2;P21575-6;D3ZKN2;Q08877-9;P21575-3;P21575-7;Q08877-8	Dynamin-2	Dnm2	12	17.8	98.229	1.07e-87
P40329	Arginine--tRNA ligase, cytoplasmic	Rars	9	18.2	75.81	6.75e-91
P41034	Alpha-tocopherol transfer protein	Ttpa	8	30.9	31.845	2.21e-112
P41123;D4A075;D3ZRM9;D3ZD02;D3Z9H4;F1M2E9;F1LUH3;D3ZFF0	60S ribosomal protein L13	Rpl13;LOC100361259;LOC100360491;RGD1563145	14	44.5	24.309	7.49e-211
P41498;P41498-2	Low molecular weight phosphotyrosine protein phosphatase	Acp1	9	47.5	18.151	1.1e-168
P41542;D4AAH7;D4AAI0;REV__P59215;REV__P59215-2	General vesicular transport factor p115	Uso1	24	31.6	107.16	0
P46462	Transitional endoplasmic reticulum ATPase	Vcp	34	44.3	89.348	7.54e-264
P46844;Q6AZ33	Biliverdin reductase A	Blvra	3	12.5	33.565	2.26e-09
P46953	3-hydroxyanthranilate 3,4-dioxygenase	Haao	11	44.1	32.582	1.55e-54
P47942	Dihydropyrimidinase-related protein 2	Dpysl2	8	21.9	62.277	1.66e-163
P47967;G3V7N2	Galectin-5	Lgals5	2	15.2	16.196	5.19e-39
P48037;Q6IMZ3;D4ABR6	Annexin A6;Annexin	Anxa6	9	15.8	75.753	9.58e-24
P48500	Triosephosphate isomerase	Tpi1	8	43.8	26.849	1.79e-54
P48508	Glutamate--cysteine ligase regulatory subunit	Gclm	5	24.1	30.548	2.73e-71
P49242;Q6TXJ6;D3ZV98;D3ZFW0	40S ribosomal protein S3a;40S ribosomal protein S3b	Rps3a	25	67	29.945	1.67e-186
P50169	Retinol dehydrogenase 3	Rdh3	5	10.7	35.662	2.69e-63
P50237	Sulfotransferase 1C1	Sult1c1	16	62.2	35.764	2.83e-130
P50399	Rab GDP dissociation inhibitor beta	Gdi2	3	7.2	50.537	7.92e-07
P50475;F1LS09	Alanine--tRNA ligase, cytoplasmic	Aars	30	36.7	106.79	0
P50503	Hsc70-interacting protein	St13	3	9	41.279	0.00026615
P51635	Alcohol dehydrogenase [NADP(+)]	Akr1a1	9	32.6	36.505	1.35e-51
P52631;D3Z8V9	Signal transducer and activator of transcription 3	Stat3	20	34.9	88.039	0
P52759;F8WFW1	Ribonuclease UK114	Hrsp12	7	57.7	14.303	2.86e-32
P52845;P49889;F1LNK1;Q9WUW9;D3ZK28;F1LZT0	Estrogen sulfotransferase, isoform 2;Estrogen sulfotransferase, isoform 3	Ste2;Ste	3	6.1	35.364	2.38e-49
P52847	Sulfotransferase family cytosolic 1B member 1	Sult1b1	22	61.5	34.835	0
P52873	Pyruvate carboxylase, mitochondrial	Pc	47	48.3	129.78	0
P52944	PDZ and LIM domain protein 1	Pdlim1	4	19.3	35.584	9.54e-20
P54319;D3ZDI0	Phospholipase A-2-activating protein	Plaa	10	15.2	87.083	1.54e-130
P54777;D3ZBJ9;F8WG23	Peroxisome assembly factor 2	Pex6	17	21.3	104.43	4.13e-80
P55006;F1LVY2;D3ZBV0;D3ZJP5	Retinol dehydrogenase 7	Rdh7	3	6	35.736	1.27e-104
P55051	Fatty acid-binding protein, brain	Fabp7	3	31.1	14.864	2.94e-13
P55159	Serum paraoxonase/arylesterase 1	Pon1	4	12.7	39.358	1.85e-31
P56571	ES1 protein homolog, mitochondrial		8	33.1	28.172	8.29e-169
P56574	Isocitrate dehydrogenase [NADP], mitochondrial	Idh2	7	22.3	50.967	5.7e-58
P57093	Phytanoyl-CoA dioxygenase, peroxisomal	Phyh	12	33.7	38.588	3.04e-66
P57113	Maleylacetoacetate isomerase	Gstz1	9	47.2	23.961	1.09e-88
P60901	Proteasome subunit alpha type-6	Psma6	2	9.3	27.399	3.81e-06
P61206;P84079;P84082;F1M0J2	ADP-ribosylation factor 3;ADP-ribosylation factor 1;ADP-ribosylation factor 2	Arf3;Arf1;Arf2	4	28.7	20.601	3.49e-111
P61314;D3ZU80;D3ZXA2;D3ZF52	60S ribosomal protein L15;Ribosomal protein L15	Rpl15;RGD1560501	15	56.9	24.146	8.4e-78
P61354;D4AD41;D3ZTK5;D3ZYF9;D3ZZV8;F1M0X8	60S ribosomal protein L27	Rpl27;LOC688784;RGD1563835;RGD1565900	12	66.2	15.798	3.05e-104
P61515;F1LNS9;D4A7B1;D4AAZ6;D3ZGU1;D4A829;F1M3Q2	Putative 60S ribosomal protein L37a;60S ribosomal protein L37a	Rpl37a-ps1;LOC679823;Rpl37a	8	73.9	10.275	6.27e-39
P61983	14-3-3 protein gamma;14-3-3 protein gamma, N-terminally processed	Ywhag	4	17.8	28.302	9.25e-55
P62083;Q6AY74;D4AC24;F1M8D1	40S ribosomal protein S7	Rps7	13	66.5	22.127	1.7e-166
P62193	26S protease regulatory subunit 4	Psmc1	24	56.6	49.184	9.2e-262
P62198	26S protease regulatory subunit 8	Psmc5	29	74.9	45.626	0
P62243;D3ZIE1;Q6TXJ0;D3ZT31;F1M7J4	40S ribosomal protein S8	Rps8;RGD1566369;LOC297756	16	52.4	24.205	2.12e-235
P62246;D3ZLL8;D4A8P1;D3ZZC7;D3ZS61;D3ZFC7;D3ZQT6;F1M5P5	40S ribosomal protein S15a	Rps15a;LOC100361715;LOC687680;LOC100362139	9	46.2	14.839	4.76e-214
P62260	14-3-3 protein epsilon	Ywhae	7	25.1	29.174	1.9e-71
P62268;D4A9Q3	40S ribosomal protein S23	Rps23;RGD1563570	6	30.1	15.807	8.74e-25
P62271;D3ZM33;D3ZII2;D3ZAU6;F1M6D1;D4AA93;F1M2A2	40S ribosomal protein S18	Rps18;LOC100362298;RGD1562404;RGD1561919	23	67.8	17.718	5.36e-144
P62275	40S ribosomal protein S29	Rps29	5	58.9	6.6767	5.82e-39
P62278;F1LMB4	40S ribosomal protein S13	Rps13	11	46.4	17.222	5.98e-69
P62703;D3ZX01;D4AEI1;D3ZFZ5;D3ZJQ1	40S ribosomal protein S4, X isoform	Rps4x	25	72.2	29.597	1.24e-198
P62716;P63331;D3ZHP2	Serine/threonine-protein phosphatase 2A catalytic subunit beta isoform;Serine/threonine-protein phosphatase 2A catalytic subunit alpha isoform;Serine/threonine-protein phosphatase	Ppp2cb;Ppp2ca	2	10.7	35.575	1.39e-70
P62755;D3Z9H5;D3ZBN8;D4A8N8	40S ribosomal protein S6	Rps6	19	45.4	28.68	0
P62804;F1M449	Histone H4;Osteogenic growth peptide	Hist1h4b	5	39.8	11.367	6.59e-15
P62815;D3ZZS8	V-type proton ATPase subunit B, brain isoform	Atp6v1b2	10	24.1	56.55	1.4e-61
P62828;Q66H11;Q8K586	GTP-binding nuclear protein Ran;GTP-binding nuclear protein Ran, testis-specific isoform	Ran;RGD1306195;Rasl2-9	8	35.6	24.423	1.46e-72
P62832;D3ZUS1	60S ribosomal protein L23	Rpl23	13	70.7	14.865	9.75e-186
P62836;Q62636	Ras-related protein Rap-1A;Ras-related protein Rap-1b	Rap1a;Rap1b	2	13.6	20.987	1.91e-12
P62845;D3ZAK6	40S ribosomal protein S15	Rps15;LOC100360484	7	46.9	17.04	2.33e-90
P62853;F1M6F4;D4AE10;D3ZCH5;D3ZWX8	40S ribosomal protein S25	Rps25;RGD1564597;RGD1563613;LOC100359763;LOC685085	9	48	13.742	8.63e-89
P62856;D3Z8D7;F1M3V7;F1M6H7;D3ZJ54;D4AAJ9;F1LYT3;F1M5Y5	40S ribosomal protein S26	Rps26;LOC100361854;RGD1562415;LOC100361756;RGD1565117	5	39.1	13.015	7.15e-23
P62890;D4A1E6;D3ZA94;F1M3Q4	60S ribosomal protein L30	Rpl30	6	56.5	12.784	5.64e-34
P62893	60S ribosomal protein L39	Rpl39	2	23.5	6.4066	6.05e-12
P62902;D3ZX87;D4ABZ9;D4ACQ2;D3ZKU5;D3ZZ60;D3ZU04;D3ZK34;D3Z8W1	60S ribosomal protein L31	Rpl31;LOC100361974;LOC690384;RGD1564839;LOC681356;RGD1565894;LOC680384	2	18.4	14.463	2.88e-42
P62907;D4A7Y6;F1LYQ7;D3ZBX4;F1M8D2;D3Z9F6	60S ribosomal protein L10a;Ribosomal protein	Rpl10a;RGD1566137;LOC680700;RGD1559639	11	41.5	24.831	5.06e-67
P62909;D3ZVH2	40S ribosomal protein S3	Rps3;RGD1560831	23	82.7	26.674	5.32e-189
P62912;D4A890;D4A412;D4A8R0;D3ZAC3;D3ZWL0;D3ZRY2;D4ACC7	60S ribosomal protein L32	Rpl32;LOC100363713	7	34.8	15.86	1.21e-50
P62914;F2Z3S4	60S ribosomal protein L11	Rpl11	11	39.9	20.252	1.32e-70
P62919;D4A6W6	60S ribosomal protein L8	Rpl8;RGD1561333	17	44.7	28.024	5.51e-137
P62944-2;P62944	AP-2 complex subunit beta	Ap2b1	10	10.7	105.69	5.88e-57
P62963;CON__P02584	Profilin-1	Pfn1	9	67.1	14.957	3.19e-186
P62982;D3ZCM1;F1LML2;Q63429;P0CG51;G3V9Z2;P62986;F1M5M5;F1M5P0;F1M4U4;F1LU69;D4A0J6;F1LYW3;F1M927;F1M282;F1M0Q4;F1M9H9;F1M516;D4A2F5;F1M148;F1M3P8;F1M2X0	Ubiquitin-40S ribosomal protein S27a;Ubiquitin;40S ribosomal protein S27a;Polyubiquitin-C;Ubiquitin;Ubiquitin-related;Polyubiquitin-B;Ubiquitin;Ubiquitin-60S ribosomal protein L40;Ubiquitin;60S ribosomal protein L40	Rps27a;Ubc;Ubb;LOC100360548;Uba52	11	69.9	17.951	9.95e-96
P62997;D3ZLN0;F1LVK5	Transformer-2 protein homolog beta	Tra2b	9	33.7	33.665	2.36e-34
P63018;D4A4S3;F1LLW5;F1LZI1;P14659;F1M2Y7;D3ZH98;F1LPF5;P55063;Q07439;F1LM52	Heat shock cognate 71 kDa protein	Hspa8	34	51.4	70.87	0
P63036	DnaJ homolog subfamily A member 1	Dnaja1	11	34.5	44.868	6.01e-156
P63039;D4ABH6;D3Z9X1;D3ZVX2;F1M6U4	60 kDa heat shock protein, mitochondrial	Hspd1	28	46.6	60.955	1.97e-170
P63102	14-3-3 protein zeta/delta	Ywhaz	6	26.9	27.771	5.45e-158
P63174;D4AD70;D3ZZH2;D3ZW57;D4A862	60S ribosomal protein L38	Rpl38;RGD1561636;LOC680353;LOC100365156	6	57.1	8.2178	6.47e-42
P63245	Guanine nucleotide-binding protein subunit beta-2-like 1	Gnb2l1	14	46.1	35.076	7.21e-134
P67779;D3ZN73;D4A508;D3ZFE2;F1LWX0	Prohibitin	Phb	3	12.5	29.82	4.57e-14
P68035;P68136	Actin, alpha cardiac muscle 1;Actin, alpha skeletal muscle	Actc1;Acta1	2	8.8	42.019	0
P68101	Eukaryotic translation initiation factor 2 subunit 1	Eif2s1	5	27.3	36.108	3.8e-69
P68511	14-3-3 protein eta	Ywhah	2	12.6	28.211	4.73e-41
P69897	Tubulin beta-5 chain	Tubb5	3	9.7	49.67	0
P70470	Acyl-protein thioesterase 1	Lypla1	4	18.7	24.708	1.13e-11
P70567;Q6IMZ5;D3ZSG3	Tropomodulin-1	Tmod1	7	26.2	40.48	1.33e-41
P80254	D-dopachrome decarboxylase	Ddt	5	50.8	13.133	2.18e-18
P81795;D3ZSB4	Eukaryotic translation initiation factor 2 subunit 3	Eif2s3	5	15.7	51.079	4.45e-83
P82995;F1LTA7;D3ZE66;F1M5B6;D4ABF9;D3ZSM0	Heat shock protein HSP 90-alpha	Hsp90aa1	17	23.5	84.814	0
P83732	60S ribosomal protein L24	Rpl24	10	51.6	17.779	4.49e-47
P83868	Prostaglandin E synthase 3	Ptges3	2	16.9	18.721	3.35e-16
P84092;D3ZSE7;F1LZR8	AP-2 complex subunit mu	Ap2m1	16	34.5	49.654	3.2e-62
P84100;F1M5A9;D3ZYJ9;F1LYA5;F1LZL7	60S ribosomal protein L19	Rpl19	16	46.4	23.466	3.92e-137
P85108;Q3KRE8	Tubulin beta-2A chain;Tubulin beta-2B chain	Tubb2a;Tubb2b	6	22.2	49.906	0
P85834;F8WFG8	Elongation factor Tu, mitochondrial	Tufm	13	31.6	49.522	3.67e-127
P85973;D3ZXK9	Purine nucleoside phosphorylase	Pnp	12	52.9	32.302	1.02e-146
P97524;D3ZSL9;D3ZUP3;F1LRI0	Very long-chain acyl-CoA synthetase	Slc27a2	22	41.8	70.693	0
P97532	3-mercaptopyruvate sulfurtransferase	Mpst	4	14.5	32.94	3.59e-21
P97536;F8WGA1;D4AAI5;Q9R0L4-2	Cullin-associated NEDD8-dissociated protein 1	Cand1	27	25.3	136.36	2.23e-255
P97608	5-oxoprolinase	Oplah	26	26.2	137.72	1.39e-216
Q02974;D3ZN65;Q02974-2	Ketohexokinase	Khk	7	18.5	32.749	6.19e-54
Q03248;D3Z8J1	Beta-ureidopropionase	Upb1	12	45.8	44.042	4.4e-219
Q03336	Regucalcin	Rgn	21	62.2	33.389	0
Q04462	Valine--tRNA ligase	Vars	5	6.6	140.37	1.32e-76
Q06647	ATP synthase subunit O, mitochondrial	Atp5o	13	65.3	23.397	1.91e-165
Q07009	Calpain-2 catalytic subunit	Capn2	3	4	79.918	9.52e-15
Q07014;Q07014-2;Q4KM97	Tyrosine-protein kinase Lyn	Lyn	4	10.4	58.659	1.57e-29
Q07071	Glucokinase regulatory protein	Gckr	12	27.6	68.917	5.84e-150
Q09073;D4A481;Q05962;Q6P9Y4;D3ZE29;F1LZS8;D3ZB81;F1LXE6;D4A2A1	ADP/ATP translocase 2;ADP/ATP translocase 1	Slc25a5;Slc25a4	13	38.6	32.901	1.54e-34
Q09167;F8WFV0;Q09167-2	Serine/arginine-rich splicing factor 5	Srsf5	7	27.5	30.891	3.84e-20
Q0VGK3	Glycerate kinase	Glyctk	9	18.5	55.187	3.62e-177
Q0ZFS8;D3ZL34;F1LT59		Srsf3;rCG_61099	13	51.2	19.329	1.12e-136
Q0ZHH6;F1LR13;Q0ZHH6-2;Q6PST4;D3ZJE7	Atlastin-3	Atl3	5	9.2	60.585	9.32e-28
Q10758;CON__H-INV:HIT000292931;CON__Q9H552;CON__P08729;CON__Q3KNV1;CON__Q9DCV7;Q6IG12;G3V712;CON__Q6ISB0;CON__Q9NSB2;CON__H-INV:HIT000016045;CON__REFSEQ:XP_092267	Keratin, type II cytoskeletal 8	Krt8	17	28.4	54.018	0
Q1JU68;F1LRG1	Eukaryotic translation initiation factor 3 subunit A	Eif3a	25	19.1	163.19	3.52e-106
Q2PQA9;F1M8F2;G3V6L4;Q6QLM7;P56536	Kinesin-1 heavy chain	Kif5b	18	24.3	109.53	6.59e-221
Q32PZ3	Protein unc-45 homolog A	Unc45a	14	15.4	103.24	2.21e-43
Q32Q06;D3ZRP6	AP-1 complex subunit mu-1	Ap1m1	13	40	48.556	7.94e-97
Q3B7U9	Peptidyl-prolyl cis-trans isomerase FKBP8	Fkbp8	5	13.9	43.555	6.92e-22
Q3KRE0;F8WFF6	ATPase family AAA domain-containing protein 3	Atad3;Atad3a	4	9.5	66.758	1.58e-14
Q3KRF2;Q9Z1A6;D3ZWX5;Q6P513	Vigilin	Hdlbp	53	48.4	141.69	0
Q3MHS9;D4AD79;D3ZZG6		Cct6a	17	32.2	58.017	9.09e-164
Q3MIB4;D4A1B4;Q6TXI3	Lon protease homolog 2, peroxisomal;Lon protease homolog	Lonp2	5	11.6	94.392	2.42e-48
Q3MID4		Shpk	4	11.4	50.638	2.38e-99
Q3MIE0	Enoyl-CoA hydratase domain-containing protein 3, mitochondrial	Echdc3	6	22	32.385	1.33e-18
Q3MIE4		Vat1	6	19.6	43.118	2.61e-32
Q3T1J1;G3V7J7;D3ZWY2	Eukaryotic translation initiation factor 5A-1	Eif5a;Eif5a2	5	18.8	16.832	1.19e-22
Q3T1K5	F-actin-capping protein subunit alpha-2	Capza2	9	53.8	32.967	2.99e-202
Q3T1L0	Aldehyde dehydrogenase family 16 member A1	Aldh16a1	17	22.9	85.413	1.2e-129
Q497B0	Omega-amidase NIT2	Nit2	19	52.5	30.701	1.63e-302
Q498D8		Rbx1	2	17.6	12.274	4.83e-39
Q499N6;D3ZK51	UBX domain-containing protein 1	Ubxn1	5	22.2	33.581	8.84e-20
Q499Q4;P38652;D3ZSP5	Phosphoglucomutase-1	Pgm1	13	27	61.389	1.51e-44
Q499R7		Ppa1	10	36.9	37.676	2.11e-155
Q4AEF8;D4A4V0	Coatomer subunit gamma	Copg	17	28.4	97.613	0
Q4FZT9	26S proteasome non-ATPase regulatory subunit 2	Psmd2	19	28	100.19	3.63e-259
Q4G079		Aimp1	7	33.3	34.574	1.6e-194
Q4KLP0;D3ZZJ9;F1LQZ8	Probable 2-oxoglutarate dehydrogenase E1 component DHKTD1, mitochondrial	Dhtkd1;LOC100362392	6	9.1	102.64	3.88e-35
Q4KLZ6	Bifunctional ATP-dependent dihydroxyacetone kinase/FAD-AMP lyase (cyclizing);ATP-dependent dihydroxyacetone kinase;FAD-AMP lyase (cyclizing)	Dak	25	47.9	59.443	0
Q4KM73;D3ZX23	UMP-CMP kinase	Cmpk1	11	66.3	22.169	8.54e-75
Q4KM74	Vesicle-trafficking protein SEC22b	Sec22b	10	55.8	24.74	2.89e-149
Q4V8H5		Dnpep	14	40.2	52.555	2.59e-234
Q4V8I5	ADP-ribosylation factor-like protein 6-interacting protein 4	Arl6ip4	4	26	25.769	6.16e-48
Q505J8	Phenylalanine--tRNA ligase alpha subunit	Farsa	14	31.5	57.719	0
Q562C4	Methyltransferase-like protein 7B	Mettl7b	10	33.6	27.904	8.58e-115
Q58FK9;G3V827;Q08415;Q08415-2;D4A0T4;D4A635;F1M572	Kynurenine--oxoglutarate transaminase 3	Ccbl2	10	26	51.044	1.12e-103
Q5BJN1		Stard10	4	19	32.904	1.43e-21
Q5BJN7;P62864	40S ribosomal protein S30	Fau	2	8.3	14.372	1.19e-08
Q5BJQ0	Chaperone activity of bc1 complex-like, mitochondrial	Adck3	3	7.7	72.225	1.77e-49
Q5BJT0;D3ZE69	Arginine and glutamate-rich protein 1	Arglu1	11	29.9	32.887	3.42e-25
Q5BJZ3;D3ZBZ4		Nnt	3	3.3	113.87	5.75e-07
Q5D059;P61980	Heterogeneous nuclear ribonucleoprotein K	Hnrnpk	7	18.5	51.028	7.63e-182
Q5EBD0;Q99MS0	SEC14-like protein 2	Sec14l2	5	13.4	46.205	1.67e-19
Q5FVR5;D3ZYP4	Acyl-coenzyme A amino acid N-acyltransferase 2	Acnat2;Acnat1	7	22	46.01	3.38e-84
Q5HZE4	Methylthioribose-1-phosphate isomerase	Mri1	8	16.5	39.587	6.08e-30
Q5HZY2;Q6AY18	GTP-binding protein SAR1b	Sar1b;Sar1a	3	15.2	22.41	3.02e-07
Q5I0K1		Pipox	4	15.4	43.89	2.76e-12
Q5I0M2	Nicotinate-nucleotide pyrophosphorylase [carboxylating]	Qprt	5	18.1	31.297	2.17e-36
Q5I0N4;Q62730	Estradiol 17-beta-dehydrogenase 2	Hsd17b2	2	7.6	42.039	5.92e-09
Q5M7U6;D3ZEA6;D3ZEF5	Actin-related protein 2	Actr2	13	37.6	44.733	2.06e-116
Q5M7V8;F1M3B8	Thyroid hormone receptor-associated protein 3	Thrap3	6	9.1	108.25	5.72e-23
Q5M849		Ifi35	5	20.6	31.764	1.54e-71
Q5M875;D3ZHH7;D4A675	17-beta-hydroxysteroid dehydrogenase 13	Hsd17b13	9	30.3	33.494	7.96e-100
Q5M884		Eci3	12	40.6	33.686	5.44e-71
Q5M9H2;D3ZMF5;P45953	Very long-chain specific acyl-CoA dehydrogenase, mitochondrial	Acadvl	13	24.3	70.821	1.5e-127
Q5M9I6	Multiple myeloma tumor-associated protein 2 homolog	Mmtag2	2	10.4	29.299	1.28e-05
Q5PPL3	Sterol-4-alpha-carboxylate 3-dehydrogenase, decarboxylating	Nsdhl	9	21.5	40.411	3.15e-35
Q5PQU1;P01048	T-kininogen 1;T-kininogen 1 heavy chain;T-kinin;T-kininogen 1 light chain	Kng1;Map1	3	13.3	47.764	1.49e-21
Q5RJR2	Twinfilin-1	Twf1	7	28.9	40.09	3.41e-90
Q5RJR8	Leucine-rich repeat-containing protein 59	Lrrc59	8	26.4	34.869	1.19e-36
Q5RK30	Ribosome maturation protein SBDS	Sbds	3	15.2	28.752	2.05e-120
Q5RKH2		Galk1	16	35.7	42.376	1.02e-221
Q5RKH9		Derl1	2	7.6	28.834	2.36e-05
Q5RKI0	WD repeat-containing protein 1	Wdr1	22	50.8	66.181	0
Q5RKI5		Flii	10	12.4	144.86	2.49e-67
Q5RKL4;Q63342	Dimethylglycine dehydrogenase, mitochondrial	Dmgdh	4	6.8	95.976	2.49e-12
Q5U2S7;D4A341		Psmd3	21	37.2	60.687	0
Q5U2T9		Fkbp5	2	4.6	50.964	6.64e-07
Q5U2U8		Bag3	5	9.4	61.49	1.24e-39
Q5U300	Ubiquitin-like modifier-activating enzyme 1	Uba1	7	9.1	117.79	3.04e-16
Q5U302;D4A6H8		Ctnna1	13	21	100.24	2.87e-212
Q5XFW8	Protein SEC13 homolog	Sec13	4	15.8	35.547	4.22e-86
Q5XI26		Stat2	7	8.4	96.856	1.08e-31
Q5XI32;D3ZPF3;D3Z8M9;F1M1E3	F-actin-capping protein subunit beta	Capzb	13	40.4	30.628	4.94e-122
Q5XI34;D4A1Y3;Q4QQT4		Ppp2r1a	13	25.3	65.322	2.31e-209
Q5XI55;Q5XI55-2;F1LLZ5	Peptide-N(4)-(N-acetyl-beta-glucosaminyl)asparagine amidase	Ngly1	9	14.6	74.676	3.51e-20
Q5XI73	Rho GDP-dissociation inhibitor 1	Arhgdia	3	23.5	23.407	4.19e-12
Q5XI81;F1LSD7;F1LZ14;F1M2C2;F1M3Y6;E9PSS4;Q80WE1;Q80WE1-2;E9PSS6;E9PTH3	Fragile X mental retardation syndrome-related protein 1	Fxr1;Fxr2	6	11.6	63.947	3.22e-23
Q5XIC1	Mannose-1-phosphate guanyltransferase alpha	Gmppa	5	13.3	46.191	1.08e-17
Q5XIC6;D3Z8B3;D3Z936		Psmd12	11	28.5	52.936	7.88e-126
Q5XIF6	Tubulin alpha-4A chain	Tuba4a	8	16.1	49.924	0
Q5XIG6	N-acetylgalactosamine kinase	Galk2	4	8.7	50.197	7.21e-16
Q5XIH7;D4A278	Prohibitin-2	Phb2	7	26.4	33.312	6.36e-18
Q5XIM7;D4ABR8	Lysyl-tRNA synthetase	Kars	2	3.4	71.622	2.72e-05
Q5XIM9	T-complex protein 1 subunit beta	Cct2	13	30.7	57.458	1.71e-121
Q5XIU5;F1M7S2	Proteasome inhibitor PI31 subunit	Psmf1	3	19.9	29.854	1.47e-15
Q60587	Trifunctional enzyme subunit beta, mitochondrial;3-ketoacyl-CoA thiolase	Hadhb	11	33.5	51.414	1.85e-66
Q62669		MGC72973	7	63.3	16.022	4.33e-90
Q62780;D3ZD06	Probable ATP-dependent RNA helicase DDX46	Ddx46	2	1.8	117.38	3.91e-05
Q62991;D3ZNA2;D3ZYJ4;F1LT51	Sec1 family domain-containing protein 1	Scfd1	9	22.4	72.262	3.42e-111
Q63041	Alpha-1-macroglobulin;Alpha-1-macroglobulin 45 kDa subunit	A1m	19	14.3	167.12	6.37e-186
Q63081	Protein disulfide-isomerase A6	Pdia6	11	29.3	48.173	1.79e-145
Q63150	Dihydropyrimidinase	Dpys	15	35.5	56.814	1.34e-234
Q63228;D3ZTK6;F1LS90	Glia maturation factor beta	Gmfb	7	40.1	16.736	9.14e-86
Q63276	Bile acid-CoA:amino acid N-acyltransferase	Baat	16	48.6	46.464	0
Q63356;F1LS04;D4A7X9;F1M3K9	Unconventional myosin-Ie	Myo1e	4	3.8	126.83	1.98e-13
Q63357;D3ZKZ9;F1LQ75	Unconventional myosin-Id	Myo1d	22	29.3	116.09	4.47e-216
Q63396	Activated RNA polymerase II transcriptional coactivator p15	Sub1	8	51.2	14.441	2.83e-27
Q63570;F1LZ09	26S protease regulatory subunit 6B	Psmc4	22	49.8	47.408	1.23e-212
Q63584;F1LYL3;F1LWT3	Transmembrane emp24 domain-containing protein 10	Tmed10	4	21.5	24.857	3.31e-16
Q63610-2;Q63610-3;F2Z3T2		Tpm3	2	11.7	28.72	0
Q63610;F1LRP5;F1M931;Q9QX07	Tropomyosin alpha-3 chain	Tpm3	9	27.4	29.006	0
Q63692;F1LRF0;D3ZA91	Hsp90 co-chaperone Cdc37	Cdc37	6	22.7	44.51	3.75e-62
Q63716	Peroxiredoxin-1	Prdx1	13	50.3	22.109	3.73e-122
Q63798	Proteasome activator complex subunit 2	Psme2	3	16	26.857	3.52e-53
Q63910		LOC287167	4	36.6	15.524	1.19e-17
Q63965;Q6AYS2	Sideroflexin-1	Sfxn1	3	12.4	35.546	5.95e-07
Q64057	Alpha-aminoadipic semialdehyde dehydrogenase	Aldh7a1	13	27.5	58.748	2.57e-49
Q641Y8	ATP-dependent RNA helicase DDX1	Ddx1	10	14.9	82.496	5.17e-126
Q641Z6;F8WFQ1;Q4V8H8	EH domain-containing protein 1	Ehd1	11	34.1	60.602	1.11e-245
Q64232	Trans-2,3-enoyl-CoA reductase	Tecr	4	8.1	36.122	5.15e-11
Q642E2;D3ZJD3;D3ZEI0;P17702;D3ZG08;D4A8B6;Q6TUD7	60S ribosomal protein L28	Rpl28;LOC100362069;LOC690096;RGD1565183	16	67.2	15.733	1.45e-126
Q64428;F1M9X9	Trifunctional enzyme subunit alpha, mitochondrial;Long-chain enoyl-CoA hydratase;Long chain 3-hydroxyacyl-CoA dehydrogenase	Hadha	22	27.7	82.664	4.13e-171
Q64550;Q6T5F2;Q6T5E8;Q6T5F0;Q6T5F1;Q6T5E7;Q6T5F3;F1MA28;P20720;Q64633;Q64637;Q64638;Q64634	UDP-glucuronosyltransferase 1-1;UDP-glucuronosyltransferase 1-2;UDP-glucuronosyltransferase 1-7;UDP-glucuronosyltransferase 1-3;UDP-glucuronosyltransferase 1-5;UDP-glucuronosyltransferase 1-8	Ugt1a1;Ugt1a2;Ugt1a7c;Ugt1a3;Ugt1a8;Ugt1a9;Ugt1	2	5	59.662	3.88e-19
Q64602	Kynurenine/alpha-aminoadipate aminotransferase, mitochondrial	Aadat	10	25.4	47.784	1.35e-102
Q64611;F1LPX2	Cysteine sulfinic acid decarboxylase	Csad	15	36.7	55.248	9.95e-86
Q64620	Serine/threonine-protein phosphatase 6 catalytic subunit	Ppp6c	3	10.8	35.159	6.76e-10
Q64640	Adenosine kinase	Adk	7	17.2	40.133	1.38e-26
Q66H15	Regulator of microtubule dynamics protein 3	Fam82a2	2	7.6	52.311	2.31e-05
Q66H80	Coatomer subunit delta	Arcn1	11	24.9	57.199	5.26e-41
Q66HA8;F8WFH0;F1M3G6;F1LRV4;O88600	Heat shock protein 105 kDa	Hsph1	12	16.7	96.417	1.66e-66
Q66HD0;Q66HD0-2;D3ZUA3	Endoplasmin	Hsp90b1	26	35.8	92.77	0
Q66HF3;Q6UPE1	Electron transfer flavoprotein-ubiquinone oxidoreductase, mitochondrial	Etfdh	5	8.6	68.163	1.02e-09
Q66HM2;P18484;D4A101	AP-2 complex subunit alpha-2	Ap2a2	13	15.2	104.17	4.41e-174
Q66X93;D4A8Y5;D3ZH86	Staphylococcal nuclease domain-containing protein 1	Snd1	11	17.3	101.95	1.67e-96
Q68FP2	Serum paraoxonase/lactonase 3	Pon3	3	10.7	39.458	2.47e-14
Q68FQ0	T-complex protein 1 subunit epsilon	Cct5	17	37.5	59.536	1.15e-201
Q68FR6;F1M5E1	Elongation factor 1-gamma	Eef1g	11	24	50.06	2.49e-33
Q68FS1	Cytosolic Fe-S cluster assembly factor NUBP2	Nubp2	3	13.3	28.926	1.06e-24
Q68FS4;Q68FS4-2	Cytosol aminopeptidase	Lap3	10	25	56.149	1.87e-56
Q68FT7		Farsb	8	14.9	65.651	1.3e-51
Q68FU3	Electron transfer flavoprotein subunit beta	Etfb	9	42.4	27.687	1.32e-46
Q68FY0;Q03346	Cytochrome b-c1 complex subunit 1, mitochondrial	Uqcrc1	3	5	52.848	0.00010608
Q68G19;P36511	UDP-glucuronosyltransferase 2B15	Ugt2b15	4	13.6	61.026	4.34e-33
Q68G31	Phenazine biosynthesis-like domain-containing protein	Pbld	14	56.6	31.687	5.7e-288
Q6AXS5;Q6AXS5-2	Plasminogen activator inhibitor 1 RNA-binding protein	Serbp1	9	26.3	44.754	2.15e-100
Q6AXW2;P70566		Tmod3	18	54.8	39.471	0
Q6AY30;D4A8I1	Saccharopine dehydrogenase-like oxidoreductase	Sccpdh	3	8.2	47.088	2.94e-06
Q6AY58		Bcap31	4	11	27.911	8.89e-10
Q6AYD3		Pa2g4	5	16.5	43.656	2.24e-54
Q6AYD5		Gspt1	6	9.7	68.751	5.81e-26
Q6AYH5	Dynactin subunit 2	Dctn2	12	43	44.147	2.2e-165
Q6AYI1;D4A9J1		Ddx5	19	30.7	69.238	3.78e-166
Q6AYK8	Eukaryotic translation initiation factor 3 subunit D	Eif3d	4	10.8	63.988	1e-43
Q6AYS7;Q6PTT0	Aminoacylase-1A	Acy1a	12	30.9	45.804	1.6e-50
Q6AYS8	Estradiol 17-beta-dehydrogenase 11	Hsd17b11	3	15.1	32.937	4.38e-14
Q6AYT3	tRNA-splicing ligase RtcB homolog		18	41	55.249	1.51e-293
Q6AYW2;P04176	Phenylalanine-4-hydroxylase	Pah	26	56.3	51.819	0
Q6DGG1;F1M2R0;F1M5R3	Abhydrolase domain-containing protein 14B	Abhd14b	9	46.2	22.618	1.68e-178
Q6I7R1		Dhrs7	3	9.3	36.402	2.81e-56
Q6IMY8		Hnrnpu	14	18.5	87.731	6.41e-175
Q6IN39;P97852	Peroxisomal multifunctional enzyme type 2;(3R)-hydroxyacyl-CoA dehydrogenase;Enoyl-CoA hydratase 2	Hsd17b4	23	34	81.088	6.78e-215
Q6MG08;F1LQF0	ATP-binding cassette sub-family F member 1	Abcf1	4	8.6	95.251	5.1e-155
Q6MG49;D3ZX75;Q6MG49-2	Large proline-rich protein BAG6	Bag6	20	23.2	120.01	5.94e-130
Q6P0K8	Junction plakoglobin	Jup	15	23	81.8	4.23e-44
Q6P3V8		Eif4a1	11	26.1	46.153	0
Q6P3V9;P50878	60S ribosomal protein L4	Rpl4	32	51.8	47.3	0
Q6P502;F1M1I0	T-complex protein 1 subunit gamma	Cct3	27	53.8	60.646	3.32e-290
Q6P685;D3ZBJ7		Eif2s2	4	11.4	38.243	8.31e-14
Q6P6U2;Q63569;D3ZF94;D3ZL65	26S protease regulatory subunit 6A	Psmc3	24	56.1	49.548	2.31e-255
Q6P7B0;F8WFH8	Tryptophan--tRNA ligase, cytoplasmic;T1-TrpRS;T2-TrpRS	Wars	7	22.7	54.143	1.35e-171
Q6P7R8;D3ZPU3	Estradiol 17-beta-dehydrogenase 12	Hsd17b12	6	18.3	34.84	1.31e-15
Q6P9V7;Q63797;F1M0Q8;F1M5C5	Proteasome activator complex subunit 1	Psme1	4	18.9	28.635	1.35e-38
Q6PCT9		Psmd6	7	21.6	45.598	1.22e-71
Q6PDV7;D4A1P2;D3ZXN2	60S ribosomal protein L10	Rpl10;Rpl10l	21	67.8	24.604	2.62e-185
Q6PDV8;F1M3S4;D3ZSC4;P47198		LOC100363800;LOC100360057	6	30.5	14.759	2.91e-60
Q6PDW1;D3ZMD2;D3ZHB3;D3ZJZ4;P63324;F1M185;D3ZG05;D3ZV36;F1M8X3	40S ribosomal protein S12	LOC100359593;LOC100360558;LOC100360573;LOC100360642;Rps12	8	57.6	14.515	5.29e-63
Q6Q0N1;F1LUD0	Cytosolic non-specific dipeptidase	Cndp2	8	19.2	52.693	5.12e-32
Q6QI09;Q6PCU0;P35435	ATP synthase gamma chain;ATP synthase subunit gamma, mitochondrial	LOC100360100;Atp5c1	10	15.8	67.72	3.5e-101
Q6QI93;Q3ZAV8	Enhancer of mRNA-decapping protein 4	Edc4	11	10.7	163.25	5e-113
Q6T487;Q9Z1P2;Q6GMN8;F1M1N4	Alpha-actinin-1	Actn1	6	10	105.47	3.82e-148
Q6TMG5;F1LM08	NF-kappa-B essential modulator	Ikbkg	6	13.3	48.066	1.96e-32
Q6TXG7;Q4KLG7	Serine hydroxymethyltransferase	Shmt1	18	29.1	75.373	5.9e-198
Q6UPE0;F1LVR2		Chdh	2	4.7	66.388	2.53e-05
Q71TY3;D3ZNZ8	40S ribosomal protein S27	Rps27;LOC100362405	3	15.5	9.461	3.22e-34
Q75N33;D3ZUF6;F1LNQ6;D4AAW2	Protein transport protein Sec16B	Sec16b	15	20.6	116.9	5.9e-105
Q793F9;Q6IRG3;Q6GX84	Vacuolar protein sorting-associated protein 4A	Vps4a	6	16.9	48.906	8.56e-31
Q794E4;F1LV61	Heterogeneous nuclear ribonucleoprotein F;Heterogeneous nuclear ribonucleoprotein F, N-terminally processed	Hnrnpf	4	13	45.729	1.08e-73
Q7M0E3;D4A315	Destrin	Dstn	6	35.8	18.533	6.52e-140
Q7TP08;G3V8F9;P70473	Alpha-methylacyl-CoA racemase	Amacr	4	10.1	49.884	9.41e-11
Q7TP15;D3Z943		Mtap	2	9	43.08	2e-11
Q7TP42		Sec62	7	6.8	67.93	4.86e-22
Q7TP52	Carboxymethylenebutenolidase homolog	Cmbl	3	14.7	27.903	8.76e-20
Q7TP57;F1M9D6;F1M4K4		Stat4	24	23.9	134.61	0
Q7TPB1	T-complex protein 1 subunit delta	Cct4	15	36.5	58.099	3.89e-109
Q7TPJ1;A1L1K2		Igtp	13	16.1	161.63	2.38e-152
Q7TQ16	Cytochrome b-c1 complex subunit 8	Uqcrq	4	39	9.8492	3.76e-10
Q7TT49;G3V6C9;O54874;D3ZR44;D4A247	Serine/threonine-protein kinase MRCK beta	Cdc42bpb	10	7.2	194.89	3.31e-50
Q80Z29;D4A8T1;G8JLR4	Nicotinamide phosphoribosyltransferase	Nampt	25	45.2	55.437	0
Q8CG45	Aflatoxin B1 aldehyde reductase member 2	Akr7a2	12	35.1	40.675	1.16e-51
Q8CHM7;F1M6X0	2-hydroxyacyl-CoA lyase 1	Hacl1	13	28.4	63.615	1.64e-208
Q8K4C0	Dimethylaniline monooxygenase [N-oxide-forming] 5	Fmo5	7	12.6	60.055	1.94e-54
Q8R491;Q8R3Z7	EH domain-containing protein 3	Ehd3	10	28.2	60.79	9e-236
Q8SEZ5;P00406	Cytochrome c oxidase subunit 2	Mt-co2;Mtco2	4	19.4	25.928	8.85e-16
Q8VBU2;Q8VBU2-2	Protein NDRG2	Ndrg2	9	38.8	40.779	8.51e-171
Q8VID1	Dehydrogenase/reductase SDR family member 4	Dhrs4	3	8.2	29.821	1.14e-05
Q8VIF7;F1LRJ9	Selenium-binding protein 1	Selenbp1	17	48.5	52.531	3.3e-100
Q91XR8;F8WFK6;P36970;P36970-2	Phospholipid hydroperoxide glutathione peroxidase, nuclear;Glutathione peroxidase;Phospholipid hydroperoxide glutathione peroxidase, mitochondrial	Gpx4	3	16.2	29.352	4.92e-13
Q920J4;D3ZW98	Thioredoxin-like protein 1	Txnl1	7	38.1	32.249	1.79e-105
Q920P0	L-xylulose reductase	Dcxr	7	35.2	25.719	9.5e-43
Q920R3	Fatty acid desaturase 1	Fads1	5	14.8	52.481	4.04e-19
Q923K9;Q923K9-2;F1LNL0;Q923K9-3;Q923K9-4;Q66H68;D3ZAE2	APOBEC1 complementation factor	A1cf	15	41.4	65.619	5.35e-152
Q99J82	Integrin-linked protein kinase	Ilk	13	27.7	51.373	3.39e-49
Q99MI5		Srm	3	13.9	33.997	1.91e-61
Q99ND5;P49890	Estrogen sulfotransferase, isoform 6	ste2	2	12.9	35.361	4.98e-41
Q99PD4;D4A992;D3ZXP7	Actin-related protein 2/3 complex subunit 1A	Arpc1a	9	31.1	41.599	8.92e-75
Q9EPH8;B5DF80;G3V9N0;D3ZSR2;D4AC14;D4A233;F1M8Y9	Polyadenylate-binding protein 1	Pabpc1;Pabpc3	3	6.6	70.7	4.43e-33
Q9EPJ0	Nuclear ubiquitous casein and cyclin-dependent kinases substrate	Nucks1	3	5.3	27.14	2.05e-09
Q9EPX0	Heat shock protein beta-8	Hspb8	6	33.2	21.592	9.81e-20
Q9EQ76;Q8K4B7;G3V6F2	Dimethylaniline monooxygenase [N-oxide-forming] 3	Fmo3	16	29.8	59.96	2.23e-61
Q9ES38	Bile acyl-CoA synthetase	Slc27a5	20	27.5	76.265	8.14e-196
Q9JHL4;Q9JHL4-2;Q9JHL4-3;Q9JHL4-4	Drebrin-like protein	Dbnl	8	26.4	48.612	2.15e-155
Q9JJ19	Na(+)/H(+) exchange regulatory cofactor NHE-RF1	Slc9a3r1	8	28.9	38.83	1.43e-32
Q9JKB7;Q9WTT6	Guanine deaminase	Gda	14	37.9	50.9	6.3e-192
Q9QUH3	Apolipoprotein A-V	Apoa5	6	28.1	41.426	3.67e-87
Q9QXQ0;Q8R4I6;D3ZCV0	Alpha-actinin-4	Actn4	23	34.7	104.91	0
Q9QYU4	Thiomorpholine-carboxylate dehydrogenase	Crym	7	25.9	33.554	1.03e-58
Q9QZA2;F1LLY4	Programmed cell death 6-interacting protein	Pdcd6ip	24	32.6	96.63	6.91e-135
Q9QZU7	Gamma-butyrobetaine dioxygenase	Bbox1	6	14	44.545	8.17e-20
Q9R063;D3ZEN5;Q9R063-2	Peroxiredoxin-5, mitochondrial	Prdx5	6	35.7	22.178	4.98e-11
Q9R0T3	DnaJ homolog subfamily C member 3	Dnajc3	7	16.5	57.56	1.98e-25
Q9WU49	Calcium-regulated heat stable protein 1	Carhsp1	4	59.9	15.906	3.23e-26
Q9WU74;Q9WU74-2;Q9WU74-3	Lipolysis-stimulated lipoprotein receptor	Lsr	5	11.8	65.776	2.08e-20
Q9WU82	Catenin beta-1	Ctnnb1	6	12	85.454	4.57e-35
Q9WUC4	Copper transport protein ATOX1	Atox1	2	32.4	7.2924	2.15e-12
Q9WVJ6		Tgm2	24	37.2	76.934	5.08e-259
Q9WVK3	Peroxisomal trans-2-enoyl-CoA reductase	Pecr	8	36.3	32.433	4.73e-51
Q9WVK7	Hydroxyacyl-coenzyme A dehydrogenase, mitochondrial	Hadh	5	11.8	34.447	6.25e-08
Q9Z122;F1LNU6	Fatty acid desaturase 2	Fads2	6	17.3	52.38	8.62e-19
Q9Z270;Q9Z269	Vesicle-associated membrane protein-associated protein A	Vapa	5	20.9	27.841	3.74e-14
Q9Z2L0;D3Z9A9;F1LV63	Voltage-dependent anion-selective channel protein 1	Vdac1	5	23.3	30.755	2.62e-11
Q9Z2M4	Peroxisomal 2,4-dienoyl-CoA reductase	Decr2	4	10.6	31.292	1.81e-48
Q9Z339;Q6AXR6;D3ZJM9;Q6AXV9	Glutathione S-transferase omega-1	Gsto1	8	35.7	27.669	5.88e-71

## Sheet: HFD
Protein.IDs	Protein.names.HFDB	Gene.names	Unique.Peptides	Unique.Sequence.Coverage	Molecular.Weight.kDa	PEP
B0BMS8;Q64122	Myosin regulatory light polypeptide 9	Myl9	4	21.5	19.854	1.43e-212
B0BMW0;P61107	Ras-related protein Rab-14	Rab14	4	31.6	23.897	2.08e-53
B0BMY6		LOC100362554	3	8.8	40.447	6.58e-12
B0BN52;D3ZNM9;F1M3F5		Mtch2	3	10.6	33.528	2.42e-05
B0BN81;P24050	40S ribosomal protein S5;40S ribosomal protein S5, N-terminally processed	Rps5	12	49.5	22.906	9.17e-85
B0BN93	26S proteasome non-ATPase regulatory subunit 13	Psmd13	12	38	42.817	2.88e-103
B0BNA7;F1LR46;F1LUP5	Eukaryotic translation initiation factor 3 subunit I	Eif3i	7	20.9	36.46	1.13e-27
B0BNE5	S-formylglutathione hydrolase	Esd	5	15.2	31.363	1.38e-17
B0BNF9		Hao1	8	27.6	40.968	1e-50
B0K031;P05426;F1M6K0;F1M087;D4A1F7;Q7TP62;D4A4I8;F1LTQ3;F1M1V2;F1LXU1;F1LUE9;F1LWQ5;F1LV62	60S ribosomal protein L7	Rpl7	27	60.4	30.313	2.08e-153
B1H241;Q80ZG1	Synembryn-A	Ric8a	5	14.5	59.826	6.33e-73
B1H267	Sorting nexin-5	Snx5	4	14.1	46.793	6.51e-39
B1WBY7		Erlin1	2	7.5	39.266	1.58e-24
B1WC26		Nans	4	17.5	40.051	9.58e-42
B2GUY2;D4A1F1	Transferrin receptor protein 2	Tfr2	5	6.5	88.327	1.81e-16
B2GUZ5;F8WFI5	F-actin-capping protein subunit alpha-1	Capza1	7	36.4	32.909	1.1e-115
B2GV15		Dbt	10	17.8	53.273	8.46e-37
B2GV24;D3ZK82	E3 UFM1-protein ligase 1	Ufl1	5	8.6	89.584	3.33e-40
B2GV38	Ubiquitin-like protein 4A	Ubl4a	7	47.8	17.79	2.4e-30
B2RYG6	Ubiquitin thioesterase OTUB1	Otub1	2	12.5	31.27	1.89e-50
B2RYH2;D3ZBI1		Trim14	7	17.3	49.849	3.75e-26
B2RYI0	WD repeat-containing protein 91	Wdr91	5	8.8	83.145	1.91e-20
B2RYI2;D3ZVL3		Srp68	13	30.9	70.491	2.32e-177
B2RYJ3;D3ZK73;D3ZK74;D3ZNZ7;D3ZL69		RGD1563853	7	12.5	87.773	1.25e-105
B2RYN3		Eef1e1	3	19.5	19.842	1.73e-32
B2RYP4		Snx2	4	8.5	58.53	1.38e-19
B2RZ72		Arpc4	7	48.8	19.667	3.98e-60
B2RZA9;F1LTT5		Ube2l3	4	42.2	17.861	2.32e-109
B2RZD1		Sec61b	2	27.1	9.9884	1.6e-26
B2RZD4;D4A4W9;F1LQ14;P11250;D3ZHM1	60S ribosomal protein L34	Rpl34;Rpl34-ps1;RGD1561086	7	33.3	13.293	4.41e-20
B2RZD6		Ndufa4	5	47.6	9.3267	1.37e-16
B3DMA2;F1LYZ0	Acyl-CoA dehydrogenase family member 11	Acad11	16	20.2	87.37	8.62e-63
B5DEG8;F1LYY0;F1M7Y8		Sec24c	9	12.7	118.52	3.83e-52
B5DEM5;F1LSW7;Q63507;Q6TUH8;D3ZHE6;D3ZZY6	60S ribosomal protein L14	Rpl14;LOC306079;LOC680579	10	39.7	23.78	1.96e-43
B5DEN5;Q7TPK5		Eef1b2	3	16	24.675	3.79e-34
B5DF46		Pmm2	8	34.7	27.708	3.08e-29
B5DF60;Q6VV72	Eukaryotic translation initiation factor 1A	Eif1ax;Eif1a	2	15.3	16.46	1.7e-12
B5DF65		LOC681468	4	25.2	22.094	3.67e-11
B5DFC3		Sec23a	13	24.1	86.161	0
B5DFC8;D3ZX16	Eukaryotic translation initiation factor 3 subunit C	Eif3c	10	12.4	105.43	7.7e-140
B5DFK6		Ap3d1	2	1.8	135.67	1.22e-14
D3Z8I7		Gstt1	8	25.2	23.381	9.16e-207
D3Z8X6		Dtx3l	19	27.9	83.102	1.07e-125
D3Z905;G3V699;Q9Z2Q1;D4A5M5;Q9Z2Q1-2;D4ADQ9;D3Z9R0	Protein transport protein Sec31A	Sec31a	30	29.1	133.43	0
D3Z941		Mars	19	27.1	101.58	5.37e-124
D3Z982;Q6PDU1;F1LUT2	Serine/arginine-rich splicing factor 2	Srsf2	7	26.6	28.869	1.1e-137
D3Z9E1;D4A9Z4		Emilin1	6	11.3	94.504	2.37e-23
D3Z9J5;Q6AY86	Vacuolar protein sorting-associated protein 26A	Vps26a	7	33.1	41.534	3.29e-144
D3Z9M4;F1M651;F1M3K5;F1MA94;D3ZMF0;D3Z9Z0		Ank1	7	6	207.49	3.86e-55
D3ZAF6		Atp5j2	3	34.1	10.452	1.53e-07
D3ZAP2;C0JPT7;D3ZXX2		Flna	38	19.8	281.29	0
D3ZBA1;D3ZJP8;E9PSW4;E9PTJ9		Aox4	32	29.7	146.93	0
D3ZBW0;D4A2X2;Q05096;F1LSW1;D3ZC71;Q05096-2;D3ZNP7;Q05096-3	Unconventional myosin-Ib	Myo1b	20	21.3	132.02	5e-169
D3ZC88;P62630;F1M6C2;P62632;D3ZA96;D4A0X4	Elongation factor 1-alpha;Elongation factor 1-alpha 1	LOC100360413;Eef1a1	19	42.6	50.107	0
D3ZCS9		RGD1309350	5	34	16.01	1.69e-28
D3ZD13;D4A8D5;D3ZHA0;D3ZZ63		Flnb	61	32.1	277.84	0
D3ZD23		Abce1	7	17	67.3	8.08e-32
D3ZDW1;D3ZIC2		Uroc1	15	22.4	78.533	1.3e-96
D3ZE37;P62282;D3ZYK5;D3ZMX7	40S ribosomal protein S11	Rps11	16	60.6	18.701	7.46e-90
D3ZE63;P30904;D4A3P7;F1LTZ6	Macrophage migration inhibitory factor	LOC686548;Mif;RGD1560513	3	23.5	12.605	1.94e-14
D3ZF07;P18445;D3ZI60;D3ZG03;D4AAY6;D3ZUK0;F1M5H4;F1LVD0;D3ZVI3;F1LZW1	60S ribosomal protein L27a	RGD1562402;Rpl27a;RGD1561984	6	32.4	16.587	1.23e-25
D3ZF26		Tnks1bp1	16	14.5	180.01	3.95e-231
D3ZFA8;P04644;D3ZHU9;D3ZKG6;D3ZM01;F1M5B1;F1M238;D3ZL23	40S ribosomal protein S17	LOC100362366;Rps17;LOC100361180;RGD1559955	10	65.2	15.468	2.47e-144
D3ZFB2;D4A371		Luc7l3	4	6.7	58.423	5.38e-12
D3ZFF9;D3ZUL6;G3V9U0;D3ZQ17		Acss2	7	12.3	80.583	6.22e-92
D3ZFJ2			2	4.7	39.661	6.04e-28
D3ZFJ6		Lactb	5	11.6	60.42	5.21e-22
D3ZFX4;B2RYN0;D3ZU02		Pgm3	9	20.7	60.845	7.02e-76
D3ZFY0		Sephs1	6	28.3	42.892	1.52e-35
D3ZG88		Sssca1	2	17.6	21.318	8.6e-20
D3ZGE6;D3ZRB0;Q66HL2		Cttn	18	39.7	61.077	1.77e-108
D3ZHV7		Sdsl	4	23.8	26.209	5.74e-21
D3ZHX7;D3Z8U7;F1LQB5;Q5M7W5;D3ZHY7;D3ZHX8;Q5M7W5-2	Microtubule-associated protein;Microtubule-associated protein 4	Map4	6	7.9	116.81	5.59e-33
D3ZHY1;Q5XHY5;D4ABM0;Q68FW7;F1LQP2;D3Z7Y7	Threonine--tRNA ligase, cytoplasmic	Tars	24	33	83.388	2.42e-299
D3ZI23;G3V9P0;Q9WTV5;D4A4H7	26S proteasome non-ATPase regulatory subunit 9	Psmd9	5	18	31.758	7.18e-21
D3ZIA3;F1LN56;Q99MZ8	LIM and SH3 domain protein 1	Lasp1	13	41.8	29.942	5.75e-111
D3ZIN5		RGD1308772	4	3.4	213.76	6.62e-10
D3ZJ95;Q7TQ70;P06399;P06399-2;F1M5M0	Fibrinogen alpha chain;Fibrinopeptide A;Fibrinogen alpha chain	Fga	32	39.2	86.846	0
D3ZJS0;P70580	Membrane-associated progesterone receptor component 1	Pgrmc1	8	28.4	24.694	1.59e-113
D3ZK05		Gsdmd	9	24.4	49.603	2.39e-70
D3ZK97;D3ZQN4;P84245;D3ZJ08;Q6LED0;D4A0P4;D3ZVW5;F1M7I7	Histone H3;Histone H3.3;Histone H3.1	LOC100360868;LOC100359421;H3f3b;Hist1h2ail;LOC691496	7	43.4	15.358	1.57e-16
D3ZKG9;F1M0Y0		RGD1307222	13	10.5	151.04	7.72e-152
D3ZL58;Q5XIT4		Nub1	4	10.3	70.296	1.85e-71
D3ZLI8;Q07984	Translocon-associated protein subunit delta	Ssr4	4	30.5	19.107	1.58e-13
D3ZLM5		Nhlrc2	9	20.8	78.561	4.42e-115
D3ZLR7;D4ADT6;D4A8D9;D4ADT5		Ddx58	28	31	106.3	4.69e-173
D3ZNH4;F1LS18;D3ZWM5;G3V8B3;D4A817;Q00715;D4ABS3;D3ZLY9;D3Z8U0;G3V9C7;Q00729;F1LP73;D3ZNZ9;D3ZZP9	Histone H2B;Histone H2B type 1;Histone H2B type 1-A	Hist1h2bm;Hist1h2bl;LOC684647;LOC684797;LOC100359692;Hist1h2bd;Hist1h2bf;Hist1h2bc;Hist1h2ba;Hist3h2ba	12	58.7	15.493	3.16e-116
D3ZNQ6		Ube2m	2	10.4	20.9	4.13e-07
D3ZNU8;D4A678;Q6XDA1;REV__F1LLV5		Spta1	108	47.2	280.13	0
D3ZP30;F1LQI5;Q2TL32;D3ZZA2	E3 ubiquitin-protein ligase UBR4	Ubr4	13	3.3	575.56	1.59e-161
D3ZPN7;Q6PDW2;D4A4G9;D3ZMI8;D3ZXP5;D3ZZH9;D3Z9G3;D3ZEK2;D3ZUH0;D3ZEP1;P20280;F1LWH4;D4A7B4;D4A870;D3ZPH0;D3ZRA9;D3ZLH3;D4A219;D4A4G7;D3ZPU6;F1LY43;F1LVT4;D3ZE97;D3ZPV5;F1LV87;F1LXP6;D3ZIM9;F1LV39;D3ZKL4;D4A4U4;F1M5C7;D4A9T8;D3ZPB0;D3ZQD7;F1M361;F1M235;D3ZF08;D4A5A5;D3ZCN5;D3ZVH3;D3ZM68;F1M4U3;D3ZNN2	60S ribosomal protein L21	LOC100364176;LOC100360604;RGD1561815;RGD1562839;RGD1562469;LOC681195;LOC100361103;RGD1562923;LOC100363471;RGD1562971;Rpl21;LOC100360611;LOC686080;RGD1565370;RGD1560414;RGD1562601;RGD1565159;RGD1566270;LOC680639;RGD1564634;RGD1566326;RGD1562929	4	23.1	18.678	7.75e-86
D3ZPR0		Cse1l	9	9.5	110.21	1.98e-85
D3ZQX6;Q9EQS4		Cth	2	13.6	43.59	0
D3ZQY2			6	24	32.9	3.31e-18
D3ZR07;D3ZFD0;F1LM91;F1M5K8;F1LNC1;D3ZHN6			138	57.2	234.36	0
D3ZR68;D4AE06;D4A6E5	Peptidyl-prolyl cis-trans isomerase	Fkbp15	7	9.3	137.38	5.71e-97
D3ZRJ1;F1M7X1;P20817;D3ZNF2;D3ZMB7;D4A756;D4AB65;D3ZTC9;P24464;D3ZXY6	Cytochrome P450 4A14	Cyp4a2;Cyp4a14	3	9.9	58.465	1.31e-70
D3ZRV4;P04905;G3V983;D3ZGW4;D3ZVQ8;B0BN47	Glutathione S-transferase Mu 1	Gstm1	11	35.4	28.399	1.11e-138
D3ZS38;D4A0H4;D4AEE5		Cul2	5	7.2	86.968	7.05e-58
D3ZS68;D4A1P3;Q6AY48;D3ZPF1;F1LU04;D3ZCS3;D3ZWQ9;F1M8T3		Pcbp1	7	30.3	37.497	1.04e-223
D3ZSD1;D4A6B2;Q3KR86;D3ZDF7;F1LRP0	Mitochondrial inner membrane protein	Immt	23	33.9	87.2	1.04e-173
D3ZT90		Gcdh	7	25.7	49.713	4.96e-152
D3ZTH8;F1LT35;P62752;D4AAL7;D3ZTX9;D3ZNM1;D3ZFK7;D3ZSR8;D4A9L3;F1M1E5;D4ADV3;D3Z969;D3ZIJ2	60S ribosomal protein L23a	LOC689899;RGD1564606;Rpl23a;LOC688776;RGD1565170;RGD1562755	10	44.2	17.753	1.17e-129
D3ZTP0;REV__D4A4I9		Aldh1l2	16	21.8	101.69	3.02e-119
D3ZTT9;P61928;D3ZTX8;D4A201;D4A7Z2	Ribosomal protein L37;60S ribosomal protein L37	Rpl37-ps1;Rpl37;RGD1561310;RGD1560186	3	28.9	11.115	7.68e-08
D3ZU13;D4AD15		Eif4g1;LOC680559	9	6.4	175.7	2.91e-33
D3ZU22;P62425;F2Z3S2;D3ZPL5;D4A6B9;F1M2H8;D3ZJH5;D3ZWM2;F1M1M2;F1M2Q3;D4A8X2;F1M394;F1M4C7;D3ZNA3;F1M300;F1LYB8;F1LU72;F1M0S7;F1M0R8;F1M4Z6;D4A566;F1LZY4;D3ZD15;Q7TQ86;F1M465;D3ZVY2;F1LV49;D4A2J1;F1LT34;D4A479;D4A1S7;F1M3Q8;F1M843;F1LXH6;F1M289;D4AE05;D3ZEB2	60S ribosomal protein L7a	LOC100361311;Rpl7a;RGD1562953;LOC680161;RGD1562409;RGD1559149;RGD1563220;RGD1564370	14	34.6	30.011	1.32e-160
D3ZU44;D4A644;D3ZAY9		Map7d1	2	3.8	93.601	1.74e-18
D3ZUM0;Q01579		Gstt1	12	47.3	27.598	1.3e-206
D3ZUT7;Q63186	Translation initiation factor eIF-2B subunit delta	Eif2b4	2	5	59.869	5.21e-12
D3ZUU8		Sec14l4	7	20.4	47.018	1.9e-36
D3ZUX1		Agphd1	2	8.5	42.475	1.15e-12
D3ZUX5		Chchd3	6	27.8	26.434	2.39e-26
D3ZUY6;F1LM69;Q641Y0;D4AB95	Dolichyl-diphosphooligosaccharide--protein glycosyltransferase 48 kDa subunit	Ddost	4	9.5	48.555	2.16e-09
D3ZUY8;D3ZMB9		Ap2a1	4	5.2	107.67	2.64e-42
D3ZV82		LOC685067	6	13.1	71.252	1.37e-73
D3ZV91		RGD1305721	4	15.3	37.914	2.8e-14
D3ZVK7;D3ZZ29;G3V9C0;P0C169;P0C170;Q00728;Q4FZT6;Q64598;Q6I8Q6;A9UMV8;D3ZXP3;D3ZWE0	Histone H2A;Histone H2A type 1-C;Histone H2A type 1-E;Histone H2A type 4;Histone H2A type 3;Histone H2A type 1-F;Histone H2A.J	Hist1h2ak;LOC680322;Hist1h2ai;Hist1h2af;H2afj;H2afx	2	13.8	14.149	5.72e-98
D3ZVQ0	Ubiquitin carboxyl-terminal hydrolase	Usp5	3	5	95.778	8.71e-12
D3ZW08		Adsl	6	21.5	54.852	8.75e-68
D3ZW50;Q63448;F1M9A7;D4A3R1;REV__F1LW22;REV__F1M8V4	Acyl-coenzyme A oxidase;Peroxisomal acyl-coenzyme A oxidase 3	Acox3	18	32.3	78.569	2.93e-277
D3ZW55	Inosine triphosphate pyrophosphatase	Itpa	5	24.2	21.927	1.56e-20
D3ZW96;E9PTI1		Atp6v1h	4	12.2	55.868	3.41e-45
D3ZX68;E9PTF9;F8WG38		Wasf2	3	13.2	34.236	5.99e-34
D3ZXH6;P24049;D3ZP66;D3Z9G9;D4AAE8;D4ACF0;Q7TPJ7;F1M302;F1LZX7;F1M5Y4	60S ribosomal protein L17	RGD1563903;Rpl17;RGD1562905;RGD1560017;RGD1565093	16	47.6	22.025	0
D3ZXY4		Aldh8a1	23	45.8	53.46	0
D3ZYU9;G3V9S9;D3ZTC8		Sec24d;Sec24d_predicted	4	5.7	113.16	5.09e-26
D3ZZ12;B5DFH4;F1M318		Papss2	34	44.9	69.956	0
D3ZZ45			2	7.1	13.138	6.05e-05
D3ZZ55;D3ZZZ9;D4A493;D4ABK8		Ctnnd1	6	9.8	104.89	1.13e-25
D3ZZ95;P39032;D4A1Q0;F1M706;D3ZJJ6;D3Z7Z2;D3Z8V5;F1M9S4	60S ribosomal protein L36	LOC100361060;Rpl36;LOC100361079;LOC100360439;LOC100359616	7	39.6	12.41	2.33e-48
D3ZZB2;D3ZS45		Pex1	14	16.1	141.4	3.25e-171
D3ZZK1;P60868	40S ribosomal protein S20	LOC100359563;Rps20	7	37.8	13.354	8.39e-245
D3ZZN4;P04646;D3ZRV7;D4A771;F1M2L1;D4A329;D3ZYY1;F1M0T2;D3ZFY4	60S ribosomal protein L35a	LOC100362338;Rpl35a;LOC100359636;LOC100359825;RGD1560900	9	49.1	12.623	2.2e-27
D3ZZU0;P85970	Actin-related protein 2/3 complex subunit 2	Arpc2	9	30	34.347	3.89e-47
D4A133		Atp6v1a	10	25	68.264	6.51e-160
D4A137;D3ZIM4;D3ZJP0;G3V9W6;P30839;D4A387;P11883	Aldehyde dehydrogenase;Fatty aldehyde dehydrogenase	Aldh3a2	18	42.6	56.842	1.75e-203
D4A1J6		Ankfy1	2	4.1	128.56	8.3e-28
D4A1Y4;D4A5T0;Q5XI21		Tom1	5	15.9	56.708	8.06e-24
D4A2K1		Hoga1	5	23.4	34.464	6.22e-74
D4A2W9;D3Z898;D3ZA81		Samhd1	3	5.6	71.702	7.44e-34
D4A323;Q6S3A0;F1MAL6;D3ZF79;Q6S396;Q6S395;Q6S398;Q6S3A3;Q6S3A1;P30427;P30427-4;P30427-2;P30427-3	Plectin	Plec	108	27.8	534.37	0
D4A354;D3ZCI0;D3ZNG1;F1LSY6;Q63060;D3Z8F7;Q68FP7	Glycerol kinase	Gk	15	28.4	61.232	1.6e-109
D4A3R9;Q6AYK1;F1M3H5;F1M6U2	RNA-binding protein with serine-rich domain 1	Rnps1;LOC688526	2	6.4	39.683	7.3e-05
D4A478		Ntpcr	3	28.1	20.813	3.52e-37
D4A4D5;P02401;D3ZN03;D3ZMC4;D3ZMC5	60S acidic ribosomal protein P2	LOC498555;Rplp2;LOC100362751	8	81.7	11.706	6.35e-266
D4A4X4;F1M434		Cgn	24	25.3	136.4	0
D4A5I9;D3ZYX5;F1LWP6		Myo6	22	20	145.66	2.02e-154
D4A6S1;E9PSJ6;F1M668;F1M005		Grhpr	13	31.5	36.219	5.17e-68
D4A720;D3Z964;F1LZA3;F1M8R2		rCG_61762	6	25.6	27.377	9.75e-38
D4A746		Gmppb	5	19.7	39.902	4.21e-26
D4A7R0;B0BND9			7	15.9	75.002	1.33e-113
D4A8A0		Cad	13	8.8	243.47	6.72e-173
D4A8E3;Q3MID3	ADP-ribosylation factor GTPase-activating protein 2	Arfgap2	7	15.9	58.067	1.21e-25
D4A8H8;D4A524;D3Z8C3;D3ZX82		Cyfip1;Cyfip2	2	1.8	145.26	1.33e-12
D4A8Z9		Selo	4	8.7	74.06	1.76e-71
D4A996;F1LRB4;D4ADD2;F1LXD4;D3ZM20		Kif13b	19	14.8	203.26	2.04e-205
D4A9A6;D4A2Q2;D3ZEZ7;D3ZIP3;D3ZKF7;D4A6Q4;D3ZHS9;D3ZL97;D3ZL93;D3ZMI4;Q9WTP0-2;Q9JMB3;D3ZU77;G3V874;D3ZB32;D3ZDI1;Q9WTP0;D4ACZ3;A3E0T0;D4A9L5;D4ACZ4;D3ZLZ8;D3ZC10		Epb4.1	26	33.2	91.979	2.23e-107
D4A9I9;F1LRY5;Q64380;D4A8Z7	Sarcosine dehydrogenase, mitochondrial	Sardh	5	5.7	101.66	5.69e-14
D4A9J5;D3ZD86;D3ZHV2;D3ZPQ6;D3ZPQ5;D3ZHK1	Microtubule-actin cross-linking factor 1	Macf1	9	1.8	831.16	2.32e-60
D4A9L2		Srsf1	10	37.1	27.744	1.88e-45
D4AA63		Ubqln2	4	8.2	67.259	0
D4AAG1;P36972	Adenine phosphoribosyltransferase	Aprt	2	12.6	19.764	7.3e-06
D4AAV1		Amdhd1	12	31.3	46.57	5.99e-48
D4AB03		Fam120a	13	17.7	121.74	1.51e-236
D4AC23		Cct7	15	27.2	59.658	1.64e-83
D4AC36		Eif3f	4	22.2	37.997	1.63e-45
D4ACB7;D3ZN76		LOC100360302	18	14.8	255.56	5.84e-233
D4ACB8		Cct8	13	28.1	59.588	1.63e-88
D4ACG2;D4A2Z4;D3Z9T1		Ilvbl	4	10	72.269	2.07e-46
D4ACJ1;P62850;D4A6H5;P62850-3;P62850-2;D3ZFZ8	40S ribosomal protein S24	LOC100363469;Rps24	6	36.1	15.395	2.39e-41
D4ACL3;G3V6S2;Q63270;Q62751	Cytoplasmic aconitate hydratase	Aco1	40	53.3	98.956	0
D4AD25;F1M779;P11442	Clathrin heavy chain 1	Cltc	54	35.9	192.02	0
D4ADE8;D3ZN21;Q64060;F1LQD1;D4ADV9		Ddx3x;RGD1309586	27	41.1	73.145	8.74e-195
D4ADJ6;REV__D3ZP58;REV__D3ZJB5;REV__D4A6F9;REV__D3ZMQ0		Amfr	11	23.5	72.271	4.98e-34
D4ADW8;G3V960;P10868	Guanidinoacetate N-methyltransferase	Gamt	5	25.6	28.188	2.96e-38
D4AE02;D4A063		RGD1560464	3	7.9	45.041	8.46e-31
D4AEH3		Psmd7	8	37.8	36.491	1.4e-249
D4AEH9		Agl	29	20.8	174.33	2.49e-174
D4AEP0	Adenylosuccinate synthetase	Adss	4	12.3	50.085	3.08e-25
E2RUH2;P29315	Ribonuclease inhibitor	LOC100360501;Rnh1	5	12.5	49.919	1.32e-18
E9PSQ0;D3ZBE2;D3ZBE4		Acacb	3	2	274.67	9.81e-112
E9PSR5;D4A9N5		Trim25	10	19.8	71.089	1.55e-70
E9PT29			5	11.4	72.827	2.66e-56
E9PT65;D4A5L5			11	19.8	68.39	2.5e-112
E9PT85;Q6AZ64		Xrcc6	3	7.1	69.588	3.27e-11
E9PTL2;P12711;G3V7J9;P41682	Alcohol dehydrogenase class-3	Adh5	21	24.2	94.619	1.25e-248
E9PTU4;E9PTI3;F1M7T3;D4A0G3;Q63862-3;Q63862;Q63862-2	Myosin-11	Myh11	88	38.4	223.8	0
E9PU16;F1M225;Q6NYB7;D3ZQP3;D3ZQP7;D3Z848;P35280;P70550;D4A8V5;P35289;P35286;P35281;D3ZGA3	Ras-related protein Rab-1A	Rab1;Rab1A	2	7	33.696	2.1e-13
E9PU64;D4A2G2		Scin	3	4.5	80.142	2e-15
F1LM19;P24090;Q7TP75	Alpha-2-HS-glycoprotein	Ahsg	3	14.8	38.167	6.72e-85
F1LM22;P08542;P19488;F1M7N8;F1M3E3	UDP-glucuronosyltransferase 2B17;UDP-glucuronosyltransferase 2B37	Ugt2b17;Ugt2b37;LOC100361864	4	8.5	60.477	1.69e-35
F1LM41;Q62667	Major vault protein	Mvp	24	33.2	96.692	8.03e-122
F1LM47;F1M6A4		Sucla2	5	9.9	50.306	3.23e-16
F1LM55		RGD1309922	6	8.1	102.79	9.68e-42
F1LMD9;P97874;D3ZNM5	Cyclin-G-associated kinase	Gak	4	5.1	143.71	4.79e-30
F1LMG2;Q68FT5	Betaine--homocysteine S-methyltransferase 2	Bhmt2	8	27	39.799	1.06e-76
F1LMI4;P36506;D4A1X1	Dual specificity mitogen-activated protein kinase kinase 2	Map2k2	6	21.2	44.38	9.77e-244
F1LMJ9;Q6TXE9		Eprs	64	43.9	169.86	0
F1LMN4;P12938	Cytochrome P450 2D3	Cyp2d3	4	12.1	57.028	6.75e-147
F1LMP2;P12346;P12346-2;Q4FZX7;F1MAG6	Serotransferrin	Tf	9	9.8	107.41	1.5e-25
F1LMV6		Dsp	52	18.7	332.39	9.51e-253
F1LMW6		Psmd14	5	24.8	32.924	6.46e-81
F1LMZ8;D3Z950		Psmd11	17	38.4	54.019	1.88e-145
F1LN66;D3ZEC3;P70712	Kynureninase	Kynu	2	5.8	52.45	2.41e-05
F1LNF0;F1LMN2		Myh14	88	47.4	228.91	0
F1LNF1;F1LM82;A7VJC2;A7VJC2-2;A7VJC2-4;A7VJC2-3;D4A1X0	Heterogeneous nuclear ribonucleoproteins A2/B1	Hnrnpa2b1	4	13.6	37.297	3.38e-15
F1LNU4;F1LSA1;F1LPU7;F1LRI1;D3ZGF1;D3Z9C5;F1LLV8;F1LLZ9;D4A4R6;D4A7E6;P26051;P26051-2	CD44 antigen	Cd44	2	2.7	85.731	1.07e-06
F1LNW3;P97562	Acyl-coenzyme A oxidase;Peroxisomal acyl-coenzyme A oxidase 2	Acox2	32	53.5	76.746	0
F1LP08;Q5PQJ6	Pyrroline-5-carboxylate reductase 3	Pycrl	6	24.1	28.864	3.47e-44
F1LP72;Q68FR9-2;Q68FR9;G3V9D9;G3V732;F8WG86	Elongation factor 1-delta	Eef1d	9	16.9	72.269	6.68e-109
F1LP75;F1M7H9		Luc7l2	14	27.1	40.774	1.75e-232
F1LPA0		RGD1562301	5	25.7	38.822	4.2e-36
F1LPB3;D3ZW20;O88813	Long-chain-fatty-acid--CoA ligase 5	Acsl5	13	21.6	76.871	4.99e-138
F1LPF6;P11507;E9PSY3;D3ZJN5;E9PSX6;P11507-2;Q64578;P18596;D3ZBM5;D3ZHJ6;G3V9U7;P18596-2	Sarcoplasmic/endoplasmic reticulum calcium ATPase 2	Atp2a2	13	14.3	114.81	1.77e-168
F1LPK7;Q63598;D3ZRK9	Plastin-3	Pls3	11	22.5	70.998	4.43e-133
F1LPV0;F1LML0		Nars	7	20.6	64.198	2.45e-45
F1LPV8;F1M3K0		Suclg2	4	24	30.321	1.75e-85
F1LQ02;F1LMQ5;G3V9Y1;Q9JLT0	Myosin-10	Myh10	56	34.8	233.61	0
F1LQ09;D4A042		Atl2	4	8.7	66.194	7.95e-28
F1LQ81;Q9QUL6	Vesicle-fusing ATPase	Nsf	7	11.4	82.643	1.86e-53
F1LQ84;F1LQ23		Ugp2	12	26.6	56.838	6.22e-74
F1LQC0		Lars	10	11.6	134.41	2.79e-93
F1LQF5;Q3KR85		Ubac2	5	17.7	38.936	1.34e-11
F1LQK1;P05183;P04800;Q06884	Cytochrome P450 3A2;Cytochrome P450 3A1	Cyp3a2;Cyp3a1;Cyp3a73	5	11.3	57.795	4.3e-25
F1LQL3;P62718;F1M0K6	60S ribosomal protein L18a	Rpl18a;RGD1565566	11	39.8	22.319	4.45e-74
F1LQM9;D3ZBB4			6	6	124.03	4.64e-19
F1LQQ6		Pls1	6	11	70.389	3.76e-59
F1LQS3;P21533;D3ZTF3;F1M2R6;F1LVJ5;F1M2L7;F1M4J7	60S ribosomal protein L6	Rpl6	15	41.9	33.545	2.38e-218
F1LR41;G8JLS6;O08590	Amine oxidase;Membrane primary amine oxidase	G6pc;Aoc3	2	1.7	173	2.59e-08
F1LR47;P05178;D4A253;D4A820	Cytochrome P450 2C6	Cyp2c6v2;Cyp2c6	9	18.4	55.994	6.17e-52
F1LR89;O88656	Actin-related protein 2/3 complex subunit 1B	Arpc1b	8	21.5	41.477	2.35e-26
F1LRA1;Q62902	Protein ERGIC-53	Lman1	4	6.8	57.819	1.87e-08
F1LRA3;Q4V7C7;F1LRK8;F1LY09;D3ZHM0	Actin-related protein 3	Actr3	16	40.9	47.285	4.59e-113
F1LRD5;P41562	Isocitrate dehydrogenase [NADP];Isocitrate dehydrogenase [NADP] cytoplasmic	Idh1	28	61	47.462	3.61e-258
F1LRH5;A0FKI7-3;A0FKI7;A0FKI7-2	Acyl-CoA-binding domain-containing protein 5	Acbd5	4	9	57.554	9.18e-16
F1LRI5		Gcn1l1	22	11.9	293.17	3.09e-179
F1LRJ2		Srrm2	3	2	295.88	3.1e-12
F1LRL8		Arpc3	4	24.3	20.435	3.27e-13
F1LRR8;Q4V8K1;Q7TP88	Metalloreductase STEAP4	Steap4	5	15.5	52.674	1.17e-32
F1LRT9		Dync1h1	3	1	416.86	0
F1LS48;Q5XI22;D3ZKB6;F1LWW4	Acetyl-CoA acetyltransferase, cytosolic	Acat3;Acat2	9	20.8	69.82	4.58e-146
F1LS86		Iars	15	16.9	144.44	4.15e-180
F1LSB9;Q5XI07;F1LXI2;D4ADL3;D3ZBA0	Lipoma-preferred partner homolog	Lpp	7	15	68.389	4.18e-38
F1LSR9;P06757	Alcohol dehydrogenase 1	Adh1	23	53.2	39.994	0
F1LT36;P63326;D3ZH53;D3ZJY5;D3ZEN7;F8WFG4;D4A3Z5;D3ZCN9;D4A3Z6;Q7TP86	40S ribosomal protein S10	Rps10;RGD1561871;LOC100360905;LOC100363439	4	19	19.634	4.67e-20
F1LT49		Lrrc47	4	9.6	63.629	1.87e-30
F1LUV9;P13596;F1LNY3;F1LTE5;F1MA96	Neural cell adhesion molecule 1	Ncam1	3	2.3	118.58	7.24e-07
F1LW74;D3ZCS4		LOC100360623	32	32.1	103.57	0
F1LX65;F1LXC8;F1LXC9			5	9.1	93.739	8.12e-192
F1LXC6			3	8.2	45.272	8.84e-92
F1LYK7		Cfl2	5	39.4	18.578	7.13e-170
F1LYQ5			10	23.8	61.437	7.41e-139
F1LZ05			5	13	65.403	1.39e-87
F1LZ34		Mat1a	3	10.8	23.534	0
F1LZW6;F1LX07		Slc25a13	19	33.3	74.382	1.66e-73
F1M127;F1M5T6;F1M124;F1LX32			7	7.8	130.51	2.09e-43
F1M1H0			4	18.2	34.054	1.57e-29
F1M1W1;O70490		Bucs1	8	44.6	29.745	3.05e-99
F1M3D3;F1LV13;Q62826;Q62826-2;F1LSJ5;Q9WV78	Heterogeneous nuclear ribonucleoprotein M	Hnrnpm	12	19.2	77.629	2.28e-37
F1M4S5;P83883;F1LWX1;F1M8T2;F8WFR5;D3ZDE0;D4A655	60S ribosomal protein L36a	RGD1563431;Rpl36a	8	30.2	12.278	2.56e-62
F1M510;P45592;F1M3P7	Cofilin-1	Cfl1	3	14.2	24.457	9e-188
F1M5L7			8	47.1	19.882	1.39e-104
F1M5X1;F1M853		Rrbp1	31	28.3	143.41	0
F1M5Z4;P25235;G8JLR0;D4A8V6	Dolichyl-diphosphooligosaccharide--protein glycosyltransferase subunit 2	Rpn2	7	17.7	71.783	2.48e-197
F1M775;D4A0X2;D4AE89		Diaph1	14	14	135.39	7.77e-150
F1M784;F1LXQ8		LOC100361758	13	23.8	74.673	1.25e-124
F1M953;P48721	Stress-70 protein, mitochondrial	Hspa9	16	28.9	73.744	4.17e-95
F1M9V7;D3Z8Z0		Npepps	9	13.8	103.34	2.57e-113
F1MA29;P63159;D4A9T3;D3ZCR3;D3ZXR5;D3ZA18;D3ZGW6;D4A2L7;D3ZLA7;D3ZL49;D3ZIU9;D3Z8A3;D3ZC69;F1LXZ8;F1M1H9;F1LNG6;D3ZYR6;D3ZLG3;D3ZJN6;D4A0N6;D3Z7Z9;F1M9J4;D3ZZD8;D4AEI9;F1LVZ2;D4A4X8;D3ZWY0;D3ZFH8;F1LTK2;D3ZXP6;F1LTL3;D3ZRY5;D4A5S3;F1M7I0;F1M8Z1;D3ZMK0;F1LYW8;F1M2Z0;F1M607;P52925;D3ZS25;D3ZHA8;D3ZDA5;F1LZ92;D4A160;D3ZEC1;F1M1H1;D4A6A9;F1M875;F1M4R2	High mobility group protein B1	LOC681718;Hmgb1;LOC679451;Hmgb1-ps3;Hmg1l1	11	40	24.908	9.56e-106
F1MA36;Q9QWN8	Spectrin beta chain, brain 2	Sptbn2	60	33.8	270.94	0
F1MA38;P35565	Calnexin	Canx	5	10.5	67.414	5.2e-12
F1MA64;D4A5G0;D3ZR20		Rbm39	14	24.5	59.406	2.14e-107
F1MAC0;E9PU10		Ifi47	8	26.2	47.432	5.15e-66
F1MAE2		Akr1c13	5	30.5	37.257	0
F1MAK5		Ddi2	15	39.1	44.65	1.5e-95
F1MAL3;F1LSL8		Sptb	104	52.2	267.95	0
F1MAR0		Parp9	18	32.5	92.214	2.05e-298
F2Z3Q8;P52296	Importin subunit beta-1	Kpnb1	10	14.2	97.183	1.26e-85
F2Z3T9		LOC690372	3	4.2	53.516	2.77e-09
F8WFI9;Q4G061	Eukaryotic translation initiation factor 3 subunit B	Eif3b	8	12.3	107.98	7.06e-143
F8WFR8;P51583	Multifunctional protein ADE2;Phosphoribosylaminoimidazole-succinocarboxamide synthase;Phosphoribosylaminoimidazole carboxylase	LOC100359876;Paics	4	12.9	47.122	8.09e-27
F8WFT7;P23562;Q5U329;P23562-2	Band 3 anion transport protein	Slc4a1	6	8.6	103.24	1.13e-38
F8WFW0;F1LWC2;P23358;D3ZJE2;F1M4N3;D4A8N3;F1LY34	60S ribosomal protein L12	Rpl12;Rpl12-ps1;LOC499782;RGD1563956	6	38.2	20.91	2.71e-116
F8WFW6;P62250	40S ribosomal protein S16	Rps16	15	55.2	19.156	3.4e-95
G3V6B0;F1M024;F1M5Z2;F1LTX6		Pdxdc1	11	18.7	86.97	1.39e-124
G3V6C2		Hgd	12	42.2	49.889	4.3e-152
G3V6C4;O70199	UDP-glucose 6-dehydrogenase	Ugdh	24	54.2	54.886	0
G3V6D3;P10719	ATP synthase subunit beta;ATP synthase subunit beta, mitochondrial	Atp5b	22	58	56.344	0
G3V6I4		rCG_20363	4	15.6	37.79	1.82e-81
G3V6I9;D4A1Z2;P12749;D4AE42;D3ZSF2;D3ZDV4	60S ribosomal protein L26	Rpl26;Rpl26-ps2;Rpl26-ps1	16	57.9	17.258	3.25e-108
G3V6J0;Q9JLJ3	4-trimethylaminobutyraldehyde dehydrogenase	Aldh9a1	25	43.4	56.468	0
G3V6P7;D4A1H1;D4A8U6		Myh9	22	7.8	226.41	0
G3V6P9;E9PSP2		Sptbn1	3	1.9	251.02	0
G3V6S0;F1LRX5		Sptbn1	3	2.1	274.06	0
G3V6S5;P27653;F1LW12;D3ZZM8	C-1-tetrahydrofolate synthase, cytoplasmic;Methylenetetrahydrofolate dehydrogenase;Methenyltetrahydrofolate cyclohydrolase;Formyltetrahydrofolate synthetase	Mthfd1	55	59.5	100.96	0
G3V6S8		LOC362264	6	17.1	39.025	1.55e-29
G3V6T1;D3ZFS9		Copa	37	34.5	138.36	0
G3V6T7;P38659	Protein disulfide-isomerase A4	Pdia4	8	15.6	72.747	4.26e-32
G3V6W6		LOC100365869	22	64.5	45.796	6.41e-225
G3V6X4;F1LQ82;Q62940;D4A0U5	E3 ubiquitin-protein ligase NEDD4	Nedd4	11	16.9	102.75	1.29e-109
G3V709;Q6XQN1	Nicotinate phosphoribosyltransferase	Naprt1	8	17.5	58.603	2.9e-49
G3V713;Q4KM49	Tyrosine--tRNA ligase, cytoplasmic	Yars	8	20	63.025	2.61e-98
G3V734;Q64591	2,4-dienoyl-CoA reductase, mitochondrial	Decr1	4	17.9	36.132	2.58e-13
G3V743;O88941	Mannosyl-oligosaccharide glucosidase	Mogs	6	8.9	91.961	3.93e-48
G3V798;F1LSN0		Srsf4	4	12.1	55.674	9.63e-21
G3V7A8;D4A8U7;P28023	Dynactin subunit 1	Dctn1	13	13.3	141.94	3.74e-119
G3V7C6;Q6P9T8	Tubulin beta-4B chain	Tubb4b	7	17.3	49.83	0
G3V7G8;Q5I0G4	Glycine--tRNA ligase	Gars	6	11.5	81.792	2.93e-71
G3V7G9		Eif3s6ip	15	33.2	66.71	1.99e-169
G3V7J0;Q02253	Methylmalonate-semialdehyde dehydrogenase [acylating], mitochondrial	Aldh6a1	23	47.5	57.747	2.08e-302
G3V7L6;Q63347	26S protease regulatory subunit 7	Psmc2	22	59.1	48.633	2.4e-205
G3V7N8;P97840;P97840-2;Q6P7Q6;D3Z839	Galectin-9	Lgals9	4	11.6	39.969	1.58e-73
G3V7Q7;D3ZWX0		Iqgap1	50	34.2	188.83	0
G3V7T5;Q3MIF4	Xylulose kinase	Xylb	12	26.5	59.579	4.77e-158
G3V7V6;Q8VHE9	All-trans-retinol 13,14-reductase	Retsat	3	4.9	67.477	5.82e-07
G3V7W2;P04937;P04937-3;D4AEE1;P04937-2;F1LST1;P04937-4	Fibronectin;Anastellin	Fn1	19	10.7	272.44	1.1e-163
G3V817		Xrcc5	4	6.7	83.091	1.45e-14
G3V826;P50137	Transketolase	Tkt	20	35.1	71.158	5.75e-92
G3V836;P05371;F1LSV6;E9PTR1	Clusterin;Clusterin;Clusterin beta chain;Clusterin alpha chain	Clu	5	15.9	51.42	4.59e-41
G3V852;D4A0S8;F1M4K5		Tln1	78	37.2	269.67	0
G3V888;F1LQS4;P16638;G3V9G4;P16638-2	ATP-citrate synthase	Acly	49	49	120.78	0
G3V8A5		Vps35	13	20.4	91.726	2.92e-293
G3V8C4;Q9Z0W7	Chloride intracellular channel protein 4	Clic4	3	18.2	28.669	1.78e-19
G3V8D5;P85971	6-phosphogluconolactonase	Pgls	9	38.5	30.821	7.69e-60
G3V8G2;D4A8S4		Psmd5	10	24.6	55.852	8.04e-81
G3V8I6;F1LR10;Q4KM31		Lima1	24	39.5	83.796	5.35e-202
G3V8Q8		Sec23ip	6	8.9	110.94	3.82e-66
G3V900;F1LP06;P05065	Fructose-bisphosphate aldolase;Fructose-bisphosphate aldolase A	Aldoa;Aldoal1	4	10.8	45.086	1.95e-14
G3V928		Lrp1	27	7.9	504.88	1.36e-141
G3V940;O89046	Coronin-1B	Coro1b	6	14.9	53.938	1.16e-105
G3V9A2;B2GV99;D3ZCQ5;Q64119;D4A2L0	Myosin light polypeptide 6	Myl6b;Myl6	12	87.4	16.961	0
G3V9B9;P21775;F1LPD6;P07871;D4AB84;P21775-2;D4AE53;D3ZHR3	3-ketoacyl-CoA thiolase A, peroxisomal;3-ketoacyl-CoA thiolase B, peroxisomal	Acaa1a;Acaa1b	18	43.1	44.825	0
G3V9E3;Q62736;F1LQD6;REV__D3ZXH0;REV__D3ZRB1;REV__D3ZZ81;REV__F1M8A4	Non-muscle caldesmon	Cald1	18	30.7	60.611	3.78e-103
G3V9G2;Q9JJ54;G3V6A4;Q9JJ54-3;G3V6A5;Q9JJ54-2;Q9JJ54-4;P17132	Heterogeneous nuclear ribonucleoprotein D0;Heterogeneous nuclear ribonucleoprotein C	Hnrpd;Hnrnpd;Hnrnpc	5	14.4	38.218	1.27e-19
G3V9J1;P14046;F1M4L8;P06238	Alpha-1-inhibitor 3	LOC297568;A1i3;Cpamd8	3	2.7	163.72	1.86e-29
G3V9L3		Dusp3	3	20.9	23.115	5.47e-47
G3V9N8;P52303;D3ZT02;P52303-2;D3ZS80	AP-1 complex subunit beta-1	Ap1b1	5	6.3	104.54	1.02e-33
G3V9R0;F1LNK3;F1LNB8;D3ZFH3		Luc7l	12	41.5	38.481	1e-135
G3V9R4;O35826	Bifunctional UDP-N-acetylglucosamine 2-epimerase/N-acetylmannosamine kinase;UDP-N-acetylglucosamine 2-epimerase;N-acetylmannosamine kinase	Gne	24	35.5	82.911	0
G3V9U2;F1LWF9;P13437	3-ketoacyl-CoA thiolase, mitochondrial	Acaa2	29	73.8	41.885	0
G3V9V3;Q62871;Q62871-2;Q6AZ35;D3ZU74;Q62871-3;G3V792;Q63100;Q63100-3;D4A9K8;Q63100-4	Cytoplasmic dynein 1 intermediate chain 2	Dync1i2	5	12.1	71.338	4.06e-68
G3V9Y7;Q5BK32	FAS-associated factor 2	Faf2	9	28.1	52.46	8.91e-39
G3V9Z4;Q5I0J9	Putative L-aspartate dehydrogenase	Aspdh	11	50.9	30.388	2.51e-121
O08557;F1LNX0	N(G),N(G)-dimethylarginine dimethylaminohydrolase 1	Ddah1	5	27	31.426	4.38e-19
O08629;F1M1W6	Transcription intermediary factor 1-beta	Trim28	11	17	88.955	1.3e-158
O09171	Betaine--homocysteine S-methyltransferase 1	Bhmt	25	64.4	44.976	0
O35077;F1M3R0	Glycerol-3-phosphate dehydrogenase [NAD(+)], cytoplasmic	Gpd1	17	46.7	37.452	0
O35142	Coatomer subunit beta	Copb2	24	34.5	102.55	0
O35244;F8WG72	Peroxiredoxin-6	Prdx6	10	61.2	24.818	4.05e-137
O35303;O35303-4;O35303-5;O35303-6;O35303-2;D3ZWE4;D4ABS2;O35303-3	Dynamin-1-like protein	Dnm1l	3	4.4	83.907	7.33e-18
O35509;P62494;F1M0S1	Ras-related protein Rab-11B;Ras-related protein Rab-11A	Rab11b;Rab11a	6	28	24.488	7.17e-18
O35547	Long-chain-fatty-acid--CoA ligase 4	Acsl4	2	4.6	74.326	5.61e-13
O35824;Q5M9H7	DnaJ homolog subfamily A member 2	Dnaja2	5	11.7	45.765	5.05e-19
O35952;F1LQI1;O35952-2	Hydroxyacylglutathione hydrolase, mitochondrial	Hagh	3	17.2	34.109	1.53e-32
O55096;F1M7X8	Dipeptidyl peptidase 3	Dpp3;Dpp3l	7	13.1	83.038	3.54e-128
O70351;F1LNT4	3-hydroxyacyl-CoA dehydrogenase type-2	Hsd17b10	11	48.3	27.245	3.21e-153
O88202	60 kDa lysophospholipase;L-asparaginase;Platelet-activating factor acetylhydrolase	Aspg	9	25.9	60.794	1.28e-115
O88321;D4A9C9		Psmd4	9	30.5	41.073	3.57e-119
O88618	Formimidoyltransferase-cyclodeaminase;Glutamate formimidoyltransferase;Formimidoyltetrahydrofolate cyclodeaminase	Ftcd	20	39.9	58.913	5.89e-231
O88767;Q5BKC3	Protein DJ-1	Park7	7	37.6	19.974	8.06e-19
O88989	Malate dehydrogenase, cytoplasmic	Mdh1	9	32.6	36.483	3.13e-53
O89035		Slc25a10	5	17.8	31.454	4.65e-10
P00173;D4A1G4;P00173-2	Cytochrome b5	Cyb5a	10	56.7	15.355	3.07e-135
P00481;F1MAE6	Ornithine carbamoyltransferase, mitochondrial	Otc	9	27.1	39.886	1.63e-19
P00502;Q6TUG1;D3ZD94	Glutathione S-transferase alpha-1	Gsta1	2	7.7	25.607	6.12e-68
P00507;F1LXI9	Aspartate aminotransferase, mitochondrial	Got2	6	19.8	47.314	3.83e-18
P00884;Q66HT1	Fructose-bisphosphate aldolase B;Fructose-bisphosphate aldolase	Aldob	25	54.9	39.618	2.23e-260
P01026	Complement C3;Complement C3 beta chain;Complement C3 alpha chain;Neutrophil chemotactic factor-2;C3a anaphylatoxin;Complement C3b alpha chain;Complement C3c alpha chain fragment 1;Complement C3dg fragment;Complement C3g fragment;Complement C3d fragment;Complement C3f fragment;Complement C3c alpha chain fragment 2	C3	23	17.7	186.46	2.66e-255
P01946;G3V8R3	Hemoglobin subunit alpha-1/2	Hba1	9	66.9	15.328	3.42e-277
P02091;CON__Q3SX09;O88752;CON__P02070	Hemoglobin subunit beta-1	Hbb	6	33.3	15.979	0
P02262;P0CC09;D4ACV3	Histone H2A type 1;Histone H2A type 2-A;Histone H2A	Hist2h2aa3;Hist2h2ac	2	13.8	14.077	1.57e-108
P02600;P02600-2;P17209	Myosin light chain 1/3, skeletal muscle isoform	Myl1	2	11.6	20.679	2.32e-150
P02650	Apolipoprotein E	Apoe	8	30.4	35.753	8.47e-30
P02680;P02680-2	Fibrinogen gamma chain	Fgg	6	19.8	50.632	2.29e-98
P02692	Fatty acid-binding protein, liver	Fabp1	11	66.1	14.272	6.57e-155
P02706;D3ZMH8	Asialoglycoprotein receptor 1	Asgr1	11	35.6	32.849	6.48e-56
P02770	Serum albumin	Alb	18	31.1	68.73	5.12e-72
P04041	Glutathione peroxidase 1	Gpx1	15	62.7	22.323	1.06e-181
P04642;F1M7I5;F1M2L5;D4AD97;P19629;Q6AYX2;D3ZM24;F1M1K4	L-lactate dehydrogenase A chain;L-lactate dehydrogenase	Ldha	22	63	36.45	0
P04762;D3ZYF1;Q499V8	Catalase	Cat	33	64.9	59.756	0
P04764;D3ZJT8;F1M8W1;F1M6P0;D3ZKP2;P15429;F1LTP6;D3ZYU0;F1M2K7;F1M383;P07323;D4A0Q2;F1M9V3;G8JLQ8;F1M5J0	Alpha-enolase	Eno1	18	50.7	47.127	2.49e-162
P04785	Protein disulfide-isomerase	P4hb	28	51.5	56.951	2.64e-129
P04797;D3ZGY4;E9PTN6;F8WFP3;F1M2U5;D3ZKR3;F1M0Y3;F1M9J7;F1LW99;F1LTU2;F1LUR7;D3ZWV2;F1M359;D3ZDS1;F1LZV7;F1LU03;D3ZQC7;D3ZWP0;F1LY57;D4A3W5;D3ZIY0;F1LUI2;F1LUV3;D4A7F9;F1LZ22;D3Z8U8;F1M9J9;F1M9K7;B1WBQ8;Q9ESV6;D3ZQT0;D4A6J7;D3ZEN2;F1M5I8;F1M4G6;F1M2N4;F1M261;F1M0P5;F1LW42;F1LTV2;F1LW78;D3ZPI7;D4AB12;D3ZXS2;D3ZME3;D3ZW22;D3Z8G2;F1M269;F1MA05;F1LT88;F1M045;E9PTV9;F1M5K4;D3Z7Z7;F1LVS0;D3ZHE9;F1M3A3;…	Glyceraldehyde-3-phosphate dehydrogenase	Gapdh;RGD1560797;RGD1564688	13	43.5	35.828	0
P04904;P46418;Q6AXY0	Glutathione S-transferase alpha-3	Gsta3	10	39.8	25.319	6.3e-74
P05179;D3Z7Y1	Cytochrome P450 2C7	Cyp2c7;LOC100361347	21	38.2	56.186	0
P05182;F1LPJ4;D3ZJL9	Cytochrome P450 2E1	Cyp2e1	9	19.5	56.626	2.81e-30
P05197;F1LM66	Elongation factor 2	Eef2	55	53.1	95.283	0
P05369;F1LND7;D3ZJW2	Farnesyl pyrophosphate synthase	Fdps	11	29.2	40.829	1.1e-120
P06685;F1M9H2;D3ZE88;D3ZSA3;P06686;P06687;F1LRK1;G3V8S4;P54708;F1LMF3;Q64541;P54708-2;F1LUN7	Sodium/potassium-transporting ATPase subunit alpha-1	Atp1a1	5	6.1	113.05	2.45e-18
P06761	78 kDa glucose-regulated protein	Hspa5	42	60.4	72.346	0
P06866-2;P06866	Haptoglobin;Haptoglobin alpha chain;Haptoglobin beta chain	Hp	4	12.1	42.474	1.44e-08
P07153	Dolichyl-diphosphooligosaccharide--protein glycosyltransferase subunit 1	Rpn1	20	42.5	68.303	1.65e-207
P07379;F1LQJ7	Phosphoenolpyruvate carboxykinase, cytosolic [GTP]	Pck1	27	51.8	69.415	3.94e-284
P07633;Q68FZ8;D3Z9A2	Propionyl-CoA carboxylase beta chain, mitochondrial	Pccb	2	5.4	58.626	1.29e-60
P07687;F1LTS8;F8WG46	Epoxide hydrolase 1	Ephx1	7	19.1	52.581	2.6e-27
P07756;F1M9N2	Carbamoyl-phosphate synthase [ammonia], mitochondrial	Cps1	22	14.9	164.58	0
P07824	Arginase-1	Arg1	18	67.2	34.973	3.35e-155
P07872-2;P07872;F1M609;F1LQC1	Peroxisomal acyl-coenzyme A oxidase 1;Peroxisomal acyl-CoA oxidase 1, A chain;Peroxisomal acyl-CoA oxidase 1, B chain;Peroxisomal acyl-CoA oxidase 1, C chain;Acyl-coenzyme A oxidase	Acox1	24	45.2	74.69	0
P07896	Peroxisomal bifunctional enzyme;Enoyl-CoA hydratase/3,2-trans-enoyl-CoA isomerase;3-hydroxyacyl-CoA dehydrogenase	Ehhadh	49	60.5	78.657	0
P07953;P07953-2;F1LQX5;P25114;F1M7B7	6-phosphofructo-2-kinase/fructose-2,6-bisphosphatase 1;6-phosphofructo-2-kinase;Fructose-2,6-bisphosphatase	Pfkfb1	14	32.9	54.763	6.75e-132
P08010;D4AB97;F1LXL7;D4AB87	Glutathione S-transferase Mu 2	Gstm2	13	48.6	25.702	1.4e-178
P08011	Microsomal glutathione S-transferase 1	Mgst1	6	36.8	17.471	5.57e-32
P08033	Gap junction beta-1 protein	Gjb1	4	13.4	32.003	4.83e-21
P08081;D3ZPJ7;P08081-2	Clathrin light chain A	Clta	8	29	26.98	4.79e-69
P08503;G3V796	Medium-chain specific acyl-CoA dehydrogenase, mitochondrial	Acadm	14	41.1	46.555	1.34e-135
P08541;D3ZLR6;F1LLV5;Q62789;G3V688	UDP-glucuronosyltransferase 2B2	Ugt2b	4	7	60.985	1.28e-30
P08649;F1LNM4	Complement C4;Complement C4 beta chain;Complement C4 alpha chain;C4a anaphylatoxin;Complement C4 gamma chain	C4;C4-2	5	4.7	192.16	7.1e-188
P08683;P11510;E9PTW8;F1LSA2;P04167-2;B2GV28;P00176;P04167	Cytochrome P450 2C11	Cyp2c11	14	31.6	57.18	4.97e-85
P09006	Serine protease inhibitor A3N	Serpina3n	10	24.9	46.651	3.54e-163
P09034	Argininosuccinate synthase	Ass1	48	77.9	46.496	0
P09118;F1LZ17	Uricase	Uox	3	14.5	34.934	7.61e-27
P09139;P09139-2	Serine--pyruvate aminotransferase, mitochondrial	Agxt	13	31.9	45.834	9.37e-74
P09367;F1LMK6;P09367-2	L-serine dehydratase/L-threonine deaminase	Sds	8	26.7	38.432	2.21e-63
P09495	Tropomyosin alpha-4 chain	Tpm4	26	63.7	28.509	0
P09527	Ras-related protein Rab-7a	Rab7a	3	16.9	23.504	1.92e-18
P09606	Glutamine synthetase	Glul	14	35.9	42.267	8.27e-282
P09811;G3V8V3;B2GV03;G3V6Y6;P53534;P09812	Glycogen phosphorylase, liver form	Pygl	61	54.5	97.482	0
P0C2X9;F1LQ99;F8WFI0	Delta-1-pyrroline-5-carboxylate dehydrogenase, mitochondrial	Aldh4a1	12	21.8	61.868	1.02e-58
P10111;F1LU07;F1M4T9	Peptidyl-prolyl cis-trans isomerase A;Peptidyl-prolyl cis-trans isomerase	Ppia	6	36	17.874	5.51e-54
P10634	Cytochrome P450 2D26	Cyp2d26	11	28.4	56.683	3.2e-206
P10760;D4AB27;D3ZQH8	Adenosylhomocysteinase	Ahcy	24	44.4	47.538	1.24e-233
P10860	Glutamate dehydrogenase 1, mitochondrial	Glud1	28	42.3	61.415	0
P10867;F1LR61;F1M5I9;F1LZB1	L-gulonolactone oxidase	Gulo	4	8	50.615	6.97e-10
P10888	Cytochrome c oxidase subunit 4 isoform 1, mitochondrial	Cox4i1	3	16.6	19.514	1.16e-06
P11232	Thioredoxin	Txn	4	25.7	11.673	1.59e-13
P11348	Dihydropteridine reductase	Qdpr	9	45.2	25.552	6.59e-56
P11497;P11497-2;F1LP35;D3ZRA3	Acetyl-CoA carboxylase 1;Biotin carboxylase	Acaca	35	21.8	265.19	0
P11517	Hemoglobin subunit beta-2		4	32	15.982	0
P11598	Protein disulfide-isomerase A3	Pdia3	25	51.1	56.623	1.37e-155
P11711	Cytochrome P450 2A1	Cyp2a1	2	4.3	55.994	8.77e-42
P11915;F1LQ55;P11915-2;Q6QI48	Non-specific lipid-transfer protein	Scp2	25	44.8	58.813	8.21e-285
P11951;F1M733;P11950	Cytochrome c oxidase subunit 6C-2	Cox6c2	4	46.1	8.4548	1.95e-13
P11980;P11980-2;F1MAC8;D4ADU8	Pyruvate kinase isozymes M1/M2;Pyruvate kinase	Pkm2	3	9.2	57.817	1.62e-15
P12001;D4AD69;D3ZWH7	60S ribosomal protein L18	Rpl18	13	50.5	21.658	4.31e-110
P12007	Isovaleryl-CoA dehydrogenase, mitochondrial	Ivd	6	12.5	46.435	2.45e-24
P12075	Cytochrome c oxidase subunit 5B, mitochondrial	Cox5b	3	20.9	13.915	8.52e-07
P12785	Fatty acid synthase;[Acyl-carrier-protein] S-acetyltransferase;[Acyl-carrier-protein] S-malonyltransferase;3-oxoacyl-[acyl-carrier-protein] synthase;3-oxoacyl-[acyl-carrier-protein] reductase;3-hydroxypalmitoyl-[acyl-carrier-protein] dehydratase;Enoyl-[acyl-carrier-protein] reductase;Oleoyl-[acyl-carrier-protein] hydrolase	Fasn	88	42	272.65	0
P12928-2;P12928;D3ZH85;F1LTA5	Pyruvate kinase isozymes R/L	Pklr	31	68.9	58.793	0
P12939;Q5I0P9	Cytochrome P450 2D10	Cyp2d10;Cyp2d5	2	5.8	57.076	5.12e-227
P13086	Succinyl-CoA ligase [ADP/GDP-forming] subunit alpha, mitochondrial	Suclg1	11	26	36.148	1.7e-106
P13107;F1LME8;G3V9D2	Cytochrome P450 2B3	Cyp2b3	4	7.7	56.384	2.39e-11
P13255	Glycine N-methyltransferase	Gnmt	8	33.1	32.549	1.23e-94
P13444	S-adenosylmethionine synthase isoform type-1	Mat1a	11	18.9	43.697	0
P13471;Q6PDV6;D4A290;F1MA00	40S ribosomal protein S14	Rps14	9	41.7	16.259	3.02e-177
P13803;REV__Q9Z2Y1;REV__E9PTS7;REV__E9PU68;REV__F1MAI7	Electron transfer flavoprotein subunit alpha, mitochondrial	Etfa	10	32.7	34.951	1.34e-36
P13832	Myosin regulatory light chain RLC-A	Rlc-a	2	16.3	19.895	0
P14056;F1M9C3	Serine/threonine-protein kinase A-Raf	Araf	6	19.4	67.551	7.7e-38
P14141	Carbonic anhydrase 3	Ca3	15	74.2	29.431	0
P14408;Q5M964;P14408-2	Fumarate hydratase, mitochondrial	Fh	18	52.7	54.463	0
P14480-2;D3Z8Y5;P14480;CON__P02676	Fibrinogen beta chain;Fibrinopeptide B;Fibrinogen beta chain	Fgb	5	10.3	56.612	2.92e-40
P14604	Enoyl-CoA hydratase, mitochondrial	Echs1	4	19.3	31.516	6.19e-17
P14669;F1LSV5;F1M3H7;F1M0L7;Q6TXF2	Annexin A3;Annexin	Anxa3	4	13.9	36.363	4.32e-08
P14942;F1LVC6;D3ZBD6	Glutathione S-transferase alpha-4;Glutathione S-transferase	Gsta4;LOC100365881	3	13.1	25.51	2.48e-11
P15178	Aspartate--tRNA ligase, cytoplasmic	Dars	19	46.7	57.126	1.69e-141
P15650	Long-chain specific acyl-CoA dehydrogenase, mitochondrial	Acadl	9	23.3	47.872	7.44e-38
P15709;D3ZR55	Bile salt sulfotransferase	St2a1	2	9.2	33.19	1.57e-193
P15865;D4A3K5	Histone H1.2	Hist1h1c	5	20.1	21.987	4.51e-37
P15999;F1LP05	ATP synthase subunit alpha, mitochondrial;ATP synthase subunit alpha	Atp5a1	42	60.4	59.753	0
P16617;Q5XIV1;D4A9Z5	Phosphoglycerate kinase 1	Pgk1	26	61.2	44.538	0
P16970;F1LR38	ATP-binding cassette sub-family D member 3	Abcd3	38	47.5	75.315	0
P17074;D4A6G6;D3ZSH6;F1LYF3;F1M764;F1M8C7;D3ZUD7;D3ZGN8;F1M395;F1M9M2;D4A8B9;F1LYT7;F1LUH5	40S ribosomal protein S19	Rps19;LOC100362339;LOC100360843;RGD1562153;LOC687298	18	75.2	16.085	5.44e-93
P17077;D3ZMB8;F1M7A9;F1LX84;D4ABC9;F1M2X8;D3ZZQ7;F1M309	60S ribosomal protein L9	Rpl9;RGD1561789;RGD1561928	10	48.4	21.893	8.43e-91
P17078;D3ZN79;D3ZB50;F1M6G3;D3Z942;D3ZEF3	60S ribosomal protein L35	Rpl35;LOC686074	7	42.3	14.552	1.63e-116
P17625;D3ZDS5;D4A5K9	Glycogen [starch] synthase, liver	Gys2	6	10.2	80.733	9.72e-86
P17712;P17712-3;P17712-2;Q64596	Glucokinase	Gck	8	21.7	52.116	1.36e-131
P17764	Acetyl-CoA acetyltransferase, mitochondrial	Acat1	9	27.6	44.695	1.46e-88
P17988	Sulfotransferase 1A1	Sult1a1	14	52.6	33.906	4.41e-201
P18163	Long-chain-fatty-acid--CoA ligase 1	Acsl1	26	36.1	78.178	0
P18297;D3ZT59	Sepiapterin reductase	Spr	4	18.7	28.128	1.65e-13
P18298;F1LRB8	S-adenosylmethionine synthase isoform type-2;S-adenosylmethionine synthase	Mat2a;LOC100363915	3	8.9	43.715	4.72e-199
P18418	Calreticulin	Calr	11	26	47.995	5.84e-85
P18420	Proteasome subunit alpha type-1	Psma1	3	16.3	29.517	5.88e-17
P18589;Q499Q3;D3ZUF7;P18590;D4A5U9	Interferon-induced GTP-binding protein Mx2;Interferon-induced GTP-binding protein Mx3	Mx2;Mx3	3	5.6	75.073	8.69e-86
P19112;F1LRT1;Q9Z1N1	Fructose-1,6-bisphosphatase 1	Fbp1	26	68.6	39.609	0
P19225	Cytochrome P450 2C70	Cyp2c70	4	10	56.156	7.43e-34
P19468	Glutamate--cysteine ligase catalytic subunit	Gclc	11	30	72.618	1.18e-197
P19511	ATP synthase subunit b, mitochondrial	Atp5f1	3	12.9	28.868	1.93e-85
P19804;Q05982;D3ZGV9	Nucleoside diphosphate kinase B;Nucleoside diphosphate kinase A	Nme2;Nme1	5	50.7	17.283	2.69e-35
P19945;D3ZJT4;F1M2B8;D3ZAV9	60S acidic ribosomal protein P0	Rplp0	14	47.3	34.215	7.01e-201
P20059	Hemopexin	Hpx	7	14.3	51.35	9.16e-20
P20070-2;P20070;P20070-3	NADH-cytochrome b5 reductase 3;NADH-cytochrome b5 reductase 3 membrane-bound form;NADH-cytochrome b5 reductase 3 soluble form	Cyb5r3	6	27	34.865	1.62e-38
P20673;Q4QRB8	Argininosuccinate lyase	Asl	24	47.7	51.549	2.05e-284
P20814;D3Z8S1	Cytochrome P450 2C13, male-specific	Cyp2c13;LOC100361492	3	8.2	55.859	4.76e-17
P20816	Cytochrome P450 4A2	Cyp4a2	4	11.3	57.968	1.78e-52
P21531;D3ZXU8;D4A9G1	60S ribosomal protein L3	Rpl3	27	53.8	46.135	4.81e-215
P21643	Tryptophan 2,3-dioxygenase	Tdo2	7	20.4	47.856	2.87e-45
P22734;P22734-2	Catechol O-methyltransferase	Comt	13	34.1	29.597	1.77e-106
P22791;F1M9Q5;P17425	Hydroxymethylglutaryl-CoA synthase, mitochondrial	Hmgcs2	21	38.6	56.911	0
P23457;P51652;G3V895;Q6AYQ2;D3ZEL2;F1LU12;F1M6N4;D3ZRB7	3-alpha-hydroxysteroid dehydrogenase	Akr1c9	24	61.8	37.027	0
P23514	Coatomer subunit beta	Copb1	18	25.8	107.01	0
P23965;Q68G41	Enoyl-CoA delta isomerase 1, mitochondrial	Eci1	3	15.2	32.254	4.78e-14
P24008;G8JLS2;P24008-2;F1M6Y1	3-oxo-5-alpha-steroid 4-dehydrogenase 1	Srd5a1	3	9.7	29.78	7.92e-07
P24329	Thiosulfate sulfurtransferase	Tst	6	22.6	33.406	1.62e-35
P24470;Q68G40	Cytochrome P450 2C23	Cyp2c23	11	22.9	56.432	6.45e-45
P25093;F1M6W1;D4AEK8	Fumarylacetoacetase	Fah	10	33.9	45.975	8.32e-111
P25113;P16290;F1M1Y1	Phosphoglycerate mutase 1;Phosphoglycerate mutase 2	Pgam1;Pgam2	9	40.6	28.832	7.91e-24
P25886;F1LYI5;D4A3G6;D3ZWV1;D4A883;D3Z8Q4;D3ZKM8;D4A7X3;F1LX53;D3ZIV1;D4AEL5;F1LW15;D3ZDV6;F1LVH1;F1M2K5;F1M3I7;F1M346;D3Z7Z0;F1LWX2;F1M4V2;F1LZU8;F1M4N2;D4A888;D4A1N7	60S ribosomal protein L29	Rpl29;RGD1564138	7	32.7	17.325	5.29e-17
P27364;F1LNS3;P22072;P22071;Q62878	3 beta-hydroxysteroid dehydrogenase type 5;3 beta-hydroxysteroid dehydrogenase/Delta 5-->4-isomerase type 2;3-beta-hydroxy-Delta(5)-steroid dehydrogenase;Steroid Delta-isomerase	Hsd3b5;Hsd3b	3	9.4	42.206	7.7e-63
P27867;Q6TUH3	Sorbitol dehydrogenase	Sord	16	35	38.234	7.65e-108
P27952;G3V957;E9PU05;E9PTY3;D3ZQW7;D3ZIY7;F1LUI9;F1LZV8;D4A577;E9PT76;E9PSQ6;D3ZT78;D3ZQ72;D3ZHD8;F1M5X9;D3ZW37;D3ZAS1;F1LVB4;D3ZP90;F1LUE4;F1M474;E9PTW0	40S ribosomal protein S2	Rps2;LOC100359960;LOC688473;RGD1560789	10	32.8	31.231	3.71e-38
P28037	Cytosolic 10-formyltetrahydrofolate dehydrogenase	Aldh1l1	44	50.9	98.873	0
P28480;F1LUR8	T-complex protein 1 subunit alpha	Tcp1	18	39.7	60.359	1.21e-106
P29147	D-beta-hydroxybutyrate dehydrogenase, mitochondrial	Bdh1	8	22.4	38.201	1.8e-26
P29314;D3ZV50;D3ZF87;F1LY44;D3ZGL8;D3ZTT5	40S ribosomal protein S9	Rps9;RGD1566136;LOC100364509	19	58.8	22.591	2.83e-73
P29410;P29410-2	Adenylate kinase 2, mitochondrial	Ak2	3	15.5	26.379	1.79e-05
P29419	ATP synthase subunit e, mitochondrial	Atp5i	3	42.3	8.2545	1.36e-07
P29457;Q5RJR9	Serpin H1	Serpinh1	6	22.8	46.517	2.8e-38
P30713	Glutathione S-transferase theta-2	Gstt2	10	43	27.439	3.23e-58
P31000;G3V8C3;F1M7P4;P21807;P12839;G3V7S2;G3V8Q2;P23565;P19527	Vimentin	Vim	50	80.5	53.732	0
P31044	Phosphatidylethanolamine-binding protein 1;Hippocampal cholinergic neurostimulating peptide	Pebp1	7	57.8	20.801	8.73e-75
P31210;F1LML3	3-oxo-5-beta-steroid 4-dehydrogenase	Akr1d1	25	81	37.377	0
P31399;D3ZWT8	ATP synthase subunit d, mitochondrial	Atp5h	3	25.5	18.763	1.03e-17
P32089;F1M1U5	Tricarboxylate transport protein, mitochondrial	Slc25a1	9	26	33.835	1.37e-23
P32232;F1LME2;P32232-2;D3ZPH9;P32232-3;D3ZSC5	Cystathionine beta-synthase	Cbs	4	8.7	61.454	1.29e-14
P32551	Cytochrome b-c1 complex subunit 2, mitochondrial	Uqcrc2	5	13.1	48.396	4.06e-13
P32755;F1LNW9	4-hydroxyphenylpyruvate dioxygenase	Hpd	18	53.7	45.112	7.84e-99
P34058;D4A2Z9;D4AE04;F1LT18;F1LYW7;F1M2F7;F1M4X8;D3ZNW2;D3ZZB5;D3ZXC7	Heat shock protein HSP 90-beta	Hsp90ab1	33	40.3	83.28	0
P35213;P35213-2	14-3-3 protein beta/alpha;14-3-3 protein beta/alpha, N-terminally processed	Ywhab	4	22.4	28.054	2.17e-142
P35427;Q5RK10	60S ribosomal protein L13a	Rpl13a	15	56.2	23.476	2.86e-50
P35704;D4AAA7	Peroxiredoxin-2	Prdx2	7	31.3	21.783	5.13e-31
P36201;D4ACX1	Cysteine-rich protein 2	Crip2	8	62	22.696	2.03e-33
P36876;P56932;P97888;P36877-2;D3ZB24;P36877;F1M738	Serine/threonine-protein phosphatase 2A 55 kDa regulatory subunit B alpha isoform;Serine/threonine-protein phosphatase 2A 55 kDa regulatory subunit B delta isoform;Serine/threonine-protein phosphatase 2A 55 kDa regulatory subunit B gamma isoform;Serine/threonine-protein phosphatase 2A 55 kDa regulatory subunit B beta isoform	Ppp2r2a;Ppp2r2d;Ppp2r2c;Ppp2r2b	2	6.9	51.677	6.56e-21
P38650;D3ZGC7	Cytoplasmic dynein 1 heavy chain 1	Dync1h1	24	5	532.25	0
P38918	Aflatoxin B1 aldehyde reductase member 3	Akr7a3	8	26.9	36.747	2.5e-30
P38983	40S ribosomal protein SA	Rpsa	8	47.1	32.824	2.19e-98
P39052;P39052-2;D3ZLB8;D3ZQ20;P39052-3;P39052-4;D4A003;Q08877-5;D3ZI80;Q08877-3;D3ZMH6;Q08877;D4A2M6;Q08877-12;Q08877-6;D3ZNS3;D4AAP9;P21575;P21575-5;D4A850;Q08877-10;Q08877-4;D3ZQQ5;Q08877-7;D4A0D1;D4AAL9;Q08877-2;Q08877-13;P21575-4;P21575-8;Q08877-11;P21575-2;P21575-6;D3ZKN2;Q08877-9;P21575-3;P21575-7;Q08877-8	Dynamin-2	Dnm2	12	17.8	98.229	1.07e-87
P40329	Arginine--tRNA ligase, cytoplasmic	Rars	9	18.2	75.81	6.75e-91
P41034	Alpha-tocopherol transfer protein	Ttpa	8	30.9	31.845	2.21e-112
P41123;D4A075;D3ZRM9;D3ZD02;D3Z9H4;F1M2E9;F1LUH3;D3ZFF0	60S ribosomal protein L13	Rpl13;LOC100361259;LOC100360491;RGD1563145	14	44.5	24.309	7.49e-211
P41498;P41498-2	Low molecular weight phosphotyrosine protein phosphatase	Acp1	9	47.5	18.151	1.1e-168
P41542;D4AAH7;D4AAI0;REV__P59215;REV__P59215-2	General vesicular transport factor p115	Uso1	24	31.6	107.16	0
P46462	Transitional endoplasmic reticulum ATPase	Vcp	34	44.3	89.348	7.54e-264
P46953	3-hydroxyanthranilate 3,4-dioxygenase	Haao	11	44.1	32.582	1.55e-54
P47942	Dihydropyrimidinase-related protein 2	Dpysl2	8	21.9	62.277	1.66e-163
P48037;Q6IMZ3;D4ABR6	Annexin A6;Annexin	Anxa6	9	15.8	75.753	9.58e-24
P48500	Triosephosphate isomerase	Tpi1	8	43.8	26.849	1.79e-54
P48508	Glutamate--cysteine ligase regulatory subunit	Gclm	5	24.1	30.548	2.73e-71
P49242;Q6TXJ6;D3ZV98;D3ZFW0	40S ribosomal protein S3a;40S ribosomal protein S3b	Rps3a	25	67	29.945	1.67e-186
P50116	Protein S100-A9	S100a9	2	24.8	13.145	1.99e-33
P50237	Sulfotransferase 1C1	Sult1c1	16	62.2	35.764	2.83e-130
P50475;F1LS09	Alanine--tRNA ligase, cytoplasmic	Aars	30	36.7	106.79	0
P50503	Hsc70-interacting protein	St13	3	9	41.279	0.00026615
P51635	Alcohol dehydrogenase [NADP(+)]	Akr1a1	9	32.6	36.505	1.35e-51
P52631;D3Z8V9	Signal transducer and activator of transcription 3	Stat3	20	34.9	88.039	0
P52759;F8WFW1	Ribonuclease UK114	Hrsp12	7	57.7	14.303	2.86e-32
P52845;P49889;F1LNK1;Q9WUW9;D3ZK28;F1LZT0	Estrogen sulfotransferase, isoform 2;Estrogen sulfotransferase, isoform 3	Ste2;Ste	3	6.1	35.364	2.38e-49
P52847	Sulfotransferase family cytosolic 1B member 1	Sult1b1	22	61.5	34.835	0
P52873	Pyruvate carboxylase, mitochondrial	Pc	47	48.3	129.78	0
P54319;D3ZDI0	Phospholipase A-2-activating protein	Plaa	10	15.2	87.083	1.54e-130
P54777;D3ZBJ9;F8WG23	Peroxisome assembly factor 2	Pex6	17	21.3	104.43	4.13e-80
P55006;F1LVY2;D3ZBV0;D3ZJP5	Retinol dehydrogenase 7	Rdh7	3	6	35.736	1.27e-104
P55051	Fatty acid-binding protein, brain	Fabp7	3	31.1	14.864	2.94e-13
P55159	Serum paraoxonase/arylesterase 1	Pon1	4	12.7	39.358	1.85e-31
P56571	ES1 protein homolog, mitochondrial		8	33.1	28.172	8.29e-169
P57093	Phytanoyl-CoA dioxygenase, peroxisomal	Phyh	12	33.7	38.588	3.04e-66
P57113	Maleylacetoacetate isomerase	Gstz1	9	47.2	23.961	1.09e-88
P61206;P84079;P84082;F1M0J2	ADP-ribosylation factor 3;ADP-ribosylation factor 1;ADP-ribosylation factor 2	Arf3;Arf1;Arf2	4	28.7	20.601	3.49e-111
P61314;D3ZU80;D3ZXA2;D3ZF52	60S ribosomal protein L15;Ribosomal protein L15	Rpl15;RGD1560501	15	56.9	24.146	8.4e-78
P61354;D4AD41;D3ZTK5;D3ZYF9;D3ZZV8;F1M0X8	60S ribosomal protein L27	Rpl27;LOC688784;RGD1563835;RGD1565900	12	66.2	15.798	3.05e-104
P61515;F1LNS9;D4A7B1;D4AAZ6;D3ZGU1;D4A829;F1M3Q2	Putative 60S ribosomal protein L37a;60S ribosomal protein L37a	Rpl37a-ps1;LOC679823;Rpl37a	8	73.9	10.275	6.27e-39
P61589;B2RYP0;P62747;Q5XIM3	Transforming protein RhoA	Rhoa;Rhoc	4	24.4	21.782	2.4e-37
P61983	14-3-3 protein gamma;14-3-3 protein gamma, N-terminally processed	Ywhag	4	17.8	28.302	9.25e-55
P62083;Q6AY74;D4AC24;F1M8D1	40S ribosomal protein S7	Rps7	13	66.5	22.127	1.7e-166
P62193	26S protease regulatory subunit 4	Psmc1	24	56.6	49.184	9.2e-262
P62198	26S protease regulatory subunit 8	Psmc5	29	74.9	45.626	0
P62243;D3ZIE1;Q6TXJ0;D3ZT31;F1M7J4	40S ribosomal protein S8	Rps8;RGD1566369;LOC297756	16	52.4	24.205	2.12e-235
P62246;D3ZLL8;D4A8P1;D3ZZC7;D3ZS61;D3ZFC7;D3ZQT6;F1M5P5	40S ribosomal protein S15a	Rps15a;LOC100361715;LOC687680;LOC100362139	9	46.2	14.839	4.76e-214
P62260	14-3-3 protein epsilon	Ywhae	7	25.1	29.174	1.9e-71
P62268;D4A9Q3	40S ribosomal protein S23	Rps23;RGD1563570	6	30.1	15.807	8.74e-25
P62271;D3ZM33;D3ZII2;D3ZAU6;F1M6D1;D4AA93;F1M2A2	40S ribosomal protein S18	Rps18;LOC100362298;RGD1562404;RGD1561919	23	67.8	17.718	5.36e-144
P62275	40S ribosomal protein S29	Rps29	5	58.9	6.6767	5.82e-39
P62278;F1LMB4	40S ribosomal protein S13	Rps13	11	46.4	17.222	5.98e-69
P62703;D3ZX01;D4AEI1;D3ZFZ5;D3ZJQ1	40S ribosomal protein S4, X isoform	Rps4x	25	72.2	29.597	1.24e-198
P62716;P63331;D3ZHP2	Serine/threonine-protein phosphatase 2A catalytic subunit beta isoform;Serine/threonine-protein phosphatase 2A catalytic subunit alpha isoform;Serine/threonine-protein phosphatase	Ppp2cb;Ppp2ca	2	10.7	35.575	1.39e-70
P62755;D3Z9H5;D3ZBN8;D4A8N8	40S ribosomal protein S6	Rps6	19	45.4	28.68	0
P62804;F1M449	Histone H4;Osteogenic growth peptide	Hist1h4b	5	39.8	11.367	6.59e-15
P62815;D3ZZS8	V-type proton ATPase subunit B, brain isoform	Atp6v1b2	10	24.1	56.55	1.4e-61
P62828;Q66H11;Q8K586	GTP-binding nuclear protein Ran;GTP-binding nuclear protein Ran, testis-specific isoform	Ran;RGD1306195;Rasl2-9	8	35.6	24.423	1.46e-72
P62832;D3ZUS1	60S ribosomal protein L23	Rpl23	13	70.7	14.865	9.75e-186
P62845;D3ZAK6	40S ribosomal protein S15	Rps15;LOC100360484	7	46.9	17.04	2.33e-90
P62853;F1M6F4;D4AE10;D3ZCH5;D3ZWX8	40S ribosomal protein S25	Rps25;RGD1564597;RGD1563613;LOC100359763;LOC685085	9	48	13.742	8.63e-89
P62856;D3Z8D7;F1M3V7;F1M6H7;D3ZJ54;D4AAJ9;F1LYT3;F1M5Y5	40S ribosomal protein S26	Rps26;LOC100361854;RGD1562415;LOC100361756;RGD1565117	5	39.1	13.015	7.15e-23
P62890;D4A1E6;D3ZA94;F1M3Q4	60S ribosomal protein L30	Rpl30	6	56.5	12.784	5.64e-34
P62893	60S ribosomal protein L39	Rpl39	2	23.5	6.4066	6.05e-12
P62902;D3ZX87;D4ABZ9;D4ACQ2;D3ZKU5;D3ZZ60;D3ZU04;D3ZK34;D3Z8W1	60S ribosomal protein L31	Rpl31;LOC100361974;LOC690384;RGD1564839;LOC681356;RGD1565894;LOC680384	2	18.4	14.463	2.88e-42
P62907;D4A7Y6;F1LYQ7;D3ZBX4;F1M8D2;D3Z9F6	60S ribosomal protein L10a;Ribosomal protein	Rpl10a;RGD1566137;LOC680700;RGD1559639	11	41.5	24.831	5.06e-67
P62909;D3ZVH2	40S ribosomal protein S3	Rps3;RGD1560831	23	82.7	26.674	5.32e-189
P62912;D4A890;D4A412;D4A8R0;D3ZAC3;D3ZWL0;D3ZRY2;D4ACC7	60S ribosomal protein L32	Rpl32;LOC100363713	7	34.8	15.86	1.21e-50
P62914;F2Z3S4	60S ribosomal protein L11	Rpl11	11	39.9	20.252	1.32e-70
P62919;D4A6W6	60S ribosomal protein L8	Rpl8;RGD1561333	17	44.7	28.024	5.51e-137
P62944-2;P62944	AP-2 complex subunit beta	Ap2b1	10	10.7	105.69	5.88e-57
P62963;CON__P02584	Profilin-1	Pfn1	9	67.1	14.957	3.19e-186
P62982;D3ZCM1;F1LML2;Q63429;P0CG51;G3V9Z2;P62986;F1M5M5;F1M5P0;F1M4U4;F1LU69;D4A0J6;F1LYW3;F1M927;F1M282;F1M0Q4;F1M9H9;F1M516;D4A2F5;F1M148;F1M3P8;F1M2X0	Ubiquitin-40S ribosomal protein S27a;Ubiquitin;40S ribosomal protein S27a;Polyubiquitin-C;Ubiquitin;Ubiquitin-related;Polyubiquitin-B;Ubiquitin;Ubiquitin-60S ribosomal protein L40;Ubiquitin;60S ribosomal protein L40	Rps27a;Ubc;Ubb;LOC100360548;Uba52	11	69.9	17.951	9.95e-96
P62997;D3ZLN0;F1LVK5	Transformer-2 protein homolog beta	Tra2b	9	33.7	33.665	2.36e-34
P63018;D4A4S3;F1LLW5;F1LZI1;P14659;F1M2Y7;D3ZH98;F1LPF5;P55063;Q07439;F1LM52	Heat shock cognate 71 kDa protein	Hspa8	34	51.4	70.87	0
P63029;D3ZFK4	Translationally-controlled tumor protein	Tpt1	2	14	19.462	5.43e-06
P63036	DnaJ homolog subfamily A member 1	Dnaja1	11	34.5	44.868	6.01e-156
P63039;D4ABH6;D3Z9X1;D3ZVX2;F1M6U4	60 kDa heat shock protein, mitochondrial	Hspd1	28	46.6	60.955	1.97e-170
P63102	14-3-3 protein zeta/delta	Ywhaz	6	26.9	27.771	5.45e-158
P63174;D4AD70;D3ZZH2;D3ZW57;D4A862	60S ribosomal protein L38	Rpl38;RGD1561636;LOC680353;LOC100365156	6	57.1	8.2178	6.47e-42
P63245	Guanine nucleotide-binding protein subunit beta-2-like 1	Gnb2l1	14	46.1	35.076	7.21e-134
P67779;D3ZN73;D4A508;D3ZFE2;F1LWX0	Prohibitin	Phb	3	12.5	29.82	4.57e-14
P68035;P68136	Actin, alpha cardiac muscle 1;Actin, alpha skeletal muscle	Actc1;Acta1	2	8.8	42.019	0
P68101	Eukaryotic translation initiation factor 2 subunit 1	Eif2s1	5	27.3	36.108	3.8e-69
P68255;D3ZM53;D3ZCY6	14-3-3 protein theta	Ywhaq	4	15.9	27.778	2.15e-54
P69897	Tubulin beta-5 chain	Tubb5	3	9.7	49.67	0
P70470	Acyl-protein thioesterase 1	Lypla1	4	18.7	24.708	1.13e-11
P70567;Q6IMZ5;D3ZSG3	Tropomodulin-1	Tmod1	7	26.2	40.48	1.33e-41
P80254	D-dopachrome decarboxylase	Ddt	5	50.8	13.133	2.18e-18
P81795;D3ZSB4	Eukaryotic translation initiation factor 2 subunit 3	Eif2s3	5	15.7	51.079	4.45e-83
P82995;F1LTA7;D3ZE66;F1M5B6;D4ABF9;D3ZSM0	Heat shock protein HSP 90-alpha	Hsp90aa1	17	23.5	84.814	0
P83732	60S ribosomal protein L24	Rpl24	10	51.6	17.779	4.49e-47
P84092;D3ZSE7;F1LZR8	AP-2 complex subunit mu	Ap2m1	16	34.5	49.654	3.2e-62
P84100;F1M5A9;D3ZYJ9;F1LYA5;F1LZL7	60S ribosomal protein L19	Rpl19	16	46.4	23.466	3.92e-137
P85108;Q3KRE8	Tubulin beta-2A chain;Tubulin beta-2B chain	Tubb2a;Tubb2b	6	22.2	49.906	0
P85834;F8WFG8	Elongation factor Tu, mitochondrial	Tufm	13	31.6	49.522	3.67e-127
P85973;D3ZXK9	Purine nucleoside phosphorylase	Pnp	12	52.9	32.302	1.02e-146
P97524;D3ZSL9;D3ZUP3;F1LRI0	Very long-chain acyl-CoA synthetase	Slc27a2	22	41.8	70.693	0
P97532	3-mercaptopyruvate sulfurtransferase	Mpst	4	14.5	32.94	3.59e-21
P97536;F8WGA1;D4AAI5;Q9R0L4-2	Cullin-associated NEDD8-dissociated protein 1	Cand1	27	25.3	136.36	2.23e-255
P97608	5-oxoprolinase	Oplah	26	26.2	137.72	1.39e-216
Q01177	Plasminogen;Plasmin heavy chain A;Activation peptide;Angiostatin;Plasmin heavy chain A, short form;Plasmin light chain B	Plg	6	11.8	90.535	3.43e-25
Q02974;D3ZN65;Q02974-2	Ketohexokinase	Khk	7	18.5	32.749	6.19e-54
Q03248;D3Z8J1	Beta-ureidopropionase	Upb1	12	45.8	44.042	4.4e-219
Q03336	Regucalcin	Rgn	21	62.2	33.389	0
Q04462	Valine--tRNA ligase	Vars	5	6.6	140.37	1.32e-76
Q06647	ATP synthase subunit O, mitochondrial	Atp5o	13	65.3	23.397	1.91e-165
Q07009	Calpain-2 catalytic subunit	Capn2	3	4	79.918	9.52e-15
Q07014;Q07014-2;Q4KM97	Tyrosine-protein kinase Lyn	Lyn	4	10.4	58.659	1.57e-29
Q07071	Glucokinase regulatory protein	Gckr	12	27.6	68.917	5.84e-150
Q09073;D4A481;Q05962;Q6P9Y4;D3ZE29;F1LZS8;D3ZB81;F1LXE6;D4A2A1	ADP/ATP translocase 2;ADP/ATP translocase 1	Slc25a5;Slc25a4	13	38.6	32.901	1.54e-34
Q09167;F8WFV0;Q09167-2	Serine/arginine-rich splicing factor 5	Srsf5	7	27.5	30.891	3.84e-20
Q0VGK3	Glycerate kinase	Glyctk	9	18.5	55.187	3.62e-177
Q0ZFS8;D3ZL34;F1LT59		Srsf3;rCG_61099	13	51.2	19.329	1.12e-136
Q0ZHH6;F1LR13;Q0ZHH6-2;Q6PST4;D3ZJE7	Atlastin-3	Atl3	5	9.2	60.585	9.32e-28
Q10758;CON__H-INV:HIT000292931;CON__Q9H552;CON__P08729;CON__Q3KNV1;CON__Q9DCV7;Q6IG12;G3V712;CON__Q6ISB0;CON__Q9NSB2;CON__H-INV:HIT000016045;CON__REFSEQ:XP_092267	Keratin, type II cytoskeletal 8	Krt8	17	28.4	54.018	0
Q1JU68;F1LRG1	Eukaryotic translation initiation factor 3 subunit A	Eif3a	25	19.1	163.19	3.52e-106
Q2PQA9;F1M8F2;G3V6L4;Q6QLM7;P56536	Kinesin-1 heavy chain	Kif5b	18	24.3	109.53	6.59e-221
Q32PZ3	Protein unc-45 homolog A	Unc45a	14	15.4	103.24	2.21e-43
Q32Q06;D3ZRP6	AP-1 complex subunit mu-1	Ap1m1	13	40	48.556	7.94e-97
Q3B7U9	Peptidyl-prolyl cis-trans isomerase FKBP8	Fkbp8	5	13.9	43.555	6.92e-22
Q3KRF2;Q9Z1A6;D3ZWX5;Q6P513	Vigilin	Hdlbp	53	48.4	141.69	0
Q3MHS9;D4AD79;D3ZZG6		Cct6a	17	32.2	58.017	9.09e-164
Q3MIB4;D4A1B4;Q6TXI3	Lon protease homolog 2, peroxisomal;Lon protease homolog	Lonp2	5	11.6	94.392	2.42e-48
Q3MID4		Shpk	4	11.4	50.638	2.38e-99
Q3MIE0	Enoyl-CoA hydratase domain-containing protein 3, mitochondrial	Echdc3	6	22	32.385	1.33e-18
Q3MIE4		Vat1	6	19.6	43.118	2.61e-32
Q3T1J1;G3V7J7;D3ZWY2	Eukaryotic translation initiation factor 5A-1	Eif5a;Eif5a2	5	18.8	16.832	1.19e-22
Q3T1K5	F-actin-capping protein subunit alpha-2	Capza2	9	53.8	32.967	2.99e-202
Q3T1L0	Aldehyde dehydrogenase family 16 member A1	Aldh16a1	17	22.9	85.413	1.2e-129
Q497B0	Omega-amidase NIT2	Nit2	19	52.5	30.701	1.63e-302
Q498D8		Rbx1	2	17.6	12.274	4.83e-39
Q499N6;D3ZK51	UBX domain-containing protein 1	Ubxn1	5	22.2	33.581	8.84e-20
Q499Q4;P38652;D3ZSP5	Phosphoglucomutase-1	Pgm1	13	27	61.389	1.51e-44
Q499R7		Ppa1	10	36.9	37.676	2.11e-155
Q4AEF8;D4A4V0	Coatomer subunit gamma	Copg	17	28.4	97.613	0
Q4FZT9	26S proteasome non-ATPase regulatory subunit 2	Psmd2	19	28	100.19	3.63e-259
Q4G079		Aimp1	7	33.3	34.574	1.6e-194
Q4KLL7		Vps4b	5	14.4	49.451	4.02e-99
Q4KLP0;D3ZZJ9;F1LQZ8	Probable 2-oxoglutarate dehydrogenase E1 component DHKTD1, mitochondrial	Dhtkd1;LOC100362392	6	9.1	102.64	3.88e-35
Q4KLZ6	Bifunctional ATP-dependent dihydroxyacetone kinase/FAD-AMP lyase (cyclizing);ATP-dependent dihydroxyacetone kinase;FAD-AMP lyase (cyclizing)	Dak	25	47.9	59.443	0
Q4KM62	Palmdelphin	Palmd	5	16.9	62.418	5.27e-21
Q4KM73;D3ZX23	UMP-CMP kinase	Cmpk1	11	66.3	22.169	8.54e-75
Q4KM74	Vesicle-trafficking protein SEC22b	Sec22b	10	55.8	24.74	2.89e-149
Q4V7E8;D3ZT35;D4A5G3;F1LVF2	Leucine-rich repeat flightless-interacting protein 2	Lrrfip2	4	11.4	49.772	2.37e-39
Q4V8H5		Dnpep	14	40.2	52.555	2.59e-234
Q4V8I5	ADP-ribosylation factor-like protein 6-interacting protein 4	Arl6ip4	4	26	25.769	6.16e-48
Q505J8	Phenylalanine--tRNA ligase alpha subunit	Farsa	14	31.5	57.719	0
Q505J9;Q7TP35	ATPase family AAA domain-containing protein 1	Atad1	4	14.7	40.717	4.16e-26
Q562C4	Methyltransferase-like protein 7B	Mettl7b	10	33.6	27.904	8.58e-115
Q58FK9;G3V827;Q08415;Q08415-2;D4A0T4;D4A635;F1M572	Kynurenine--oxoglutarate transaminase 3	Ccbl2	10	26	51.044	1.12e-103
Q5BJN1		Stard10	4	19	32.904	1.43e-21
Q5BJN7;P62864	40S ribosomal protein S30	Fau	2	8.3	14.372	1.19e-08
Q5BJT0;D3ZE69	Arginine and glutamate-rich protein 1	Arglu1	11	29.9	32.887	3.42e-25
Q5BJZ3;D3ZBZ4		Nnt	3	3.3	113.87	5.75e-07
Q5D059;P61980	Heterogeneous nuclear ribonucleoprotein K	Hnrnpk	7	18.5	51.028	7.63e-182
Q5EBC0;D3ZFC6		Itih4	8	10.5	103.75	6.16e-33
Q5EBD0;Q99MS0	SEC14-like protein 2	Sec14l2	5	13.4	46.205	1.67e-19
Q5FVR5;D3ZYP4	Acyl-coenzyme A amino acid N-acyltransferase 2	Acnat2;Acnat1	7	22	46.01	3.38e-84
Q5HZE4	Methylthioribose-1-phosphate isomerase	Mri1	8	16.5	39.587	6.08e-30
Q5HZY2;Q6AY18	GTP-binding protein SAR1b	Sar1b;Sar1a	3	15.2	22.41	3.02e-07
Q5I0M2	Nicotinate-nucleotide pyrophosphorylase [carboxylating]	Qprt	5	18.1	31.297	2.17e-36
Q5I0N4;Q62730	Estradiol 17-beta-dehydrogenase 2	Hsd17b2	2	7.6	42.039	5.92e-09
Q5M7U6;D3ZEA6;D3ZEF5	Actin-related protein 2	Actr2	13	37.6	44.733	2.06e-116
Q5M7V8;F1M3B8	Thyroid hormone receptor-associated protein 3	Thrap3	6	9.1	108.25	5.72e-23
Q5M849		Ifi35	5	20.6	31.764	1.54e-71
Q5M875;D3ZHH7;D4A675	17-beta-hydroxysteroid dehydrogenase 13	Hsd17b13	9	30.3	33.494	7.96e-100
Q5M884		Eci3	12	40.6	33.686	5.44e-71
Q5M9G3;D3ZG41	Caprin-1	Caprin1	8	13.4	78.12	8.66e-95
Q5M9H2;D3ZMF5;P45953	Very long-chain specific acyl-CoA dehydrogenase, mitochondrial	Acadvl	13	24.3	70.821	1.5e-127
Q5PPL3	Sterol-4-alpha-carboxylate 3-dehydrogenase, decarboxylating	Nsdhl	9	21.5	40.411	3.15e-35
Q5PQM2;D3ZFI4	Kinesin light chain 4	Klc4	8	16.3	68.963	3.66e-73
Q5PQU1;P01048	T-kininogen 1;T-kininogen 1 heavy chain;T-kinin;T-kininogen 1 light chain	Kng1;Map1	3	13.3	47.764	1.49e-21
Q5RJR2	Twinfilin-1	Twf1	7	28.9	40.09	3.41e-90
Q5RJR8	Leucine-rich repeat-containing protein 59	Lrrc59	8	26.4	34.869	1.19e-36
Q5RK30	Ribosome maturation protein SBDS	Sbds	3	15.2	28.752	2.05e-120
Q5RKH2		Galk1	16	35.7	42.376	1.02e-221
Q5RKH9		Derl1	2	7.6	28.834	2.36e-05
Q5RKI0	WD repeat-containing protein 1	Wdr1	22	50.8	66.181	0
Q5RKI5		Flii	10	12.4	144.86	2.49e-67
Q5U2S7;D4A341		Psmd3	21	37.2	60.687	0
Q5U2U5		Plin2	6	18.2	46.263	2.32e-42
Q5U2U8		Bag3	5	9.4	61.49	1.24e-39
Q5U300	Ubiquitin-like modifier-activating enzyme 1	Uba1	7	9.1	117.79	3.04e-16
Q5U302;D4A6H8		Ctnna1	13	21	100.24	2.87e-212
Q5XFW8	Protein SEC13 homolog	Sec13	4	15.8	35.547	4.22e-86
Q5XI26		Stat2	7	8.4	96.856	1.08e-31
Q5XI32;D3ZPF3;D3Z8M9;F1M1E3	F-actin-capping protein subunit beta	Capzb	13	40.4	30.628	4.94e-122
Q5XI34;D4A1Y3;Q4QQT4		Ppp2r1a	13	25.3	65.322	2.31e-209
Q5XI55;Q5XI55-2;F1LLZ5	Peptide-N(4)-(N-acetyl-beta-glucosaminyl)asparagine amidase	Ngly1	9	14.6	74.676	3.51e-20
Q5XI73	Rho GDP-dissociation inhibitor 1	Arhgdia	3	23.5	23.407	4.19e-12
Q5XIC0	Enoyl-CoA delta isomerase 2, mitochondrial	Eci2	3	9.5	43.021	1.08e-43
Q5XIC1	Mannose-1-phosphate guanyltransferase alpha	Gmppa	5	13.3	46.191	1.08e-17
Q5XIC6;D3Z8B3;D3Z936		Psmd12	11	28.5	52.936	7.88e-126
Q5XIF6	Tubulin alpha-4A chain	Tuba4a	8	16.1	49.924	0
Q5XIG6	N-acetylgalactosamine kinase	Galk2	4	8.7	50.197	7.21e-16
Q5XIH7;D4A278	Prohibitin-2	Phb2	7	26.4	33.312	6.36e-18
Q5XIM9	T-complex protein 1 subunit beta	Cct2	13	30.7	57.458	1.71e-121
Q60587	Trifunctional enzyme subunit beta, mitochondrial;3-ketoacyl-CoA thiolase	Hadhb	11	33.5	51.414	1.85e-66
Q62669		MGC72973	7	63.3	16.022	4.33e-90
Q62991;D3ZNA2;D3ZYJ4;F1LT51	Sec1 family domain-containing protein 1	Scfd1	9	22.4	72.262	3.42e-111
Q63041	Alpha-1-macroglobulin;Alpha-1-macroglobulin 45 kDa subunit	A1m	19	14.3	167.12	6.37e-186
Q63081	Protein disulfide-isomerase A6	Pdia6	11	29.3	48.173	1.79e-145
Q63150	Dihydropyrimidinase	Dpys	15	35.5	56.814	1.34e-234
Q63228;D3ZTK6;F1LS90	Glia maturation factor beta	Gmfb	7	40.1	16.736	9.14e-86
Q63276	Bile acid-CoA:amino acid N-acyltransferase	Baat	16	48.6	46.464	0
Q63355;D4A5Q0;F1LQH7;D3ZVF7	Unconventional myosin-Ic	Myo1c	5	7.3	119.81	9.9e-28
Q63356;F1LS04;D4A7X9;F1M3K9	Unconventional myosin-Ie	Myo1e	4	3.8	126.83	1.98e-13
Q63357;D3ZKZ9;F1LQ75	Unconventional myosin-Id	Myo1d	22	29.3	116.09	4.47e-216
Q63396	Activated RNA polymerase II transcriptional coactivator p15	Sub1	8	51.2	14.441	2.83e-27
Q63570;F1LZ09	26S protease regulatory subunit 6B	Psmc4	22	49.8	47.408	1.23e-212
Q63584;F1LYL3;F1LWT3	Transmembrane emp24 domain-containing protein 10	Tmed10	4	21.5	24.857	3.31e-16
Q63610-2;Q63610-3;F2Z3T2		Tpm3	2	11.7	28.72	0
Q63610;F1LRP5;F1M931;Q9QX07	Tropomyosin alpha-3 chain	Tpm3	9	27.4	29.006	0
Q63716	Peroxiredoxin-1	Prdx1	13	50.3	22.109	3.73e-122
Q63798	Proteasome activator complex subunit 2	Psme2	3	16	26.857	3.52e-53
Q63910		LOC287167	4	36.6	15.524	1.19e-17
Q64057	Alpha-aminoadipic semialdehyde dehydrogenase	Aldh7a1	13	27.5	58.748	2.57e-49
Q641X8	Eukaryotic translation initiation factor 3 subunit E	Eif3e	2	7	52.22	8.45e-19
Q641Y8	ATP-dependent RNA helicase DDX1	Ddx1	10	14.9	82.496	5.17e-126
Q641Z6;F8WFQ1;Q4V8H8	EH domain-containing protein 1	Ehd1	11	34.1	60.602	1.11e-245
Q64232	Trans-2,3-enoyl-CoA reductase	Tecr	4	8.1	36.122	5.15e-11
Q642A9;D3ZZ36		Vps16	2	3.9	94.906	4.95e-22
Q642E2;D3ZJD3;D3ZEI0;P17702;D3ZG08;D4A8B6;Q6TUD7	60S ribosomal protein L28	Rpl28;LOC100362069;LOC690096;RGD1565183	16	67.2	15.733	1.45e-126
Q64428;F1M9X9	Trifunctional enzyme subunit alpha, mitochondrial;Long-chain enoyl-CoA hydratase;Long chain 3-hydroxyacyl-CoA dehydrogenase	Hadha	22	27.7	82.664	4.13e-171
Q64550;Q6T5F2;Q6T5E8;Q6T5F0;Q6T5F1;Q6T5E7;Q6T5F3;F1MA28;P20720;Q64633;Q64637;Q64638;Q64634	UDP-glucuronosyltransferase 1-1;UDP-glucuronosyltransferase 1-2;UDP-glucuronosyltransferase 1-7;UDP-glucuronosyltransferase 1-3;UDP-glucuronosyltransferase 1-5;UDP-glucuronosyltransferase 1-8	Ugt1a1;Ugt1a2;Ugt1a7c;Ugt1a3;Ugt1a8;Ugt1a9;Ugt1	2	5	59.662	3.88e-19
Q64602	Kynurenine/alpha-aminoadipate aminotransferase, mitochondrial	Aadat	10	25.4	47.784	1.35e-102
Q64611;F1LPX2	Cysteine sulfinic acid decarboxylase	Csad	15	36.7	55.248	9.95e-86
Q64620	Serine/threonine-protein phosphatase 6 catalytic subunit	Ppp6c	3	10.8	35.159	6.76e-10
Q64640	Adenosine kinase	Adk	7	17.2	40.133	1.38e-26
Q66H80	Coatomer subunit delta	Arcn1	11	24.9	57.199	5.26e-41
Q66HD0;Q66HD0-2;D3ZUA3	Endoplasmin	Hsp90b1	26	35.8	92.77	0
Q66HM2;P18484;D4A101	AP-2 complex subunit alpha-2	Ap2a2	13	15.2	104.17	4.41e-174
Q66X93;D4A8Y5;D3ZH86	Staphylococcal nuclease domain-containing protein 1	Snd1	11	17.3	101.95	1.67e-96
Q68FP2	Serum paraoxonase/lactonase 3	Pon3	3	10.7	39.458	2.47e-14
Q68FQ0	T-complex protein 1 subunit epsilon	Cct5	17	37.5	59.536	1.15e-201
Q68FR6;F1M5E1	Elongation factor 1-gamma	Eef1g	11	24	50.06	2.49e-33
Q68FS1	Cytosolic Fe-S cluster assembly factor NUBP2	Nubp2	3	13.3	28.926	1.06e-24
Q68FS4;Q68FS4-2	Cytosol aminopeptidase	Lap3	10	25	56.149	1.87e-56
Q68FT7		Farsb	8	14.9	65.651	1.3e-51
Q68FU3	Electron transfer flavoprotein subunit beta	Etfb	9	42.4	27.687	1.32e-46
Q68G19;P36511	UDP-glucuronosyltransferase 2B15	Ugt2b15	4	13.6	61.026	4.34e-33
Q68G31	Phenazine biosynthesis-like domain-containing protein	Pbld	14	56.6	31.687	5.7e-288
Q6AXS5;Q6AXS5-2	Plasminogen activator inhibitor 1 RNA-binding protein	Serbp1	9	26.3	44.754	2.15e-100
Q6AXW2;P70566		Tmod3	18	54.8	39.471	0
Q6AY30;D4A8I1	Saccharopine dehydrogenase-like oxidoreductase	Sccpdh	3	8.2	47.088	2.94e-06
Q6AY58		Bcap31	4	11	27.911	8.89e-10
Q6AYD5		Gspt1	6	9.7	68.751	5.81e-26
Q6AYH5	Dynactin subunit 2	Dctn2	12	43	44.147	2.2e-165
Q6AYI1;D4A9J1		Ddx5	19	30.7	69.238	3.78e-166
Q6AYK6	Calcyclin-binding protein	Cacybp	3	8.7	26.541	2.79e-11
Q6AYK8	Eukaryotic translation initiation factor 3 subunit D	Eif3d	4	10.8	63.988	1e-43
Q6AYS7;Q6PTT0	Aminoacylase-1A	Acy1a	12	30.9	45.804	1.6e-50
Q6AYS8	Estradiol 17-beta-dehydrogenase 11	Hsd17b11	3	15.1	32.937	4.38e-14
Q6AYT3	tRNA-splicing ligase RtcB homolog		18	41	55.249	1.51e-293
Q6AYW2;P04176	Phenylalanine-4-hydroxylase	Pah	26	56.3	51.819	0
Q6DGG1;F1M2R0;F1M5R3	Abhydrolase domain-containing protein 14B	Abhd14b	9	46.2	22.618	1.68e-178
Q6I7R1		Dhrs7	3	9.3	36.402	2.81e-56
Q6IMY8		Hnrnpu	14	18.5	87.731	6.41e-175
Q6IN39;P97852	Peroxisomal multifunctional enzyme type 2;(3R)-hydroxyacyl-CoA dehydrogenase;Enoyl-CoA hydratase 2	Hsd17b4	23	34	81.088	6.78e-215
Q6IRH6;G3V741;P16036	Phosphate carrier protein, mitochondrial	Slc25a3	2	6.2	39.621	2.82e-10
Q6IRS8;Q62818	Translation initiation factor eIF-2B subunit beta	Eif2b2	2	7.4	38.842	6.57e-30
Q6MG08;F1LQF0	ATP-binding cassette sub-family F member 1	Abcf1	4	8.6	95.251	5.1e-155
Q6MG49;D3ZX75;Q6MG49-2	Large proline-rich protein BAG6	Bag6	20	23.2	120.01	5.94e-130
Q6P0K8	Junction plakoglobin	Jup	15	23	81.8	4.23e-44
Q6P3V8		Eif4a1	11	26.1	46.153	0
Q6P3V9;P50878	60S ribosomal protein L4	Rpl4	32	51.8	47.3	0
Q6P502;F1M1I0	T-complex protein 1 subunit gamma	Cct3	27	53.8	60.646	3.32e-290
Q6P685;D3ZBJ7		Eif2s2	4	11.4	38.243	8.31e-14
Q6P6U2;Q63569;D3ZF94;D3ZL65	26S protease regulatory subunit 6A	Psmc3	24	56.1	49.548	2.31e-255
Q6P7B0;F8WFH8	Tryptophan--tRNA ligase, cytoplasmic;T1-TrpRS;T2-TrpRS	Wars	7	22.7	54.143	1.35e-171
Q6P7R8;D3ZPU3	Estradiol 17-beta-dehydrogenase 12	Hsd17b12	6	18.3	34.84	1.31e-15
Q6P9U0		Serpinb6	4	12.7	43.018	1.2e-24
Q6P9U8;D3ZL77	Eukaryotic translation initiation factor 3 subunit H	Eif3h	5	27.6	39.905	8.36e-71
Q6P9V7;Q63797;F1M0Q8;F1M5C5	Proteasome activator complex subunit 1	Psme1	4	18.9	28.635	1.35e-38
Q6PCT9		Psmd6	7	21.6	45.598	1.22e-71
Q6PDV7;D4A1P2;D3ZXN2	60S ribosomal protein L10	Rpl10;Rpl10l	21	67.8	24.604	2.62e-185
Q6PDV8;F1M3S4;D3ZSC4;P47198		LOC100363800;LOC100360057	6	30.5	14.759	2.91e-60
Q6PDW1;D3ZMD2;D3ZHB3;D3ZJZ4;P63324;F1M185;D3ZG05;D3ZV36;F1M8X3	40S ribosomal protein S12	LOC100359593;LOC100360558;LOC100360573;LOC100360642;Rps12	8	57.6	14.515	5.29e-63
Q6QI09;Q6PCU0;P35435	ATP synthase gamma chain;ATP synthase subunit gamma, mitochondrial	LOC100360100;Atp5c1	10	15.8	67.72	3.5e-101
Q6QI93;Q3ZAV8	Enhancer of mRNA-decapping protein 4	Edc4	11	10.7	163.25	5e-113
Q6T487;Q9Z1P2;Q6GMN8;F1M1N4	Alpha-actinin-1	Actn1	6	10	105.47	3.82e-148
Q6TMG5;F1LM08	NF-kappa-B essential modulator	Ikbkg	6	13.3	48.066	1.96e-32
Q6TXG7;Q4KLG7	Serine hydroxymethyltransferase	Shmt1	18	29.1	75.373	5.9e-198
Q71TY3;D3ZNZ8	40S ribosomal protein S27	Rps27;LOC100362405	3	15.5	9.461	3.22e-34
Q75N33;D3ZUF6;F1LNQ6;D4AAW2	Protein transport protein Sec16B	Sec16b	15	20.6	116.9	5.9e-105
Q793F9;Q6IRG3;Q6GX84	Vacuolar protein sorting-associated protein 4A	Vps4a	6	16.9	48.906	8.56e-31
Q794E4;F1LV61	Heterogeneous nuclear ribonucleoprotein F;Heterogeneous nuclear ribonucleoprotein F, N-terminally processed	Hnrnpf	4	13	45.729	1.08e-73
Q7M0E3;D4A315	Destrin	Dstn	6	35.8	18.533	6.52e-140
Q7TP42		Sec62	7	6.8	67.93	4.86e-22
Q7TP52	Carboxymethylenebutenolidase homolog	Cmbl	3	14.7	27.903	8.76e-20
Q7TP57;F1M9D6;F1M4K4		Stat4	24	23.9	134.61	0
Q7TPB1	T-complex protein 1 subunit delta	Cct4	15	36.5	58.099	3.89e-109
Q7TPJ1;A1L1K2		Igtp	13	16.1	161.63	2.38e-152
Q7TQ16	Cytochrome b-c1 complex subunit 8	Uqcrq	4	39	9.8492	3.76e-10
Q7TT49;G3V6C9;O54874;D3ZR44;D4A247	Serine/threonine-protein kinase MRCK beta	Cdc42bpb	10	7.2	194.89	3.31e-50
Q80Z29;D4A8T1;G8JLR4	Nicotinamide phosphoribosyltransferase	Nampt	25	45.2	55.437	0
Q8CFN2;Q8CFN2-2	Cell division control protein 42 homolog	Cdc42	3	22	21.258	1.47e-10
Q8CG45	Aflatoxin B1 aldehyde reductase member 2	Akr7a2	12	35.1	40.675	1.16e-51
Q8CHM7;F1M6X0	2-hydroxyacyl-CoA lyase 1	Hacl1	13	28.4	63.615	1.64e-208
Q8K4C0	Dimethylaniline monooxygenase [N-oxide-forming] 5	Fmo5	7	12.6	60.055	1.94e-54
Q8K4V4;G3V8U4;Q8K4V4-2	Sorting nexin-27	Snx27	4	10.9	61.014	8.15e-37
Q8R491;Q8R3Z7	EH domain-containing protein 3	Ehd3	10	28.2	60.79	9e-236
Q8SEZ5;P00406	Cytochrome c oxidase subunit 2	Mt-co2;Mtco2	4	19.4	25.928	8.85e-16
Q8VBU2;Q8VBU2-2	Protein NDRG2	Ndrg2	9	38.8	40.779	8.51e-171
Q8VIF7;F1LRJ9	Selenium-binding protein 1	Selenbp1	17	48.5	52.531	3.3e-100
Q91XR8;F8WFK6;P36970;P36970-2	Phospholipid hydroperoxide glutathione peroxidase, nuclear;Glutathione peroxidase;Phospholipid hydroperoxide glutathione peroxidase, mitochondrial	Gpx4	3	16.2	29.352	4.92e-13
Q920J4;D3ZW98	Thioredoxin-like protein 1	Txnl1	7	38.1	32.249	1.79e-105
Q920P0	L-xylulose reductase	Dcxr	7	35.2	25.719	9.5e-43
Q920R3	Fatty acid desaturase 1	Fads1	5	14.8	52.481	4.04e-19
Q923K9;Q923K9-2;F1LNL0;Q923K9-3;Q923K9-4;Q66H68;D3ZAE2	APOBEC1 complementation factor	A1cf	15	41.4	65.619	5.35e-152
Q99J82	Integrin-linked protein kinase	Ilk	13	27.7	51.373	3.39e-49
Q99ND5;P49890	Estrogen sulfotransferase, isoform 6	ste2	2	12.9	35.361	4.98e-41
Q99PD4;D4A992;D3ZXP7	Actin-related protein 2/3 complex subunit 1A	Arpc1a	9	31.1	41.599	8.92e-75
Q9EPH8;B5DF80;G3V9N0;D3ZSR2;D4AC14;D4A233;F1M8Y9	Polyadenylate-binding protein 1	Pabpc1;Pabpc3	3	6.6	70.7	4.43e-33
Q9EPJ0	Nuclear ubiquitous casein and cyclin-dependent kinases substrate	Nucks1	3	5.3	27.14	2.05e-09
Q9EPX0	Heat shock protein beta-8	Hspb8	6	33.2	21.592	9.81e-20
Q9EQ76;Q8K4B7;G3V6F2	Dimethylaniline monooxygenase [N-oxide-forming] 3	Fmo3	16	29.8	59.96	2.23e-61
Q9EQX9;D3ZUH7	Ubiquitin-conjugating enzyme E2 N	Ube2n	3	29.6	17.124	4.35e-15
Q9ER34;F1M0K2	Aconitate hydratase, mitochondrial	Aco2	3	5.6	85.432	5.1e-140
Q9ES38	Bile acyl-CoA synthetase	Slc27a5	20	27.5	76.265	8.14e-196
Q9JHL4;Q9JHL4-2;Q9JHL4-3;Q9JHL4-4	Drebrin-like protein	Dbnl	8	26.4	48.612	2.15e-155
Q9JJ19	Na(+)/H(+) exchange regulatory cofactor NHE-RF1	Slc9a3r1	8	28.9	38.83	1.43e-32
Q9JKB7;Q9WTT6	Guanine deaminase	Gda	14	37.9	50.9	6.3e-192
Q9JMB5;D3ZS63	Proteasomal ubiquitin receptor ADRM1	Adrm1	2	7.6	42.102	2.34e-28
Q9QUH3	Apolipoprotein A-V	Apoa5	6	28.1	41.426	3.67e-87
Q9QXQ0;Q8R4I6;D3ZCV0	Alpha-actinin-4	Actn4	23	34.7	104.91	0
Q9QYL8	Acyl-protein thioesterase 2	Lypla2	4	13.4	24.807	7.43e-09
Q9QYU4	Thiomorpholine-carboxylate dehydrogenase	Crym	7	25.9	33.554	1.03e-58
Q9QZA2;F1LLY4	Programmed cell death 6-interacting protein	Pdcd6ip	24	32.6	96.63	6.91e-135
Q9QZU7	Gamma-butyrobetaine dioxygenase	Bbox1	6	14	44.545	8.17e-20
Q9R063;D3ZEN5;Q9R063-2	Peroxiredoxin-5, mitochondrial	Prdx5	6	35.7	22.178	4.98e-11
Q9R0T3	DnaJ homolog subfamily C member 3	Dnajc3	7	16.5	57.56	1.98e-25
Q9WU49	Calcium-regulated heat stable protein 1	Carhsp1	4	59.9	15.906	3.23e-26
Q9WU74;Q9WU74-2;Q9WU74-3	Lipolysis-stimulated lipoprotein receptor	Lsr	5	11.8	65.776	2.08e-20
Q9WU82	Catenin beta-1	Ctnnb1	6	12	85.454	4.57e-35
Q9WUC4	Copper transport protein ATOX1	Atox1	2	32.4	7.2924	2.15e-12
Q9WVJ6		Tgm2	24	37.2	76.934	5.08e-259
Q9WVK3	Peroxisomal trans-2-enoyl-CoA reductase	Pecr	8	36.3	32.433	4.73e-51
Q9WVK7	Hydroxyacyl-coenzyme A dehydrogenase, mitochondrial	Hadh	5	11.8	34.447	6.25e-08
Q9Z122;F1LNU6	Fatty acid desaturase 2	Fads2	6	17.3	52.38	8.62e-19
Q9Z2M4	Peroxisomal 2,4-dienoyl-CoA reductase	Decr2	4	10.6	31.292	1.81e-48
Q9Z339;Q6AXR6;D3ZJM9;Q6AXV9	Glutathione S-transferase omega-1	Gsto1	8	35.7	27.669	5.88e-71

## Sheet: HFD+Insulin
Protein.IDs	Protein.names.HFDI	Gene.names	Unique.Peptides	Unique.Sequence.Coverage	Molecular.Weight.kDa	PEP
A0JPJ7;D3ZG25	Obg-like ATPase 1	Ola1	3	7.8	44.535	6.99e-09
B0BMS8;Q64122	Myosin regulatory light polypeptide 9	Myl9	4	21.5	19.854	1.43e-212
B0BMW0;P61107	Ras-related protein Rab-14	Rab14	4	31.6	23.897	2.08e-53
B0BN52;D3ZNM9;F1M3F5		Mtch2	3	10.6	33.528	2.42e-05
B0BN81;P24050	40S ribosomal protein S5;40S ribosomal protein S5, N-terminally processed	Rps5	12	49.5	22.906	9.17e-85
B0BN93	26S proteasome non-ATPase regulatory subunit 13	Psmd13	12	38	42.817	2.88e-103
B0BNA7;F1LR46;F1LUP5	Eukaryotic translation initiation factor 3 subunit I	Eif3i	7	20.9	36.46	1.13e-27
B0BNE5	S-formylglutathione hydrolase	Esd	5	15.2	31.363	1.38e-17
B0BNF9		Hao1	8	27.6	40.968	1e-50
B0K031;P05426;F1M6K0;F1M087;D4A1F7;Q7TP62;D4A4I8;F1LTQ3;F1M1V2;F1LXU1;F1LUE9;F1LWQ5;F1LV62	60S ribosomal protein L7	Rpl7	27	60.4	30.313	2.08e-153
B1H267	Sorting nexin-5	Snx5	4	14.1	46.793	6.51e-39
B1WBY7		Erlin1	2	7.5	39.266	1.58e-24
B1WC26		Nans	4	17.5	40.051	9.58e-42
B2GUY2;D4A1F1	Transferrin receptor protein 2	Tfr2	5	6.5	88.327	1.81e-16
B2GUZ5;F8WFI5	F-actin-capping protein subunit alpha-1	Capza1	7	36.4	32.909	1.1e-115
B2GV15		Dbt	10	17.8	53.273	8.46e-37
B2GV38	Ubiquitin-like protein 4A	Ubl4a	7	47.8	17.79	2.4e-30
B2RYG6	Ubiquitin thioesterase OTUB1	Otub1	2	12.5	31.27	1.89e-50
B2RYH2;D3ZBI1		Trim14	7	17.3	49.849	3.75e-26
B2RYI2;D3ZVL3		Srp68	13	30.9	70.491	2.32e-177
B2RYN3		Eef1e1	3	19.5	19.842	1.73e-32
B2RYP4		Snx2	4	8.5	58.53	1.38e-19
B2RZ72		Arpc4	7	48.8	19.667	3.98e-60
B2RZA9;F1LTT5		Ube2l3	4	42.2	17.861	2.32e-109
B2RZD1		Sec61b	2	27.1	9.9884	1.6e-26
B2RZD4;D4A4W9;F1LQ14;P11250;D3ZHM1	60S ribosomal protein L34	Rpl34;Rpl34-ps1;RGD1561086	7	33.3	13.293	4.41e-20
B2RZD6		Ndufa4	5	47.6	9.3267	1.37e-16
B3DMA2;F1LYZ0	Acyl-CoA dehydrogenase family member 11	Acad11	16	20.2	87.37	8.62e-63
B5DEG8;F1LYY0;F1M7Y8		Sec24c	9	12.7	118.52	3.83e-52
B5DEM5;F1LSW7;Q63507;Q6TUH8;D3ZHE6;D3ZZY6	60S ribosomal protein L14	Rpl14;LOC306079;LOC680579	10	39.7	23.78	1.96e-43
B5DEN5;Q7TPK5		Eef1b2	3	16	24.675	3.79e-34
B5DF46		Pmm2	8	34.7	27.708	3.08e-29
B5DF60;Q6VV72	Eukaryotic translation initiation factor 1A	Eif1ax;Eif1a	2	15.3	16.46	1.7e-12
B5DF65		LOC681468	4	25.2	22.094	3.67e-11
B5DFC3		Sec23a	13	24.1	86.161	0
B5DFC8;D3ZX16	Eukaryotic translation initiation factor 3 subunit C	Eif3c	10	12.4	105.43	7.7e-140
D3Z8I7		Gstt1	8	25.2	23.381	9.16e-207
D3Z8X6		Dtx3l	19	27.9	83.102	1.07e-125
D3Z905;G3V699;Q9Z2Q1;D4A5M5;Q9Z2Q1-2;D4ADQ9;D3Z9R0	Protein transport protein Sec31A	Sec31a	30	29.1	133.43	0
D3Z941		Mars	19	27.1	101.58	5.37e-124
D3Z982;Q6PDU1;F1LUT2	Serine/arginine-rich splicing factor 2	Srsf2	7	26.6	28.869	1.1e-137
D3Z9M4;F1M651;F1M3K5;F1MA94;D3ZMF0;D3Z9Z0		Ank1	7	6	207.49	3.86e-55
D3ZAF6		Atp5j2	3	34.1	10.452	1.53e-07
D3ZAP2;C0JPT7;D3ZXX2		Flna	38	19.8	281.29	0
D3ZBA1;D3ZJP8;E9PSW4;E9PTJ9		Aox4	32	29.7	146.93	0
D3ZBW0;D4A2X2;Q05096;F1LSW1;D3ZC71;Q05096-2;D3ZNP7;Q05096-3	Unconventional myosin-Ib	Myo1b	20	21.3	132.02	5e-169
D3ZC88;P62630;F1M6C2;P62632;D3ZA96;D4A0X4	Elongation factor 1-alpha;Elongation factor 1-alpha 1	LOC100360413;Eef1a1	19	42.6	50.107	0
D3ZCS9		RGD1309350	5	34	16.01	1.69e-28
D3ZD13;D4A8D5;D3ZHA0;D3ZZ63		Flnb	61	32.1	277.84	0
D3ZDW1;D3ZIC2		Uroc1	15	22.4	78.533	1.3e-96
D3ZE37;P62282;D3ZYK5;D3ZMX7	40S ribosomal protein S11	Rps11	16	60.6	18.701	7.46e-90
D3ZE63;P30904;D4A3P7;F1LTZ6	Macrophage migration inhibitory factor	LOC686548;Mif;RGD1560513	3	23.5	12.605	1.94e-14
D3ZEZ9;F1M155;D3ZQS5		Svil	6	5	241.94	7.18e-27
D3ZF07;P18445;D3ZI60;D3ZG03;D4AAY6;D3ZUK0;F1M5H4;F1LVD0;D3ZVI3;F1LZW1	60S ribosomal protein L27a	RGD1562402;Rpl27a;RGD1561984	6	32.4	16.587	1.23e-25
D3ZF33;D4AAS7;P04799;P00185	Cytochrome P450 1A2	Cyp1a2	3	9.5	58.006	6e-26
D3ZFA8;P04644;D3ZHU9;D3ZKG6;D3ZM01;F1M5B1;F1M238;D3ZL23	40S ribosomal protein S17	LOC100362366;Rps17;LOC100361180;RGD1559955	10	65.2	15.468	2.47e-144
D3ZFB2;D4A371		Luc7l3	4	6.7	58.423	5.38e-12
D3ZFF9;D3ZUL6;G3V9U0;D3ZQ17		Acss2	7	12.3	80.583	6.22e-92
D3ZFY0		Sephs1	6	28.3	42.892	1.52e-35
D3ZGE6;D3ZRB0;Q66HL2		Cttn	18	39.7	61.077	1.77e-108
D3ZHX7;D3Z8U7;F1LQB5;Q5M7W5;D3ZHY7;D3ZHX8;Q5M7W5-2	Microtubule-associated protein;Microtubule-associated protein 4	Map4	6	7.9	116.81	5.59e-33
D3ZHY1;Q5XHY5;D4ABM0;Q68FW7;F1LQP2;D3Z7Y7	Threonine--tRNA ligase, cytoplasmic	Tars	24	33	83.388	2.42e-299
D3ZI23;G3V9P0;Q9WTV5;D4A4H7	26S proteasome non-ATPase regulatory subunit 9	Psmd9	5	18	31.758	7.18e-21
D3ZIA3;F1LN56;Q99MZ8	LIM and SH3 domain protein 1	Lasp1	13	41.8	29.942	5.75e-111
D3ZJ95;Q7TQ70;P06399;P06399-2;F1M5M0	Fibrinogen alpha chain;Fibrinopeptide A;Fibrinogen alpha chain	Fga	32	39.2	86.846	0
D3ZJI3;Q6P799;D3ZJ61;D4A0E9	Serine--tRNA ligase, cytoplasmic	Sars	2	3.5	61.362	2.87e-05
D3ZJS0;P70580	Membrane-associated progesterone receptor component 1	Pgrmc1	8	28.4	24.694	1.59e-113
D3ZK05		Gsdmd	9	24.4	49.603	2.39e-70
D3ZK97;D3ZQN4;P84245;D3ZJ08;Q6LED0;D4A0P4;D3ZVW5;F1M7I7	Histone H3;Histone H3.3;Histone H3.1	LOC100360868;LOC100359421;H3f3b;Hist1h2ail;LOC691496	7	43.4	15.358	1.57e-16
D3ZKG9;F1M0Y0		RGD1307222	13	10.5	151.04	7.72e-152
D3ZL58;Q5XIT4		Nub1	4	10.3	70.296	1.85e-71
D3ZLI8;Q07984	Translocon-associated protein subunit delta	Ssr4	4	30.5	19.107	1.58e-13
D3ZLR7;D4ADT6;D4A8D9;D4ADT5		Ddx58	28	31	106.3	4.69e-173
D3ZNH4;F1LS18;D3ZWM5;G3V8B3;D4A817;Q00715;D4ABS3;D3ZLY9;D3Z8U0;G3V9C7;Q00729;F1LP73;D3ZNZ9;D3ZZP9	Histone H2B;Histone H2B type 1;Histone H2B type 1-A	Hist1h2bm;Hist1h2bl;LOC684647;LOC684797;LOC100359692;Hist1h2bd;Hist1h2bf;Hist1h2bc;Hist1h2ba;Hist3h2ba	12	58.7	15.493	3.16e-116
D3ZNQ6		Ube2m	2	10.4	20.9	4.13e-07
D3ZNU8;D4A678;Q6XDA1;REV__F1LLV5		Spta1	108	47.2	280.13	0
D3ZP30;F1LQI5;Q2TL32;D3ZZA2	E3 ubiquitin-protein ligase UBR4	Ubr4	13	3.3	575.56	1.59e-161
D3ZPN7;Q6PDW2;D4A4G9;D3ZMI8;D3ZXP5;D3ZZH9;D3Z9G3;D3ZEK2;D3ZUH0;D3ZEP1;P20280;F1LWH4;D4A7B4;D4A870;D3ZPH0;D3ZRA9;D3ZLH3;D4A219;D4A4G7;D3ZPU6;F1LY43;F1LVT4;D3ZE97;D3ZPV5;F1LV87;F1LXP6;D3ZIM9;F1LV39;D3ZKL4;D4A4U4;F1M5C7;D4A9T8;D3ZPB0;D3ZQD7;F1M361;F1M235;D3ZF08;D4A5A5;D3ZCN5;D3ZVH3;D3ZM68;F1M4U3;D3ZNN2	60S ribosomal protein L21	LOC100364176;LOC100360604;RGD1561815;RGD1562839;RGD1562469;LOC681195;LOC100361103;RGD1562923;LOC100363471;RGD1562971;Rpl21;LOC100360611;LOC686080;RGD1565370;RGD1560414;RGD1562601;RGD1565159;RGD1566270;LOC680639;RGD1564634;RGD1566326;RGD1562929	4	23.1	18.678	7.75e-86
D3ZPR0		Cse1l	9	9.5	110.21	1.98e-85
D3ZQX6;Q9EQS4		Cth	2	13.6	43.59	0
D3ZR07;D3ZFD0;F1LM91;F1M5K8;F1LNC1;D3ZHN6			138	57.2	234.36	0
D3ZRJ1;F1M7X1;P20817;D3ZNF2;D3ZMB7;D4A756;D4AB65;D3ZTC9;P24464;D3ZXY6	Cytochrome P450 4A14	Cyp4a2;Cyp4a14	3	9.9	58.465	1.31e-70
D3ZRV4;P04905;G3V983;D3ZGW4;D3ZVQ8;B0BN47	Glutathione S-transferase Mu 1	Gstm1	11	35.4	28.399	1.11e-138
D3ZS68;D4A1P3;Q6AY48;D3ZPF1;F1LU04;D3ZCS3;D3ZWQ9;F1M8T3		Pcbp1	7	30.3	37.497	1.04e-223
D3ZT90		Gcdh	7	25.7	49.713	4.96e-152
D3ZTH8;F1LT35;P62752;D4AAL7;D3ZTX9;D3ZNM1;D3ZFK7;D3ZSR8;D4A9L3;F1M1E5;D4ADV3;D3Z969;D3ZIJ2	60S ribosomal protein L23a	LOC689899;RGD1564606;Rpl23a;LOC688776;RGD1565170;RGD1562755	10	44.2	17.753	1.17e-129
D3ZTP0;REV__D4A4I9		Aldh1l2	16	21.8	101.69	3.02e-119
D3ZTT9;P61928;D3ZTX8;D4A201;D4A7Z2	Ribosomal protein L37;60S ribosomal protein L37	Rpl37-ps1;Rpl37;RGD1561310;RGD1560186	3	28.9	11.115	7.68e-08
D3ZU13;D4AD15		Eif4g1;LOC680559	9	6.4	175.7	2.91e-33
D3ZU22;P62425;F2Z3S2;D3ZPL5;D4A6B9;F1M2H8;D3ZJH5;D3ZWM2;F1M1M2;F1M2Q3;D4A8X2;F1M394;F1M4C7;D3ZNA3;F1M300;F1LYB8;F1LU72;F1M0S7;F1M0R8;F1M4Z6;D4A566;F1LZY4;D3ZD15;Q7TQ86;F1M465;D3ZVY2;F1LV49;D4A2J1;F1LT34;D4A479;D4A1S7;F1M3Q8;F1M843;F1LXH6;F1M289;D4AE05;D3ZEB2	60S ribosomal protein L7a	LOC100361311;Rpl7a;RGD1562953;LOC680161;RGD1562409;RGD1559149;RGD1563220;RGD1564370	14	34.6	30.011	1.32e-160
D3ZU44;D4A644;D3ZAY9		Map7d1	2	3.8	93.601	1.74e-18
D3ZUM0;Q01579		Gstt1	12	47.3	27.598	1.3e-206
D3ZUU8		Sec14l4	7	20.4	47.018	1.9e-36
D3ZUY6;F1LM69;Q641Y0;D4AB95	Dolichyl-diphosphooligosaccharide--protein glycosyltransferase 48 kDa subunit	Ddost	4	9.5	48.555	2.16e-09
D3ZUY8;D3ZMB9		Ap2a1	4	5.2	107.67	2.64e-42
D3ZV91		RGD1305721	4	15.3	37.914	2.8e-14
D3ZVQ0	Ubiquitin carboxyl-terminal hydrolase	Usp5	3	5	95.778	8.71e-12
D3ZVZ4;P07150	Annexin;Annexin A1	Anxa1	2	4.9	43.592	2.19e-05
D3ZW08		Adsl	6	21.5	54.852	8.75e-68
D3ZW50;Q63448;F1M9A7;D4A3R1;REV__F1LW22;REV__F1M8V4	Acyl-coenzyme A oxidase;Peroxisomal acyl-coenzyme A oxidase 3	Acox3	18	32.3	78.569	2.93e-277
D3ZW55	Inosine triphosphate pyrophosphatase	Itpa	5	24.2	21.927	1.56e-20
D3ZXH6;P24049;D3ZP66;D3Z9G9;D4AAE8;D4ACF0;Q7TPJ7;F1M302;F1LZX7;F1M5Y4	60S ribosomal protein L17	RGD1563903;Rpl17;RGD1562905;RGD1560017;RGD1565093	16	47.6	22.025	0
D3ZXY4		Aldh8a1	23	45.8	53.46	0
D3ZYU9;G3V9S9;D3ZTC8		Sec24d;Sec24d_predicted	4	5.7	113.16	5.09e-26
D3ZZ12;B5DFH4;F1M318		Papss2	34	44.9	69.956	0
D3ZZ45			2	7.1	13.138	6.05e-05
D3ZZ55;D3ZZZ9;D4A493;D4ABK8		Ctnnd1	6	9.8	104.89	1.13e-25
D3ZZ95;P39032;D4A1Q0;F1M706;D3ZJJ6;D3Z7Z2;D3Z8V5;F1M9S4	60S ribosomal protein L36	LOC100361060;Rpl36;LOC100361079;LOC100360439;LOC100359616	7	39.6	12.41	2.33e-48
D3ZZB2;D3ZS45		Pex1	14	16.1	141.4	3.25e-171
D3ZZK1;P60868	40S ribosomal protein S20	LOC100359563;Rps20	7	37.8	13.354	8.39e-245
D3ZZN4;P04646;D3ZRV7;D4A771;F1M2L1;D4A329;D3ZYY1;F1M0T2;D3ZFY4	60S ribosomal protein L35a	LOC100362338;Rpl35a;LOC100359636;LOC100359825;RGD1560900	9	49.1	12.623	2.2e-27
D3ZZU0;P85970	Actin-related protein 2/3 complex subunit 2	Arpc2	9	30	34.347	3.89e-47
D4A133		Atp6v1a	10	25	68.264	6.51e-160
D4A137;D3ZIM4;D3ZJP0;G3V9W6;P30839;D4A387;P11883	Aldehyde dehydrogenase;Fatty aldehyde dehydrogenase	Aldh3a2	18	42.6	56.842	1.75e-203
D4A1M8;D4A3Q5;B2RYB3;D3ZD33		Srrm1	3	4.3	106.69	2.3e-13
D4A1Y4;D4A5T0;Q5XI21		Tom1	5	15.9	56.708	8.06e-24
D4A2K1		Hoga1	5	23.4	34.464	6.22e-74
D4A323;Q6S3A0;F1MAL6;D3ZF79;Q6S396;Q6S395;Q6S398;Q6S3A3;Q6S3A1;P30427;P30427-4;P30427-2;P30427-3	Plectin	Plec	108	27.8	534.37	0
D4A354;D3ZCI0;D3ZNG1;F1LSY6;Q63060;D3Z8F7;Q68FP7	Glycerol kinase	Gk	15	28.4	61.232	1.6e-109
D4A3E2		Npepl1	6	20.6	55.911	2.62e-124
D4A4D5;P02401;D3ZN03;D3ZMC4;D3ZMC5	60S acidic ribosomal protein P2	LOC498555;Rplp2;LOC100362751	8	81.7	11.706	6.35e-266
D4A4X4;F1M434		Cgn	24	25.3	136.4	0
D4A5I9;D3ZYX5;F1LWP6		Myo6	22	20	145.66	2.02e-154
D4A6S1;E9PSJ6;F1M668;F1M005		Grhpr	13	31.5	36.219	5.17e-68
D4A720;D3Z964;F1LZA3;F1M8R2		rCG_61762	6	25.6	27.377	9.75e-38
D4A746		Gmppb	5	19.7	39.902	4.21e-26
D4A8A0		Cad	13	8.8	243.47	6.72e-173
D4A8E3;Q3MID3	ADP-ribosylation factor GTPase-activating protein 2	Arfgap2	7	15.9	58.067	1.21e-25
D4A8Z9		Selo	4	8.7	74.06	1.76e-71
D4A996;F1LRB4;D4ADD2;F1LXD4;D3ZM20		Kif13b	19	14.8	203.26	2.04e-205
D4A9A6;D4A2Q2;D3ZEZ7;D3ZIP3;D3ZKF7;D4A6Q4;D3ZHS9;D3ZL97;D3ZL93;D3ZMI4;Q9WTP0-2;Q9JMB3;D3ZU77;G3V874;D3ZB32;D3ZDI1;Q9WTP0;D4ACZ3;A3E0T0;D4A9L5;D4ACZ4;D3ZLZ8;D3ZC10		Epb4.1	26	33.2	91.979	2.23e-107
D4A9L2		Srsf1	10	37.1	27.744	1.88e-45
D4AA63		Ubqln2	4	8.2	67.259	0
D4AAG1;P36972	Adenine phosphoribosyltransferase	Aprt	2	12.6	19.764	7.3e-06
D4AAV1		Amdhd1	12	31.3	46.57	5.99e-48
D4AB03		Fam120a	13	17.7	121.74	1.51e-236
D4AC23		Cct7	15	27.2	59.658	1.64e-83
D4ACB7;D3ZN76		LOC100360302	18	14.8	255.56	5.84e-233
D4ACB8		Cct8	13	28.1	59.588	1.63e-88
D4ACJ1;P62850;D4A6H5;P62850-3;P62850-2;D3ZFZ8	40S ribosomal protein S24	LOC100363469;Rps24	6	36.1	15.395	2.39e-41
D4ACL3;G3V6S2;Q63270;Q62751	Cytoplasmic aconitate hydratase	Aco1	40	53.3	98.956	0
D4AD25;F1M779;P11442	Clathrin heavy chain 1	Cltc	54	35.9	192.02	0
D4ADE8;D3ZN21;Q64060;F1LQD1;D4ADV9		Ddx3x;RGD1309586	27	41.1	73.145	8.74e-195
D4ADJ6;REV__D3ZP58;REV__D3ZJB5;REV__D4A6F9;REV__D3ZMQ0		Amfr	11	23.5	72.271	4.98e-34
D4ADW8;G3V960;P10868	Guanidinoacetate N-methyltransferase	Gamt	5	25.6	28.188	2.96e-38
D4AE02;D4A063		RGD1560464	3	7.9	45.041	8.46e-31
D4AEC0;P0C0S7;D4A7X2	Histone H2A;Histone H2A.Z	H2afv;H2afz	2	24.2	13.509	3.08e-18
D4AEH3		Psmd7	8	37.8	36.491	1.4e-249
D4AEH9		Agl	29	20.8	174.33	2.49e-174
D4AEP0	Adenylosuccinate synthetase	Adss	4	12.3	50.085	3.08e-25
E2RUH2;P29315	Ribonuclease inhibitor	LOC100360501;Rnh1	5	12.5	49.919	1.32e-18
E9PSQ0;D3ZBE2;D3ZBE4		Acacb	3	2	274.67	9.81e-112
E9PSR5;D4A9N5		Trim25	10	19.8	71.089	1.55e-70
E9PT65;D4A5L5			11	19.8	68.39	2.5e-112
E9PT85;Q6AZ64		Xrcc6	3	7.1	69.588	3.27e-11
E9PTL2;P12711;G3V7J9;P41682	Alcohol dehydrogenase class-3	Adh5	21	24.2	94.619	1.25e-248
E9PTL9		Ddx19b	2	9.1	54.216	2.35e-91
E9PTU4;E9PTI3;F1M7T3;D4A0G3;Q63862-3;Q63862;Q63862-2	Myosin-11	Myh11	88	38.4	223.8	0
E9PU16;F1M225;Q6NYB7;D3ZQP3;D3ZQP7;D3Z848;P35280;P70550;D4A8V5;P35289;P35286;P35281;D3ZGA3	Ras-related protein Rab-1A	Rab1;Rab1A	2	7	33.696	2.1e-13
F1LM19;P24090;Q7TP75	Alpha-2-HS-glycoprotein	Ahsg	3	14.8	38.167	6.72e-85
F1LM22;P08542;P19488;F1M7N8;F1M3E3	UDP-glucuronosyltransferase 2B17;UDP-glucuronosyltransferase 2B37	Ugt2b17;Ugt2b37;LOC100361864	4	8.5	60.477	1.69e-35
F1LM41;Q62667	Major vault protein	Mvp	24	33.2	96.692	8.03e-122
F1LM47;F1M6A4		Sucla2	5	9.9	50.306	3.23e-16
F1LMG2;Q68FT5	Betaine--homocysteine S-methyltransferase 2	Bhmt2	8	27	39.799	1.06e-76
F1LMI4;P36506;D4A1X1	Dual specificity mitogen-activated protein kinase kinase 2	Map2k2	6	21.2	44.38	9.77e-244
F1LMJ9;Q6TXE9		Eprs	64	43.9	169.86	0
F1LMN4;P12938	Cytochrome P450 2D3	Cyp2d3	4	12.1	57.028	6.75e-147
F1LMP2;P12346;P12346-2;Q4FZX7;F1MAG6	Serotransferrin	Tf	9	9.8	107.41	1.5e-25
F1LMV6		Dsp	52	18.7	332.39	9.51e-253
F1LMW6		Psmd14	5	24.8	32.924	6.46e-81
F1LMZ8;D3Z950		Psmd11	17	38.4	54.019	1.88e-145
F1LNF0;F1LMN2		Myh14	88	47.4	228.91	0
F1LNF1;F1LM82;A7VJC2;A7VJC2-2;A7VJC2-4;A7VJC2-3;D4A1X0	Heterogeneous nuclear ribonucleoproteins A2/B1	Hnrnpa2b1	4	13.6	37.297	3.38e-15
F1LNW3;P97562	Acyl-coenzyme A oxidase;Peroxisomal acyl-coenzyme A oxidase 2	Acox2	32	53.5	76.746	0
F1LNY0;P27605	Hypoxanthine-guanine phosphoribosyltransferase	Hprt1	2	11.9	24.578	6.03e-06
F1LP08;Q5PQJ6	Pyrroline-5-carboxylate reductase 3	Pycrl	6	24.1	28.864	3.47e-44
F1LP72;Q68FR9-2;Q68FR9;G3V9D9;G3V732;F8WG86	Elongation factor 1-delta	Eef1d	9	16.9	72.269	6.68e-109
F1LP75;F1M7H9		Luc7l2	14	27.1	40.774	1.75e-232
F1LPA0		RGD1562301	5	25.7	38.822	4.2e-36
F1LPB3;D3ZW20;O88813	Long-chain-fatty-acid--CoA ligase 5	Acsl5	13	21.6	76.871	4.99e-138
F1LPF6;P11507;E9PSY3;D3ZJN5;E9PSX6;P11507-2;Q64578;P18596;D3ZBM5;D3ZHJ6;G3V9U7;P18596-2	Sarcoplasmic/endoplasmic reticulum calcium ATPase 2	Atp2a2	13	14.3	114.81	1.77e-168
F1LPK7;Q63598;D3ZRK9	Plastin-3	Pls3	11	22.5	70.998	4.43e-133
F1LPV0;F1LML0		Nars	7	20.6	64.198	2.45e-45
F1LQ02;F1LMQ5;G3V9Y1;Q9JLT0	Myosin-10	Myh10	56	34.8	233.61	0
F1LQ09;D4A042		Atl2	4	8.7	66.194	7.95e-28
F1LQ84;F1LQ23		Ugp2	12	26.6	56.838	6.22e-74
F1LQC0		Lars	10	11.6	134.41	2.79e-93
F1LQF5;Q3KR85		Ubac2	5	17.7	38.936	1.34e-11
F1LQK1;P05183;P04800;Q06884	Cytochrome P450 3A2;Cytochrome P450 3A1	Cyp3a2;Cyp3a1;Cyp3a73	5	11.3	57.795	4.3e-25
F1LQL3;P62718;F1M0K6	60S ribosomal protein L18a	Rpl18a;RGD1565566	11	39.8	22.319	4.45e-74
F1LQS3;P21533;D3ZTF3;F1M2R6;F1LVJ5;F1M2L7;F1M4J7	60S ribosomal protein L6	Rpl6	15	41.9	33.545	2.38e-218
F1LR41;G8JLS6;O08590	Amine oxidase;Membrane primary amine oxidase	G6pc;Aoc3	2	1.7	173	2.59e-08
F1LR47;P05178;D4A253;D4A820	Cytochrome P450 2C6	Cyp2c6v2;Cyp2c6	9	18.4	55.994	6.17e-52
F1LR89;O88656	Actin-related protein 2/3 complex subunit 1B	Arpc1b	8	21.5	41.477	2.35e-26
F1LRA1;Q62902	Protein ERGIC-53	Lman1	4	6.8	57.819	1.87e-08
F1LRA3;Q4V7C7;F1LRK8;F1LY09;D3ZHM0	Actin-related protein 3	Actr3	16	40.9	47.285	4.59e-113
F1LRD5;P41562	Isocitrate dehydrogenase [NADP];Isocitrate dehydrogenase [NADP] cytoplasmic	Idh1	28	61	47.462	3.61e-258
F1LRH5;A0FKI7-3;A0FKI7;A0FKI7-2	Acyl-CoA-binding domain-containing protein 5	Acbd5	4	9	57.554	9.18e-16
F1LRI5		Gcn1l1	22	11.9	293.17	3.09e-179
F1LRJ2		Srrm2	3	2	295.88	3.1e-12
F1LRL8		Arpc3	4	24.3	20.435	3.27e-13
F1LRR8;Q4V8K1;Q7TP88	Metalloreductase STEAP4	Steap4	5	15.5	52.674	1.17e-32
F1LRT9		Dync1h1	3	1	416.86	0
F1LS48;Q5XI22;D3ZKB6;F1LWW4	Acetyl-CoA acetyltransferase, cytosolic	Acat3;Acat2	9	20.8	69.82	4.58e-146
F1LS86		Iars	15	16.9	144.44	4.15e-180
F1LSB9;Q5XI07;F1LXI2;D4ADL3;D3ZBA0	Lipoma-preferred partner homolog	Lpp	7	15	68.389	4.18e-38
F1LSI8;P47819;G8JLQ5;P47819-2	Glial fibrillary acidic protein	Gfap	5	14.4	50.07	2.32e-44
F1LSQ6;P48004;P48004-2;D3ZPN4;F1M6I7	Proteasome subunit alpha type;Proteasome subunit alpha type-7	Psma7;LOC100363246	4	24.4	28.398	1.21e-12
F1LSR9;P06757	Alcohol dehydrogenase 1	Adh1	23	53.2	39.994	0
F1LT36;P63326;D3ZH53;D3ZJY5;D3ZEN7;F8WFG4;D4A3Z5;D3ZCN9;D4A3Z6;Q7TP86	40S ribosomal protein S10	Rps10;RGD1561871;LOC100360905;LOC100363439	4	19	19.634	4.67e-20
F1LT49		Lrrc47	4	9.6	63.629	1.87e-30
F1LUV9;P13596;F1LNY3;F1LTE5;F1MA96	Neural cell adhesion molecule 1	Ncam1	3	2.3	118.58	7.24e-07
F1LW74;D3ZCS4		LOC100360623	32	32.1	103.57	0
F1LX65;F1LXC8;F1LXC9			5	9.1	93.739	8.12e-192
F1LXC6			3	8.2	45.272	8.84e-92
F1LYK7		Cfl2	5	39.4	18.578	7.13e-170
F1LYQ5			10	23.8	61.437	7.41e-139
F1LZ34		Mat1a	3	10.8	23.534	0
F1LZW6;F1LX07		Slc25a13	19	33.3	74.382	1.66e-73
F1M1H0			4	18.2	34.054	1.57e-29
F1M1W1;O70490		Bucs1	8	44.6	29.745	3.05e-99
F1M3D3;F1LV13;Q62826;Q62826-2;F1LSJ5;Q9WV78	Heterogeneous nuclear ribonucleoprotein M	Hnrnpm	12	19.2	77.629	2.28e-37
F1M4S5;P83883;F1LWX1;F1M8T2;F8WFR5;D3ZDE0;D4A655	60S ribosomal protein L36a	RGD1563431;Rpl36a	8	30.2	12.278	2.56e-62
F1M510;P45592;F1M3P7	Cofilin-1	Cfl1	3	14.2	24.457	9e-188
F1M5L7			8	47.1	19.882	1.39e-104
F1M5X1;F1M853		Rrbp1	31	28.3	143.41	0
F1M5Z4;P25235;G8JLR0;D4A8V6	Dolichyl-diphosphooligosaccharide--protein glycosyltransferase subunit 2	Rpn2	7	17.7	71.783	2.48e-197
F1M784;F1LXQ8		LOC100361758	13	23.8	74.673	1.25e-124
F1M953;P48721	Stress-70 protein, mitochondrial	Hspa9	16	28.9	73.744	4.17e-95
F1M971;D4A8C7;Q9JJP9	Ubiquilin-1	Ubqln1	2	5.7	62.026	0
F1M9V7;D3Z8Z0		Npepps	9	13.8	103.34	2.57e-113
F1MA29;P63159;D4A9T3;D3ZCR3;D3ZXR5;D3ZA18;D3ZGW6;D4A2L7;D3ZLA7;D3ZL49;D3ZIU9;D3Z8A3;D3ZC69;F1LXZ8;F1M1H9;F1LNG6;D3ZYR6;D3ZLG3;D3ZJN6;D4A0N6;D3Z7Z9;F1M9J4;D3ZZD8;D4AEI9;F1LVZ2;D4A4X8;D3ZWY0;D3ZFH8;F1LTK2;D3ZXP6;F1LTL3;D3ZRY5;D4A5S3;F1M7I0;F1M8Z1;D3ZMK0;F1LYW8;F1M2Z0;F1M607;P52925;D3ZS25;D3ZHA8;D3ZDA5;F1LZ92;D4A160;D3ZEC1;F1M1H1;D4A6A9;F1M875;F1M4R2	High mobility group protein B1	LOC681718;Hmgb1;LOC679451;Hmgb1-ps3;Hmg1l1	11	40	24.908	9.56e-106
F1MA36;Q9QWN8	Spectrin beta chain, brain 2	Sptbn2	60	33.8	270.94	0
F1MA38;P35565	Calnexin	Canx	5	10.5	67.414	5.2e-12
F1MA64;D4A5G0;D3ZR20		Rbm39	14	24.5	59.406	2.14e-107
F1MAC0;E9PU10		Ifi47	8	26.2	47.432	5.15e-66
F1MAE2		Akr1c13	5	30.5	37.257	0
F1MAK5		Ddi2	15	39.1	44.65	1.5e-95
F1MAL3;F1LSL8		Sptb	104	52.2	267.95	0
F1MAM3;D3ZBT0;D3ZN26;D4A4E2			2	7.4	56.871	0.00033887
F1MAR0		Parp9	18	32.5	92.214	2.05e-298
F2Z3Q8;P52296	Importin subunit beta-1	Kpnb1	10	14.2	97.183	1.26e-85
F2Z3R6;F1LMY2;F1LN75;Q9QZR6	Septin-9	2005-08-31	3	7.8	64.866	1.09e-05
F2Z3T9		LOC690372	3	4.2	53.516	2.77e-09
F8WFI9;Q4G061	Eukaryotic translation initiation factor 3 subunit B	Eif3b	8	12.3	107.98	7.06e-143
F8WFR8;P51583	Multifunctional protein ADE2;Phosphoribosylaminoimidazole-succinocarboxamide synthase;Phosphoribosylaminoimidazole carboxylase	LOC100359876;Paics	4	12.9	47.122	8.09e-27
F8WFT7;P23562;Q5U329;P23562-2	Band 3 anion transport protein	Slc4a1	6	8.6	103.24	1.13e-38
F8WFW0;F1LWC2;P23358;D3ZJE2;F1M4N3;D4A8N3;F1LY34	60S ribosomal protein L12	Rpl12;Rpl12-ps1;LOC499782;RGD1563956	6	38.2	20.91	2.71e-116
F8WFW6;P62250	40S ribosomal protein S16	Rps16	15	55.2	19.156	3.4e-95
F8WG47;O35987;D4A5F9	NSFL1 cofactor p47	Nsfl1c	2	8.3	40.923	1.84e-05
F8WG74;Q9QVC8	Peptidyl-prolyl cis-trans isomerase FKBP4;Peptidyl-prolyl cis-trans isomerase FKBP4, N-terminally processed	Fkbp4	4	9.2	51.506	3.42e-10
G3V624		Coro1c	4	10.1	53.177	4.62e-37
G3V6B0;F1M024;F1M5Z2;F1LTX6		Pdxdc1	11	18.7	86.97	1.39e-124
G3V6C2		Hgd	12	42.2	49.889	4.3e-152
G3V6C4;O70199	UDP-glucose 6-dehydrogenase	Ugdh	24	54.2	54.886	0
G3V6D3;P10719	ATP synthase subunit beta;ATP synthase subunit beta, mitochondrial	Atp5b	22	58	56.344	0
G3V6I4		rCG_20363	4	15.6	37.79	1.82e-81
G3V6I9;D4A1Z2;P12749;D4AE42;D3ZSF2;D3ZDV4	60S ribosomal protein L26	Rpl26;Rpl26-ps2;Rpl26-ps1	16	57.9	17.258	3.25e-108
G3V6J0;Q9JLJ3	4-trimethylaminobutyraldehyde dehydrogenase	Aldh9a1	25	43.4	56.468	0
G3V6P7;D4A1H1;D4A8U6		Myh9	22	7.8	226.41	0
G3V6P9;E9PSP2		Sptbn1	3	1.9	251.02	0
G3V6S0;F1LRX5		Sptbn1	3	2.1	274.06	0
G3V6S5;P27653;F1LW12;D3ZZM8	C-1-tetrahydrofolate synthase, cytoplasmic;Methylenetetrahydrofolate dehydrogenase;Methenyltetrahydrofolate cyclohydrolase;Formyltetrahydrofolate synthetase	Mthfd1	55	59.5	100.96	0
G3V6S8		LOC362264	6	17.1	39.025	1.55e-29
G3V6T1;D3ZFS9		Copa	37	34.5	138.36	0
G3V6T7;P38659	Protein disulfide-isomerase A4	Pdia4	8	15.6	72.747	4.26e-32
G3V6W6		LOC100365869	22	64.5	45.796	6.41e-225
G3V6X4;F1LQ82;Q62940;D4A0U5	E3 ubiquitin-protein ligase NEDD4	Nedd4	11	16.9	102.75	1.29e-109
G3V709;Q6XQN1	Nicotinate phosphoribosyltransferase	Naprt1	8	17.5	58.603	2.9e-49
G3V713;Q4KM49	Tyrosine--tRNA ligase, cytoplasmic	Yars	8	20	63.025	2.61e-98
G3V743;O88941	Mannosyl-oligosaccharide glucosidase	Mogs	6	8.9	91.961	3.93e-48
G3V798;F1LSN0		Srsf4	4	12.1	55.674	9.63e-21
G3V7A8;D4A8U7;P28023	Dynactin subunit 1	Dctn1	13	13.3	141.94	3.74e-119
G3V7C6;Q6P9T8	Tubulin beta-4B chain	Tubb4b	7	17.3	49.83	0
G3V7G8;Q5I0G4	Glycine--tRNA ligase	Gars	6	11.5	81.792	2.93e-71
G3V7G9		Eif3s6ip	15	33.2	66.71	1.99e-169
G3V7J0;Q02253	Methylmalonate-semialdehyde dehydrogenase [acylating], mitochondrial	Aldh6a1	23	47.5	57.747	2.08e-302
G3V7L6;Q63347	26S protease regulatory subunit 7	Psmc2	22	59.1	48.633	2.4e-205
G3V7N8;P97840;P97840-2;Q6P7Q6;D3Z839	Galectin-9	Lgals9	4	11.6	39.969	1.58e-73
G3V7Q7;D3ZWX0		Iqgap1	50	34.2	188.83	0
G3V7T5;Q3MIF4	Xylulose kinase	Xylb	12	26.5	59.579	4.77e-158
G3V7V6;Q8VHE9	All-trans-retinol 13,14-reductase	Retsat	3	4.9	67.477	5.82e-07
G3V7W2;P04937;P04937-3;D4AEE1;P04937-2;F1LST1;P04937-4	Fibronectin;Anastellin	Fn1	19	10.7	272.44	1.1e-163
G3V817		Xrcc5	4	6.7	83.091	1.45e-14
G3V822;P16303	Carboxylesterase 3	Ces1d;Ces3	2	4.1	62.149	5.2e-06
G3V826;P50137	Transketolase	Tkt	20	35.1	71.158	5.75e-92
G3V836;P05371;F1LSV6;E9PTR1	Clusterin;Clusterin;Clusterin beta chain;Clusterin alpha chain	Clu	5	15.9	51.42	4.59e-41
G3V852;D4A0S8;F1M4K5		Tln1	78	37.2	269.67	0
G3V888;F1LQS4;P16638;G3V9G4;P16638-2	ATP-citrate synthase	Acly	49	49	120.78	0
G3V8A5		Vps35	13	20.4	91.726	2.92e-293
G3V8C4;Q9Z0W7	Chloride intracellular channel protein 4	Clic4	3	18.2	28.669	1.78e-19
G3V8D5;P85971	6-phosphogluconolactonase	Pgls	9	38.5	30.821	7.69e-60
G3V8G2;D4A8S4		Psmd5	10	24.6	55.852	8.04e-81
G3V8I6;F1LR10;Q4KM31		Lima1	24	39.5	83.796	5.35e-202
G3V8L3;P48679;E9PSR1;D4A4U0;G3V8M3	Prelamin-A/C;Lamin-A/C	Lmna	10	17.7	74.311	1.16e-41
G3V8Q8		Sec23ip	6	8.9	110.94	3.82e-66
G3V900;F1LP06;P05065	Fructose-bisphosphate aldolase;Fructose-bisphosphate aldolase A	Aldoa;Aldoal1	4	10.8	45.086	1.95e-14
G3V918		Gart	8	12.2	107.58	5.4e-56
G3V928		Lrp1	27	7.9	504.88	1.36e-141
G3V940;O89046	Coronin-1B	Coro1b	6	14.9	53.938	1.16e-105
G3V9A2;B2GV99;D3ZCQ5;Q64119;D4A2L0	Myosin light polypeptide 6	Myl6b;Myl6	12	87.4	16.961	0
G3V9B9;P21775;F1LPD6;P07871;D4AB84;P21775-2;D4AE53;D3ZHR3	3-ketoacyl-CoA thiolase A, peroxisomal;3-ketoacyl-CoA thiolase B, peroxisomal	Acaa1a;Acaa1b	18	43.1	44.825	0
G3V9E3;Q62736;F1LQD6;REV__D3ZXH0;REV__D3ZRB1;REV__D3ZZ81;REV__F1M8A4	Non-muscle caldesmon	Cald1	18	30.7	60.611	3.78e-103
G3V9G2;Q9JJ54;G3V6A4;Q9JJ54-3;G3V6A5;Q9JJ54-2;Q9JJ54-4;P17132	Heterogeneous nuclear ribonucleoprotein D0;Heterogeneous nuclear ribonucleoprotein C	Hnrpd;Hnrnpd;Hnrnpc	5	14.4	38.218	1.27e-19
G3V9J1;P14046;F1M4L8;P06238	Alpha-1-inhibitor 3	LOC297568;A1i3;Cpamd8	3	2.7	163.72	1.86e-29
G3V9L3		Dusp3	3	20.9	23.115	5.47e-47
G3V9R0;F1LNK3;F1LNB8;D3ZFH3		Luc7l	12	41.5	38.481	1e-135
G3V9R4;O35826	Bifunctional UDP-N-acetylglucosamine 2-epimerase/N-acetylmannosamine kinase;UDP-N-acetylglucosamine 2-epimerase;N-acetylmannosamine kinase	Gne	24	35.5	82.911	0
G3V9U2;F1LWF9;P13437	3-ketoacyl-CoA thiolase, mitochondrial	Acaa2	29	73.8	41.885	0
G3V9V3;Q62871;Q62871-2;Q6AZ35;D3ZU74;Q62871-3;G3V792;Q63100;Q63100-3;D4A9K8;Q63100-4	Cytoplasmic dynein 1 intermediate chain 2	Dync1i2	5	12.1	71.338	4.06e-68
G3V9Y7;Q5BK32	FAS-associated factor 2	Faf2	9	28.1	52.46	8.91e-39
G3V9Z4;Q5I0J9	Putative L-aspartate dehydrogenase	Aspdh	11	50.9	30.388	2.51e-121
O08557;F1LNX0	N(G),N(G)-dimethylarginine dimethylaminohydrolase 1	Ddah1	5	27	31.426	4.38e-19
O08629;F1M1W6	Transcription intermediary factor 1-beta	Trim28	11	17	88.955	1.3e-158
O09171	Betaine--homocysteine S-methyltransferase 1	Bhmt	25	64.4	44.976	0
O35077;F1M3R0	Glycerol-3-phosphate dehydrogenase [NAD(+)], cytoplasmic	Gpd1	17	46.7	37.452	0
O35142	Coatomer subunit beta	Copb2	24	34.5	102.55	0
O35244;F8WG72	Peroxiredoxin-6	Prdx6	10	61.2	24.818	4.05e-137
O35509;P62494;F1M0S1	Ras-related protein Rab-11B;Ras-related protein Rab-11A	Rab11b;Rab11a	6	28	24.488	7.17e-18
O35547	Long-chain-fatty-acid--CoA ligase 4	Acsl4	2	4.6	74.326	5.61e-13
O35824;Q5M9H7	DnaJ homolog subfamily A member 2	Dnaja2	5	11.7	45.765	5.05e-19
O35952;F1LQI1;O35952-2	Hydroxyacylglutathione hydrolase, mitochondrial	Hagh	3	17.2	34.109	1.53e-32
O55096;F1M7X8	Dipeptidyl peptidase 3	Dpp3;Dpp3l	7	13.1	83.038	3.54e-128
O70351;F1LNT4	3-hydroxyacyl-CoA dehydrogenase type-2	Hsd17b10	11	48.3	27.245	3.21e-153
O88202	60 kDa lysophospholipase;L-asparaginase;Platelet-activating factor acetylhydrolase	Aspg	9	25.9	60.794	1.28e-115
O88321;D4A9C9		Psmd4	9	30.5	41.073	3.57e-119
O88618	Formimidoyltransferase-cyclodeaminase;Glutamate formimidoyltransferase;Formimidoyltetrahydrofolate cyclodeaminase	Ftcd	20	39.9	58.913	5.89e-231
O88767;Q5BKC3	Protein DJ-1	Park7	7	37.6	19.974	8.06e-19
O88989	Malate dehydrogenase, cytoplasmic	Mdh1	9	32.6	36.483	3.13e-53
O89035		Slc25a10	5	17.8	31.454	4.65e-10
P00173;D4A1G4;P00173-2	Cytochrome b5	Cyb5a	10	56.7	15.355	3.07e-135
P00481;F1MAE6	Ornithine carbamoyltransferase, mitochondrial	Otc	9	27.1	39.886	1.63e-19
P00502;Q6TUG1;D3ZD94	Glutathione S-transferase alpha-1	Gsta1	2	7.7	25.607	6.12e-68
P00507;F1LXI9	Aspartate aminotransferase, mitochondrial	Got2	6	19.8	47.314	3.83e-18
P00786	Pro-cathepsin H;Cathepsin H mini chain;Cathepsin H;Cathepsin H heavy chain;Cathepsin H light chain	Ctsh	4	11.7	37.104	1.47e-15
P00884;Q66HT1	Fructose-bisphosphate aldolase B;Fructose-bisphosphate aldolase	Aldob	25	54.9	39.618	2.23e-260
P01026	Complement C3;Complement C3 beta chain;Complement C3 alpha chain;Neutrophil chemotactic factor-2;C3a anaphylatoxin;Complement C3b alpha chain;Complement C3c alpha chain fragment 1;Complement C3dg fragment;Complement C3g fragment;Complement C3d fragment;Complement C3f fragment;Complement C3c alpha chain fragment 2	C3	23	17.7	186.46	2.66e-255
P01946;G3V8R3	Hemoglobin subunit alpha-1/2	Hba1	9	66.9	15.328	3.42e-277
P02091;CON__Q3SX09;O88752;CON__P02070	Hemoglobin subunit beta-1	Hbb	6	33.3	15.979	0
P02262;P0CC09;D4ACV3	Histone H2A type 1;Histone H2A type 2-A;Histone H2A	Hist2h2aa3;Hist2h2ac	2	13.8	14.077	1.57e-108
P02600;P02600-2;P17209	Myosin light chain 1/3, skeletal muscle isoform	Myl1	2	11.6	20.679	2.32e-150
P02650	Apolipoprotein E	Apoe	8	30.4	35.753	8.47e-30
P02680;P02680-2	Fibrinogen gamma chain	Fgg	6	19.8	50.632	2.29e-98
P02692	Fatty acid-binding protein, liver	Fabp1	11	66.1	14.272	6.57e-155
P02706;D3ZMH8	Asialoglycoprotein receptor 1	Asgr1	11	35.6	32.849	6.48e-56
P02770	Serum albumin	Alb	18	31.1	68.73	5.12e-72
P04041	Glutathione peroxidase 1	Gpx1	15	62.7	22.323	1.06e-181
P04642;F1M7I5;F1M2L5;D4AD97;P19629;Q6AYX2;D3ZM24;F1M1K4	L-lactate dehydrogenase A chain;L-lactate dehydrogenase	Ldha	22	63	36.45	0
P04762;D3ZYF1;Q499V8	Catalase	Cat	33	64.9	59.756	0
P04764;D3ZJT8;F1M8W1;F1M6P0;D3ZKP2;P15429;F1LTP6;D3ZYU0;F1M2K7;F1M383;P07323;D4A0Q2;F1M9V3;G8JLQ8;F1M5J0	Alpha-enolase	Eno1	18	50.7	47.127	2.49e-162
P04785	Protein disulfide-isomerase	P4hb	28	51.5	56.951	2.64e-129
P04797;D3ZGY4;E9PTN6;F8WFP3;F1M2U5;D3ZKR3;F1M0Y3;F1M9J7;F1LW99;F1LTU2;F1LUR7;D3ZWV2;F1M359;D3ZDS1;F1LZV7;F1LU03;D3ZQC7;D3ZWP0;F1LY57;D4A3W5;D3ZIY0;F1LUI2;F1LUV3;D4A7F9;F1LZ22;D3Z8U8;F1M9J9;F1M9K7;B1WBQ8;Q9ESV6;D3ZQT0;D4A6J7;D3ZEN2;F1M5I8;F1M4G6;F1M2N4;F1M261;F1M0P5;F1LW42;F1LTV2;F1LW78;D3ZPI7;D4AB12;D3ZXS2;D3ZME3;D3ZW22;D3Z8G2;F1M269;F1MA05;F1LT88;F1M045;E9PTV9;F1M5K4;D3Z7Z7;F1LVS0;D3ZHE9;F1M3A3;…	Glyceraldehyde-3-phosphate dehydrogenase	Gapdh;RGD1560797;RGD1564688	13	43.5	35.828	0
P04897;Q5EEY3;Q63803;D3ZPZ2;P63095;G3V8E8;P38406;D4AA42;P08753;P10824;P29348;P59215;P59215-2;P63095-3	Guanine nucleotide-binding protein G(i) subunit alpha-2	Gnai2	2	9.6	40.499	2.52e-19
P04904;P46418;Q6AXY0	Glutathione S-transferase alpha-3	Gsta3	10	39.8	25.319	6.3e-74
P05179;D3Z7Y1	Cytochrome P450 2C7	Cyp2c7;LOC100361347	21	38.2	56.186	0
P05182;F1LPJ4;D3ZJL9	Cytochrome P450 2E1	Cyp2e1	9	19.5	56.626	2.81e-30
P05197;F1LM66	Elongation factor 2	Eef2	55	53.1	95.283	0
P05369;F1LND7;D3ZJW2	Farnesyl pyrophosphate synthase	Fdps	11	29.2	40.829	1.1e-120
P06685;F1M9H2;D3ZE88;D3ZSA3;P06686;P06687;F1LRK1;G3V8S4;P54708;F1LMF3;Q64541;P54708-2;F1LUN7	Sodium/potassium-transporting ATPase subunit alpha-1	Atp1a1	5	6.1	113.05	2.45e-18
P06761	78 kDa glucose-regulated protein	Hspa5	42	60.4	72.346	0
P06866-2;P06866	Haptoglobin;Haptoglobin alpha chain;Haptoglobin beta chain	Hp	4	12.1	42.474	1.44e-08
P07153	Dolichyl-diphosphooligosaccharide--protein glycosyltransferase subunit 1	Rpn1	20	42.5	68.303	1.65e-207
P07379;F1LQJ7	Phosphoenolpyruvate carboxykinase, cytosolic [GTP]	Pck1	27	51.8	69.415	3.94e-284
P07687;F1LTS8;F8WG46	Epoxide hydrolase 1	Ephx1	7	19.1	52.581	2.6e-27
P07756;F1M9N2	Carbamoyl-phosphate synthase [ammonia], mitochondrial	Cps1	22	14.9	164.58	0
P07824	Arginase-1	Arg1	18	67.2	34.973	3.35e-155
P07872-2;P07872;F1M609;F1LQC1	Peroxisomal acyl-coenzyme A oxidase 1;Peroxisomal acyl-CoA oxidase 1, A chain;Peroxisomal acyl-CoA oxidase 1, B chain;Peroxisomal acyl-CoA oxidase 1, C chain;Acyl-coenzyme A oxidase	Acox1	24	45.2	74.69	0
P07896	Peroxisomal bifunctional enzyme;Enoyl-CoA hydratase/3,2-trans-enoyl-CoA isomerase;3-hydroxyacyl-CoA dehydrogenase	Ehhadh	49	60.5	78.657	0
P07953;P07953-2;F1LQX5;P25114;F1M7B7	6-phosphofructo-2-kinase/fructose-2,6-bisphosphatase 1;6-phosphofructo-2-kinase;Fructose-2,6-bisphosphatase	Pfkfb1	14	32.9	54.763	6.75e-132
P08010;D4AB97;F1LXL7;D4AB87	Glutathione S-transferase Mu 2	Gstm2	13	48.6	25.702	1.4e-178
P08011	Microsomal glutathione S-transferase 1	Mgst1	6	36.8	17.471	5.57e-32
P08033	Gap junction beta-1 protein	Gjb1	4	13.4	32.003	4.83e-21
P08081;D3ZPJ7;P08081-2	Clathrin light chain A	Clta	8	29	26.98	4.79e-69
P08503;G3V796	Medium-chain specific acyl-CoA dehydrogenase, mitochondrial	Acadm	14	41.1	46.555	1.34e-135
P08541;D3ZLR6;F1LLV5;Q62789;G3V688	UDP-glucuronosyltransferase 2B2	Ugt2b	4	7	60.985	1.28e-30
P08649;F1LNM4	Complement C4;Complement C4 beta chain;Complement C4 alpha chain;C4a anaphylatoxin;Complement C4 gamma chain	C4;C4-2	5	4.7	192.16	7.1e-188
P08683;P11510;E9PTW8;F1LSA2;P04167-2;B2GV28;P00176;P04167	Cytochrome P450 2C11	Cyp2c11	14	31.6	57.18	4.97e-85
P09034	Argininosuccinate synthase	Ass1	48	77.9	46.496	0
P09117;E9PTN8	Fructose-bisphosphate aldolase C	Aldoc	2	8.3	39.283	1.57e-07
P09118;F1LZ17	Uricase	Uox	3	14.5	34.934	7.61e-27
P09139;P09139-2	Serine--pyruvate aminotransferase, mitochondrial	Agxt	13	31.9	45.834	9.37e-74
P09367;F1LMK6;P09367-2	L-serine dehydratase/L-threonine deaminase	Sds	8	26.7	38.432	2.21e-63
P09495	Tropomyosin alpha-4 chain	Tpm4	26	63.7	28.509	0
P09527	Ras-related protein Rab-7a	Rab7a	3	16.9	23.504	1.92e-18
P09606	Glutamine synthetase	Glul	14	35.9	42.267	8.27e-282
P09811;G3V8V3;B2GV03;G3V6Y6;P53534;P09812	Glycogen phosphorylase, liver form	Pygl	61	54.5	97.482	0
P0C2X9;F1LQ99;F8WFI0	Delta-1-pyrroline-5-carboxylate dehydrogenase, mitochondrial	Aldh4a1	12	21.8	61.868	1.02e-58
P10111;F1LU07;F1M4T9	Peptidyl-prolyl cis-trans isomerase A;Peptidyl-prolyl cis-trans isomerase	Ppia	6	36	17.874	5.51e-54
P10634	Cytochrome P450 2D26	Cyp2d26	11	28.4	56.683	3.2e-206
P10760;D4AB27;D3ZQH8	Adenosylhomocysteinase	Ahcy	24	44.4	47.538	1.24e-233
P10860	Glutamate dehydrogenase 1, mitochondrial	Glud1	28	42.3	61.415	0
P10867;F1LR61;F1M5I9;F1LZB1	L-gulonolactone oxidase	Gulo	4	8	50.615	6.97e-10
P11030;F1LV02	Acyl-CoA-binding protein;Triakontatetraneuropeptide;Octadecaneuropeptide	Dbi	2	36.8	10.027	4.79e-07
P11232	Thioredoxin	Txn	4	25.7	11.673	1.59e-13
P11348	Dihydropteridine reductase	Qdpr	9	45.2	25.552	6.59e-56
P11497;P11497-2;F1LP35;D3ZRA3	Acetyl-CoA carboxylase 1;Biotin carboxylase	Acaca	35	21.8	265.19	0
P11517	Hemoglobin subunit beta-2		4	32	15.982	0
P11598	Protein disulfide-isomerase A3	Pdia3	25	51.1	56.623	1.37e-155
P11711	Cytochrome P450 2A1	Cyp2a1	2	4.3	55.994	8.77e-42
P11915;F1LQ55;P11915-2;Q6QI48	Non-specific lipid-transfer protein	Scp2	25	44.8	58.813	8.21e-285
P11951;F1M733;P11950	Cytochrome c oxidase subunit 6C-2	Cox6c2	4	46.1	8.4548	1.95e-13
P12001;D4AD69;D3ZWH7	60S ribosomal protein L18	Rpl18	13	50.5	21.658	4.31e-110
P12007	Isovaleryl-CoA dehydrogenase, mitochondrial	Ivd	6	12.5	46.435	2.45e-24
P12075	Cytochrome c oxidase subunit 5B, mitochondrial	Cox5b	3	20.9	13.915	8.52e-07
P12785	Fatty acid synthase;[Acyl-carrier-protein] S-acetyltransferase;[Acyl-carrier-protein] S-malonyltransferase;3-oxoacyl-[acyl-carrier-protein] synthase;3-oxoacyl-[acyl-carrier-protein] reductase;3-hydroxypalmitoyl-[acyl-carrier-protein] dehydratase;Enoyl-[acyl-carrier-protein] reductase;Oleoyl-[acyl-carrier-protein] hydrolase	Fasn	88	42	272.65	0
P12928-2;P12928;D3ZH85;F1LTA5	Pyruvate kinase isozymes R/L	Pklr	31	68.9	58.793	0
P12939;Q5I0P9	Cytochrome P450 2D10	Cyp2d10;Cyp2d5	2	5.8	57.076	5.12e-227
P13086	Succinyl-CoA ligase [ADP/GDP-forming] subunit alpha, mitochondrial	Suclg1	11	26	36.148	1.7e-106
P13255	Glycine N-methyltransferase	Gnmt	8	33.1	32.549	1.23e-94
P13444	S-adenosylmethionine synthase isoform type-1	Mat1a	11	18.9	43.697	0
P13471;Q6PDV6;D4A290;F1MA00	40S ribosomal protein S14	Rps14	9	41.7	16.259	3.02e-177
P13803;REV__Q9Z2Y1;REV__E9PTS7;REV__E9PU68;REV__F1MAI7	Electron transfer flavoprotein subunit alpha, mitochondrial	Etfa	10	32.7	34.951	1.34e-36
P13832	Myosin regulatory light chain RLC-A	Rlc-a	2	16.3	19.895	0
P14056;F1M9C3	Serine/threonine-protein kinase A-Raf	Araf	6	19.4	67.551	7.7e-38
P14141	Carbonic anhydrase 3	Ca3	15	74.2	29.431	0
P14408;Q5M964;P14408-2	Fumarate hydratase, mitochondrial	Fh	18	52.7	54.463	0
P14480-2;D3Z8Y5;P14480;CON__P02676	Fibrinogen beta chain;Fibrinopeptide B;Fibrinogen beta chain	Fgb	5	10.3	56.612	2.92e-40
P14669;F1LSV5;F1M3H7;F1M0L7;Q6TXF2	Annexin A3;Annexin	Anxa3	4	13.9	36.363	4.32e-08
P14942;F1LVC6;D3ZBD6	Glutathione S-transferase alpha-4;Glutathione S-transferase	Gsta4;LOC100365881	3	13.1	25.51	2.48e-11
P15178	Aspartate--tRNA ligase, cytoplasmic	Dars	19	46.7	57.126	1.69e-141
P15650	Long-chain specific acyl-CoA dehydrogenase, mitochondrial	Acadl	9	23.3	47.872	7.44e-38
P15709;D3ZR55	Bile salt sulfotransferase	St2a1	2	9.2	33.19	1.57e-193
P15865;D4A3K5	Histone H1.2	Hist1h1c	5	20.1	21.987	4.51e-37
P15999;F1LP05	ATP synthase subunit alpha, mitochondrial;ATP synthase subunit alpha	Atp5a1	42	60.4	59.753	0
P16617;Q5XIV1;D4A9Z5	Phosphoglycerate kinase 1	Pgk1	26	61.2	44.538	0
P16970;F1LR38	ATP-binding cassette sub-family D member 3	Abcd3	38	47.5	75.315	0
P17074;D4A6G6;D3ZSH6;F1LYF3;F1M764;F1M8C7;D3ZUD7;D3ZGN8;F1M395;F1M9M2;D4A8B9;F1LYT7;F1LUH5	40S ribosomal protein S19	Rps19;LOC100362339;LOC100360843;RGD1562153;LOC687298	18	75.2	16.085	5.44e-93
P17077;D3ZMB8;F1M7A9;F1LX84;D4ABC9;F1M2X8;D3ZZQ7;F1M309	60S ribosomal protein L9	Rpl9;RGD1561789;RGD1561928	10	48.4	21.893	8.43e-91
P17078;D3ZN79;D3ZB50;F1M6G3;D3Z942;D3ZEF3	60S ribosomal protein L35	Rpl35;LOC686074	7	42.3	14.552	1.63e-116
P17625;D3ZDS5;D4A5K9	Glycogen [starch] synthase, liver	Gys2	6	10.2	80.733	9.72e-86
P17712;P17712-3;P17712-2;Q64596	Glucokinase	Gck	8	21.7	52.116	1.36e-131
P17764	Acetyl-CoA acetyltransferase, mitochondrial	Acat1	9	27.6	44.695	1.46e-88
P17988	Sulfotransferase 1A1	Sult1a1	14	52.6	33.906	4.41e-201
P18163	Long-chain-fatty-acid--CoA ligase 1	Acsl1	26	36.1	78.178	0
P18297;D3ZT59	Sepiapterin reductase	Spr	4	18.7	28.128	1.65e-13
P18418	Calreticulin	Calr	11	26	47.995	5.84e-85
P18420	Proteasome subunit alpha type-1	Psma1	3	16.3	29.517	5.88e-17
P19112;F1LRT1;Q9Z1N1	Fructose-1,6-bisphosphatase 1	Fbp1	26	68.6	39.609	0
P19225	Cytochrome P450 2C70	Cyp2c70	4	10	56.156	7.43e-34
P19468	Glutamate--cysteine ligase catalytic subunit	Gclc	11	30	72.618	1.18e-197
P19804;Q05982;D3ZGV9	Nucleoside diphosphate kinase B;Nucleoside diphosphate kinase A	Nme2;Nme1	5	50.7	17.283	2.69e-35
P19945;D3ZJT4;F1M2B8;D3ZAV9	60S acidic ribosomal protein P0	Rplp0	14	47.3	34.215	7.01e-201
P20070-2;P20070;P20070-3	NADH-cytochrome b5 reductase 3;NADH-cytochrome b5 reductase 3 membrane-bound form;NADH-cytochrome b5 reductase 3 soluble form	Cyb5r3	6	27	34.865	1.62e-38
P20673;Q4QRB8	Argininosuccinate lyase	Asl	24	47.7	51.549	2.05e-284
P20814;D3Z8S1	Cytochrome P450 2C13, male-specific	Cyp2c13;LOC100361492	3	8.2	55.859	4.76e-17
P20816	Cytochrome P450 4A2	Cyp4a2	4	11.3	57.968	1.78e-52
P21531;D3ZXU8;D4A9G1	60S ribosomal protein L3	Rpl3	27	53.8	46.135	4.81e-215
P21643	Tryptophan 2,3-dioxygenase	Tdo2	7	20.4	47.856	2.87e-45
P22734;P22734-2	Catechol O-methyltransferase	Comt	13	34.1	29.597	1.77e-106
P22791;F1M9Q5;P17425	Hydroxymethylglutaryl-CoA synthase, mitochondrial	Hmgcs2	21	38.6	56.911	0
P23457;P51652;G3V895;Q6AYQ2;D3ZEL2;F1LU12;F1M6N4;D3ZRB7	3-alpha-hydroxysteroid dehydrogenase	Akr1c9	24	61.8	37.027	0
P23514	Coatomer subunit beta	Copb1	18	25.8	107.01	0
P24329	Thiosulfate sulfurtransferase	Tst	6	22.6	33.406	1.62e-35
P24470;Q68G40	Cytochrome P450 2C23	Cyp2c23	11	22.9	56.432	6.45e-45
P25093;F1M6W1;D4AEK8	Fumarylacetoacetase	Fah	10	33.9	45.975	8.32e-111
P25113;P16290;F1M1Y1	Phosphoglycerate mutase 1;Phosphoglycerate mutase 2	Pgam1;Pgam2	9	40.6	28.832	7.91e-24
P25409	Alanine aminotransferase 1	Gpt	4	7.5	55.109	6.73e-11
P25886;F1LYI5;D4A3G6;D3ZWV1;D4A883;D3Z8Q4;D3ZKM8;D4A7X3;F1LX53;D3ZIV1;D4AEL5;F1LW15;D3ZDV6;F1LVH1;F1M2K5;F1M3I7;F1M346;D3Z7Z0;F1LWX2;F1M4V2;F1LZU8;F1M4N2;D4A888;D4A1N7	60S ribosomal protein L29	Rpl29;RGD1564138	7	32.7	17.325	5.29e-17
P27364;F1LNS3;P22072;P22071;Q62878	3 beta-hydroxysteroid dehydrogenase type 5;3 beta-hydroxysteroid dehydrogenase/Delta 5-->4-isomerase type 2;3-beta-hydroxy-Delta(5)-steroid dehydrogenase;Steroid Delta-isomerase	Hsd3b5;Hsd3b	3	9.4	42.206	7.7e-63
P27867;Q6TUH3	Sorbitol dehydrogenase	Sord	16	35	38.234	7.65e-108
P27952;G3V957;E9PU05;E9PTY3;D3ZQW7;D3ZIY7;F1LUI9;F1LZV8;D4A577;E9PT76;E9PSQ6;D3ZT78;D3ZQ72;D3ZHD8;F1M5X9;D3ZW37;D3ZAS1;F1LVB4;D3ZP90;F1LUE4;F1M474;E9PTW0	40S ribosomal protein S2	Rps2;LOC100359960;LOC688473;RGD1560789	10	32.8	31.231	3.71e-38
P28037	Cytosolic 10-formyltetrahydrofolate dehydrogenase	Aldh1l1	44	50.9	98.873	0
P28480;F1LUR8	T-complex protein 1 subunit alpha	Tcp1	18	39.7	60.359	1.21e-106
P29147	D-beta-hydroxybutyrate dehydrogenase, mitochondrial	Bdh1	8	22.4	38.201	1.8e-26
P29314;D3ZV50;D3ZF87;F1LY44;D3ZGL8;D3ZTT5	40S ribosomal protein S9	Rps9;RGD1566136;LOC100364509	19	58.8	22.591	2.83e-73
P29410;P29410-2	Adenylate kinase 2, mitochondrial	Ak2	3	15.5	26.379	1.79e-05
P29419	ATP synthase subunit e, mitochondrial	Atp5i	3	42.3	8.2545	1.36e-07
P29457;Q5RJR9	Serpin H1	Serpinh1	6	22.8	46.517	2.8e-38
P30713	Glutathione S-transferase theta-2	Gstt2	10	43	27.439	3.23e-58
P30835	6-phosphofructokinase, liver type	Pfkl	4	6.9	85.338	2.04e-47
P31000;G3V8C3;F1M7P4;P21807;P12839;G3V7S2;G3V8Q2;P23565;P19527	Vimentin	Vim	50	80.5	53.732	0
P31044	Phosphatidylethanolamine-binding protein 1;Hippocampal cholinergic neurostimulating peptide	Pebp1	7	57.8	20.801	8.73e-75
P31210;F1LML3	3-oxo-5-beta-steroid 4-dehydrogenase	Akr1d1	25	81	37.377	0
P31399;D3ZWT8	ATP synthase subunit d, mitochondrial	Atp5h	3	25.5	18.763	1.03e-17
P32089;F1M1U5	Tricarboxylate transport protein, mitochondrial	Slc25a1	9	26	33.835	1.37e-23
P32232;F1LME2;P32232-2;D3ZPH9;P32232-3;D3ZSC5	Cystathionine beta-synthase	Cbs	4	8.7	61.454	1.29e-14
P32551	Cytochrome b-c1 complex subunit 2, mitochondrial	Uqcrc2	5	13.1	48.396	4.06e-13
P32755;F1LNW9	4-hydroxyphenylpyruvate dioxygenase	Hpd	18	53.7	45.112	7.84e-99
P34058;D4A2Z9;D4AE04;F1LT18;F1LYW7;F1M2F7;F1M4X8;D3ZNW2;D3ZZB5;D3ZXC7	Heat shock protein HSP 90-beta	Hsp90ab1	33	40.3	83.28	0
P35213;P35213-2	14-3-3 protein beta/alpha;14-3-3 protein beta/alpha, N-terminally processed	Ywhab	4	22.4	28.054	2.17e-142
P35427;Q5RK10	60S ribosomal protein L13a	Rpl13a	15	56.2	23.476	2.86e-50
P35704;D4AAA7	Peroxiredoxin-2	Prdx2	7	31.3	21.783	5.13e-31
P36201;D4ACX1	Cysteine-rich protein 2	Crip2	8	62	22.696	2.03e-33
P36365	Dimethylaniline monooxygenase [N-oxide-forming] 1	Fmo1	2	4.1	59.825	2.02e-05
P38650;D3ZGC7	Cytoplasmic dynein 1 heavy chain 1	Dync1h1	24	5	532.25	0
P38918	Aflatoxin B1 aldehyde reductase member 3	Akr7a3	8	26.9	36.747	2.5e-30
P38983	40S ribosomal protein SA	Rpsa	8	47.1	32.824	2.19e-98
P40329	Arginine--tRNA ligase, cytoplasmic	Rars	9	18.2	75.81	6.75e-91
P41034	Alpha-tocopherol transfer protein	Ttpa	8	30.9	31.845	2.21e-112
P41123;D4A075;D3ZRM9;D3ZD02;D3Z9H4;F1M2E9;F1LUH3;D3ZFF0	60S ribosomal protein L13	Rpl13;LOC100361259;LOC100360491;RGD1563145	14	44.5	24.309	7.49e-211
P41498;P41498-2	Low molecular weight phosphotyrosine protein phosphatase	Acp1	9	47.5	18.151	1.1e-168
P41542;D4AAH7;D4AAI0;REV__P59215;REV__P59215-2	General vesicular transport factor p115	Uso1	24	31.6	107.16	0
P46462	Transitional endoplasmic reticulum ATPase	Vcp	34	44.3	89.348	7.54e-264
P46953	3-hydroxyanthranilate 3,4-dioxygenase	Haao	11	44.1	32.582	1.55e-54
P47942	Dihydropyrimidinase-related protein 2	Dpysl2	8	21.9	62.277	1.66e-163
P47967;G3V7N2	Galectin-5	Lgals5	2	15.2	16.196	5.19e-39
P48037;Q6IMZ3;D4ABR6	Annexin A6;Annexin	Anxa6	9	15.8	75.753	9.58e-24
P48500	Triosephosphate isomerase	Tpi1	8	43.8	26.849	1.79e-54
P48508	Glutamate--cysteine ligase regulatory subunit	Gclm	5	24.1	30.548	2.73e-71
P48675;Q6P725	Desmin	Des	5	15.8	53.456	7.66e-94
P49242;Q6TXJ6;D3ZV98;D3ZFW0	40S ribosomal protein S3a;40S ribosomal protein S3b	Rps3a	25	67	29.945	1.67e-186
P50116	Protein S100-A9	S100a9	2	24.8	13.145	1.99e-33
P50237	Sulfotransferase 1C1	Sult1c1	16	62.2	35.764	2.83e-130
P50399	Rab GDP dissociation inhibitor beta	Gdi2	3	7.2	50.537	7.92e-07
P50475;F1LS09	Alanine--tRNA ligase, cytoplasmic	Aars	30	36.7	106.79	0
P50503	Hsc70-interacting protein	St13	3	9	41.279	0.00026615
P51635	Alcohol dehydrogenase [NADP(+)]	Akr1a1	9	32.6	36.505	1.35e-51
P52631;D3Z8V9	Signal transducer and activator of transcription 3	Stat3	20	34.9	88.039	0
P52759;F8WFW1	Ribonuclease UK114	Hrsp12	7	57.7	14.303	2.86e-32
P52845;P49889;F1LNK1;Q9WUW9;D3ZK28;F1LZT0	Estrogen sulfotransferase, isoform 2;Estrogen sulfotransferase, isoform 3	Ste2;Ste	3	6.1	35.364	2.38e-49
P52847	Sulfotransferase family cytosolic 1B member 1	Sult1b1	22	61.5	34.835	0
P52873	Pyruvate carboxylase, mitochondrial	Pc	47	48.3	129.78	0
P52944	PDZ and LIM domain protein 1	Pdlim1	4	19.3	35.584	9.54e-20
P54319;D3ZDI0	Phospholipase A-2-activating protein	Plaa	10	15.2	87.083	1.54e-130
P54777;D3ZBJ9;F8WG23	Peroxisome assembly factor 2	Pex6	17	21.3	104.43	4.13e-80
P55006;F1LVY2;D3ZBV0;D3ZJP5	Retinol dehydrogenase 7	Rdh7	3	6	35.736	1.27e-104
P55051	Fatty acid-binding protein, brain	Fabp7	3	31.1	14.864	2.94e-13
P55159	Serum paraoxonase/arylesterase 1	Pon1	4	12.7	39.358	1.85e-31
P56571	ES1 protein homolog, mitochondrial		8	33.1	28.172	8.29e-169
P56574	Isocitrate dehydrogenase [NADP], mitochondrial	Idh2	7	22.3	50.967	5.7e-58
P57093	Phytanoyl-CoA dioxygenase, peroxisomal	Phyh	12	33.7	38.588	3.04e-66
P57113	Maleylacetoacetate isomerase	Gstz1	9	47.2	23.961	1.09e-88
P60123	RuvB-like 1	Ruvbl1	3	9.9	50.213	9.17e-19
P60901	Proteasome subunit alpha type-6	Psma6	2	9.3	27.399	3.81e-06
P61206;P84079;P84082;F1M0J2	ADP-ribosylation factor 3;ADP-ribosylation factor 1;ADP-ribosylation factor 2	Arf3;Arf1;Arf2	4	28.7	20.601	3.49e-111
P61314;D3ZU80;D3ZXA2;D3ZF52	60S ribosomal protein L15;Ribosomal protein L15	Rpl15;RGD1560501	15	56.9	24.146	8.4e-78
P61354;D4AD41;D3ZTK5;D3ZYF9;D3ZZV8;F1M0X8	60S ribosomal protein L27	Rpl27;LOC688784;RGD1563835;RGD1565900	12	66.2	15.798	3.05e-104
P61459	Pterin-4-alpha-carbinolamine dehydratase	Pcbd1	2	23.1	11.999	4.25e-05
P61515;F1LNS9;D4A7B1;D4AAZ6;D3ZGU1;D4A829;F1M3Q2	Putative 60S ribosomal protein L37a;60S ribosomal protein L37a	Rpl37a-ps1;LOC679823;Rpl37a	8	73.9	10.275	6.27e-39
P61983	14-3-3 protein gamma;14-3-3 protein gamma, N-terminally processed	Ywhag	4	17.8	28.302	9.25e-55
P62083;Q6AY74;D4AC24;F1M8D1	40S ribosomal protein S7	Rps7	13	66.5	22.127	1.7e-166
P62193	26S protease regulatory subunit 4	Psmc1	24	56.6	49.184	9.2e-262
P62198	26S protease regulatory subunit 8	Psmc5	29	74.9	45.626	0
P62243;D3ZIE1;Q6TXJ0;D3ZT31;F1M7J4	40S ribosomal protein S8	Rps8;RGD1566369;LOC297756	16	52.4	24.205	2.12e-235
P62246;D3ZLL8;D4A8P1;D3ZZC7;D3ZS61;D3ZFC7;D3ZQT6;F1M5P5	40S ribosomal protein S15a	Rps15a;LOC100361715;LOC687680;LOC100362139	9	46.2	14.839	4.76e-214
P62260	14-3-3 protein epsilon	Ywhae	7	25.1	29.174	1.9e-71
P62268;D4A9Q3	40S ribosomal protein S23	Rps23;RGD1563570	6	30.1	15.807	8.74e-25
P62271;D3ZM33;D3ZII2;D3ZAU6;F1M6D1;D4AA93;F1M2A2	40S ribosomal protein S18	Rps18;LOC100362298;RGD1562404;RGD1561919	23	67.8	17.718	5.36e-144
P62275	40S ribosomal protein S29	Rps29	5	58.9	6.6767	5.82e-39
P62278;F1LMB4	40S ribosomal protein S13	Rps13	11	46.4	17.222	5.98e-69
P62703;D3ZX01;D4AEI1;D3ZFZ5;D3ZJQ1	40S ribosomal protein S4, X isoform	Rps4x	25	72.2	29.597	1.24e-198
P62716;P63331;D3ZHP2	Serine/threonine-protein phosphatase 2A catalytic subunit beta isoform;Serine/threonine-protein phosphatase 2A catalytic subunit alpha isoform;Serine/threonine-protein phosphatase	Ppp2cb;Ppp2ca	2	10.7	35.575	1.39e-70
P62755;D3Z9H5;D3ZBN8;D4A8N8	40S ribosomal protein S6	Rps6	19	45.4	28.68	0
P62804;F1M449	Histone H4;Osteogenic growth peptide	Hist1h4b	5	39.8	11.367	6.59e-15
P62815;D3ZZS8	V-type proton ATPase subunit B, brain isoform	Atp6v1b2	10	24.1	56.55	1.4e-61
P62828;Q66H11;Q8K586	GTP-binding nuclear protein Ran;GTP-binding nuclear protein Ran, testis-specific isoform	Ran;RGD1306195;Rasl2-9	8	35.6	24.423	1.46e-72
P62832;D3ZUS1	60S ribosomal protein L23	Rpl23	13	70.7	14.865	9.75e-186
P62845;D3ZAK6	40S ribosomal protein S15	Rps15;LOC100360484	7	46.9	17.04	2.33e-90
P62853;F1M6F4;D4AE10;D3ZCH5;D3ZWX8	40S ribosomal protein S25	Rps25;RGD1564597;RGD1563613;LOC100359763;LOC685085	9	48	13.742	8.63e-89
P62856;D3Z8D7;F1M3V7;F1M6H7;D3ZJ54;D4AAJ9;F1LYT3;F1M5Y5	40S ribosomal protein S26	Rps26;LOC100361854;RGD1562415;LOC100361756;RGD1565117	5	39.1	13.015	7.15e-23
P62890;D4A1E6;D3ZA94;F1M3Q4	60S ribosomal protein L30	Rpl30	6	56.5	12.784	5.64e-34
P62902;D3ZX87;D4ABZ9;D4ACQ2;D3ZKU5;D3ZZ60;D3ZU04;D3ZK34;D3Z8W1	60S ribosomal protein L31	Rpl31;LOC100361974;LOC690384;RGD1564839;LOC681356;RGD1565894;LOC680384	2	18.4	14.463	2.88e-42
P62907;D4A7Y6;F1LYQ7;D3ZBX4;F1M8D2;D3Z9F6	60S ribosomal protein L10a;Ribosomal protein	Rpl10a;RGD1566137;LOC680700;RGD1559639	11	41.5	24.831	5.06e-67
P62909;D3ZVH2	40S ribosomal protein S3	Rps3;RGD1560831	23	82.7	26.674	5.32e-189
P62912;D4A890;D4A412;D4A8R0;D3ZAC3;D3ZWL0;D3ZRY2;D4ACC7	60S ribosomal protein L32	Rpl32;LOC100363713	7	34.8	15.86	1.21e-50
P62914;F2Z3S4	60S ribosomal protein L11	Rpl11	11	39.9	20.252	1.32e-70
P62919;D4A6W6	60S ribosomal protein L8	Rpl8;RGD1561333	17	44.7	28.024	5.51e-137
P62944-2;P62944	AP-2 complex subunit beta	Ap2b1	10	10.7	105.69	5.88e-57
P62963;CON__P02584	Profilin-1	Pfn1	9	67.1	14.957	3.19e-186
P62982;D3ZCM1;F1LML2;Q63429;P0CG51;G3V9Z2;P62986;F1M5M5;F1M5P0;F1M4U4;F1LU69;D4A0J6;F1LYW3;F1M927;F1M282;F1M0Q4;F1M9H9;F1M516;D4A2F5;F1M148;F1M3P8;F1M2X0	Ubiquitin-40S ribosomal protein S27a;Ubiquitin;40S ribosomal protein S27a;Polyubiquitin-C;Ubiquitin;Ubiquitin-related;Polyubiquitin-B;Ubiquitin;Ubiquitin-60S ribosomal protein L40;Ubiquitin;60S ribosomal protein L40	Rps27a;Ubc;Ubb;LOC100360548;Uba52	11	69.9	17.951	9.95e-96
P62997;D3ZLN0;F1LVK5	Transformer-2 protein homolog beta	Tra2b	9	33.7	33.665	2.36e-34
P63018;D4A4S3;F1LLW5;F1LZI1;P14659;F1M2Y7;D3ZH98;F1LPF5;P55063;Q07439;F1LM52	Heat shock cognate 71 kDa protein	Hspa8	34	51.4	70.87	0
P63029;D3ZFK4	Translationally-controlled tumor protein	Tpt1	2	14	19.462	5.43e-06
P63036	DnaJ homolog subfamily A member 1	Dnaja1	11	34.5	44.868	6.01e-156
P63039;D4ABH6;D3Z9X1;D3ZVX2;F1M6U4	60 kDa heat shock protein, mitochondrial	Hspd1	28	46.6	60.955	1.97e-170
P63102	14-3-3 protein zeta/delta	Ywhaz	6	26.9	27.771	5.45e-158
P63174;D4AD70;D3ZZH2;D3ZW57;D4A862	60S ribosomal protein L38	Rpl38;RGD1561636;LOC680353;LOC100365156	6	57.1	8.2178	6.47e-42
P63245	Guanine nucleotide-binding protein subunit beta-2-like 1	Gnb2l1	14	46.1	35.076	7.21e-134
P67779;D3ZN73;D4A508;D3ZFE2;F1LWX0	Prohibitin	Phb	3	12.5	29.82	4.57e-14
P68035;P68136	Actin, alpha cardiac muscle 1;Actin, alpha skeletal muscle	Actc1;Acta1	2	8.8	42.019	0
P68101	Eukaryotic translation initiation factor 2 subunit 1	Eif2s1	5	27.3	36.108	3.8e-69
P68255;D3ZM53;D3ZCY6	14-3-3 protein theta	Ywhaq	4	15.9	27.778	2.15e-54
P69897	Tubulin beta-5 chain	Tubb5	3	9.7	49.67	0
P70470	Acyl-protein thioesterase 1	Lypla1	4	18.7	24.708	1.13e-11
P70567;Q6IMZ5;D3ZSG3	Tropomodulin-1	Tmod1	7	26.2	40.48	1.33e-41
P80254	D-dopachrome decarboxylase	Ddt	5	50.8	13.133	2.18e-18
P81795;D3ZSB4	Eukaryotic translation initiation factor 2 subunit 3	Eif2s3	5	15.7	51.079	4.45e-83
P82995;F1LTA7;D3ZE66;F1M5B6;D4ABF9;D3ZSM0	Heat shock protein HSP 90-alpha	Hsp90aa1	17	23.5	84.814	0
P83732	60S ribosomal protein L24	Rpl24	10	51.6	17.779	4.49e-47
P83868	Prostaglandin E synthase 3	Ptges3	2	16.9	18.721	3.35e-16
P84092;D3ZSE7;F1LZR8	AP-2 complex subunit mu	Ap2m1	16	34.5	49.654	3.2e-62
P84100;F1M5A9;D3ZYJ9;F1LYA5;F1LZL7	60S ribosomal protein L19	Rpl19	16	46.4	23.466	3.92e-137
P85108;Q3KRE8	Tubulin beta-2A chain;Tubulin beta-2B chain	Tubb2a;Tubb2b	6	22.2	49.906	0
P85834;F8WFG8	Elongation factor Tu, mitochondrial	Tufm	13	31.6	49.522	3.67e-127
P85972	Vinculin	Vcl	7	9.6	116.61	3.77e-36
P85973;D3ZXK9	Purine nucleoside phosphorylase	Pnp	12	52.9	32.302	1.02e-146
P97524;D3ZSL9;D3ZUP3;F1LRI0	Very long-chain acyl-CoA synthetase	Slc27a2	22	41.8	70.693	0
P97532	3-mercaptopyruvate sulfurtransferase	Mpst	4	14.5	32.94	3.59e-21
P97536;F8WGA1;D4AAI5;Q9R0L4-2	Cullin-associated NEDD8-dissociated protein 1	Cand1	27	25.3	136.36	2.23e-255
P97608	5-oxoprolinase	Oplah	26	26.2	137.72	1.39e-216
Q02974;D3ZN65;Q02974-2	Ketohexokinase	Khk	7	18.5	32.749	6.19e-54
Q03248;D3Z8J1	Beta-ureidopropionase	Upb1	12	45.8	44.042	4.4e-219
Q03336	Regucalcin	Rgn	21	62.2	33.389	0
Q04462	Valine--tRNA ligase	Vars	5	6.6	140.37	1.32e-76
Q06647	ATP synthase subunit O, mitochondrial	Atp5o	13	65.3	23.397	1.91e-165
Q07009	Calpain-2 catalytic subunit	Capn2	3	4	79.918	9.52e-15
Q07014;Q07014-2;Q4KM97	Tyrosine-protein kinase Lyn	Lyn	4	10.4	58.659	1.57e-29
Q07071	Glucokinase regulatory protein	Gckr	12	27.6	68.917	5.84e-150
Q07523	Hydroxyacid oxidase 2	Hao2	2	7.9	39.201	1.04e-05
Q09073;D4A481;Q05962;Q6P9Y4;D3ZE29;F1LZS8;D3ZB81;F1LXE6;D4A2A1	ADP/ATP translocase 2;ADP/ATP translocase 1	Slc25a5;Slc25a4	13	38.6	32.901	1.54e-34
Q09167;F8WFV0;Q09167-2	Serine/arginine-rich splicing factor 5	Srsf5	7	27.5	30.891	3.84e-20
Q0VGK3	Glycerate kinase	Glyctk	9	18.5	55.187	3.62e-177
Q0ZFS8;D3ZL34;F1LT59		Srsf3;rCG_61099	13	51.2	19.329	1.12e-136
Q0ZHH6;F1LR13;Q0ZHH6-2;Q6PST4;D3ZJE7	Atlastin-3	Atl3	5	9.2	60.585	9.32e-28
Q10758;CON__H-INV:HIT000292931;CON__Q9H552;CON__P08729;CON__Q3KNV1;CON__Q9DCV7;Q6IG12;G3V712;CON__Q6ISB0;CON__Q9NSB2;CON__H-INV:HIT000016045;CON__REFSEQ:XP_092267	Keratin, type II cytoskeletal 8	Krt8	17	28.4	54.018	0
Q1JU68;F1LRG1	Eukaryotic translation initiation factor 3 subunit A	Eif3a	25	19.1	163.19	3.52e-106
Q2PQA9;F1M8F2;G3V6L4;Q6QLM7;P56536	Kinesin-1 heavy chain	Kif5b	18	24.3	109.53	6.59e-221
Q32PZ3	Protein unc-45 homolog A	Unc45a	14	15.4	103.24	2.21e-43
Q32Q06;D3ZRP6	AP-1 complex subunit mu-1	Ap1m1	13	40	48.556	7.94e-97
Q3B7U9	Peptidyl-prolyl cis-trans isomerase FKBP8	Fkbp8	5	13.9	43.555	6.92e-22
Q3KRE0;F8WFF6	ATPase family AAA domain-containing protein 3	Atad3;Atad3a	4	9.5	66.758	1.58e-14
Q3KRF2;Q9Z1A6;D3ZWX5;Q6P513	Vigilin	Hdlbp	53	48.4	141.69	0
Q3MHS9;D4AD79;D3ZZG6		Cct6a	17	32.2	58.017	9.09e-164
Q3MIB4;D4A1B4;Q6TXI3	Lon protease homolog 2, peroxisomal;Lon protease homolog	Lonp2	5	11.6	94.392	2.42e-48
Q3MID4		Shpk	4	11.4	50.638	2.38e-99
Q3MIE0	Enoyl-CoA hydratase domain-containing protein 3, mitochondrial	Echdc3	6	22	32.385	1.33e-18
Q3MIE4		Vat1	6	19.6	43.118	2.61e-32
Q3T1J1;G3V7J7;D3ZWY2	Eukaryotic translation initiation factor 5A-1	Eif5a;Eif5a2	5	18.8	16.832	1.19e-22
Q3T1K5	F-actin-capping protein subunit alpha-2	Capza2	9	53.8	32.967	2.99e-202
Q3T1L0	Aldehyde dehydrogenase family 16 member A1	Aldh16a1	17	22.9	85.413	1.2e-129
Q497B0	Omega-amidase NIT2	Nit2	19	52.5	30.701	1.63e-302
Q499N6;D3ZK51	UBX domain-containing protein 1	Ubxn1	5	22.2	33.581	8.84e-20
Q499Q4;P38652;D3ZSP5	Phosphoglucomutase-1	Pgm1	13	27	61.389	1.51e-44
Q499R7		Ppa1	10	36.9	37.676	2.11e-155
Q4AEF8;D4A4V0	Coatomer subunit gamma	Copg	17	28.4	97.613	0
Q4FZT9	26S proteasome non-ATPase regulatory subunit 2	Psmd2	19	28	100.19	3.63e-259
Q4G079		Aimp1	7	33.3	34.574	1.6e-194
Q4KLL7		Vps4b	5	14.4	49.451	4.02e-99
Q4KLP0;D3ZZJ9;F1LQZ8	Probable 2-oxoglutarate dehydrogenase E1 component DHKTD1, mitochondrial	Dhtkd1;LOC100362392	6	9.1	102.64	3.88e-35
Q4KLZ6	Bifunctional ATP-dependent dihydroxyacetone kinase/FAD-AMP lyase (cyclizing);ATP-dependent dihydroxyacetone kinase;FAD-AMP lyase (cyclizing)	Dak	25	47.9	59.443	0
Q4KM62	Palmdelphin	Palmd	5	16.9	62.418	5.27e-21
Q4KM73;D3ZX23	UMP-CMP kinase	Cmpk1	11	66.3	22.169	8.54e-75
Q4KM74	Vesicle-trafficking protein SEC22b	Sec22b	10	55.8	24.74	2.89e-149
Q4V7E8;D3ZT35;D4A5G3;F1LVF2	Leucine-rich repeat flightless-interacting protein 2	Lrrfip2	4	11.4	49.772	2.37e-39
Q4V8H5		Dnpep	14	40.2	52.555	2.59e-234
Q4V8I5	ADP-ribosylation factor-like protein 6-interacting protein 4	Arl6ip4	4	26	25.769	6.16e-48
Q505J8	Phenylalanine--tRNA ligase alpha subunit	Farsa	14	31.5	57.719	0
Q562C4	Methyltransferase-like protein 7B	Mettl7b	10	33.6	27.904	8.58e-115
Q58FK9;G3V827;Q08415;Q08415-2;D4A0T4;D4A635;F1M572	Kynurenine--oxoglutarate transaminase 3	Ccbl2	10	26	51.044	1.12e-103
Q5BJN1		Stard10	4	19	32.904	1.43e-21
Q5BJN7;P62864	40S ribosomal protein S30	Fau	2	8.3	14.372	1.19e-08
Q5BJT0;D3ZE69	Arginine and glutamate-rich protein 1	Arglu1	11	29.9	32.887	3.42e-25
Q5BJZ3;D3ZBZ4		Nnt	3	3.3	113.87	5.75e-07
Q5D059;P61980	Heterogeneous nuclear ribonucleoprotein K	Hnrnpk	7	18.5	51.028	7.63e-182
Q5EBC0;D3ZFC6		Itih4	8	10.5	103.75	6.16e-33
Q5EBD0;Q99MS0	SEC14-like protein 2	Sec14l2	5	13.4	46.205	1.67e-19
Q5FVR5;D3ZYP4	Acyl-coenzyme A amino acid N-acyltransferase 2	Acnat2;Acnat1	7	22	46.01	3.38e-84
Q5FWT1	Protein FAM98A	Fam98a	2	5.2	55.07	2.57e-29
Q5HZE4	Methylthioribose-1-phosphate isomerase	Mri1	8	16.5	39.587	6.08e-30
Q5HZY2;Q6AY18	GTP-binding protein SAR1b	Sar1b;Sar1a	3	15.2	22.41	3.02e-07
Q5I0H9;F8WFV1	Protein disulfide-isomerase A5	Pdia5	4	9.7	59.399	3.28e-09
Q5I0M2	Nicotinate-nucleotide pyrophosphorylase [carboxylating]	Qprt	5	18.1	31.297	2.17e-36
Q5I0N4;Q62730	Estradiol 17-beta-dehydrogenase 2	Hsd17b2	2	7.6	42.039	5.92e-09
Q5M7U6;D3ZEA6;D3ZEF5	Actin-related protein 2	Actr2	13	37.6	44.733	2.06e-116
Q5M7V8;F1M3B8	Thyroid hormone receptor-associated protein 3	Thrap3	6	9.1	108.25	5.72e-23
Q5M849		Ifi35	5	20.6	31.764	1.54e-71
Q5M875;D3ZHH7;D4A675	17-beta-hydroxysteroid dehydrogenase 13	Hsd17b13	9	30.3	33.494	7.96e-100
Q5M884		Eci3	12	40.6	33.686	5.44e-71
Q5M9G3;D3ZG41	Caprin-1	Caprin1	8	13.4	78.12	8.66e-95
Q5M9H2;D3ZMF5;P45953	Very long-chain specific acyl-CoA dehydrogenase, mitochondrial	Acadvl	13	24.3	70.821	1.5e-127
Q5PPL3	Sterol-4-alpha-carboxylate 3-dehydrogenase, decarboxylating	Nsdhl	9	21.5	40.411	3.15e-35
Q5RJR8	Leucine-rich repeat-containing protein 59	Lrrc59	8	26.4	34.869	1.19e-36
Q5RK30	Ribosome maturation protein SBDS	Sbds	3	15.2	28.752	2.05e-120
Q5RKH2		Galk1	16	35.7	42.376	1.02e-221
Q5RKI0	WD repeat-containing protein 1	Wdr1	22	50.8	66.181	0
Q5RKI5		Flii	10	12.4	144.86	2.49e-67
Q5U2S0;Q5U2S0-2	UPF0471 protein C1orf63 homolog		2	7.7	34.516	2.68e-06
Q5U2S7;D4A341		Psmd3	21	37.2	60.687	0
Q5U2U5		Plin2	6	18.2	46.263	2.32e-42
Q5U2U8		Bag3	5	9.4	61.49	1.24e-39
Q5U300	Ubiquitin-like modifier-activating enzyme 1	Uba1	7	9.1	117.79	3.04e-16
Q5U302;D4A6H8		Ctnna1	13	21	100.24	2.87e-212
Q5XFW8	Protein SEC13 homolog	Sec13	4	15.8	35.547	4.22e-86
Q5XI32;D3ZPF3;D3Z8M9;F1M1E3	F-actin-capping protein subunit beta	Capzb	13	40.4	30.628	4.94e-122
Q5XI34;D4A1Y3;Q4QQT4		Ppp2r1a	13	25.3	65.322	2.31e-209
Q5XI55;Q5XI55-2;F1LLZ5	Peptide-N(4)-(N-acetyl-beta-glucosaminyl)asparagine amidase	Ngly1	9	14.6	74.676	3.51e-20
Q5XI81;F1LSD7;F1LZ14;F1M2C2;F1M3Y6;E9PSS4;Q80WE1;Q80WE1-2;E9PSS6;E9PTH3	Fragile X mental retardation syndrome-related protein 1	Fxr1;Fxr2	6	11.6	63.947	3.22e-23
Q5XIC1	Mannose-1-phosphate guanyltransferase alpha	Gmppa	5	13.3	46.191	1.08e-17
Q5XIC6;D3Z8B3;D3Z936		Psmd12	11	28.5	52.936	7.88e-126
Q5XIF6	Tubulin alpha-4A chain	Tuba4a	8	16.1	49.924	0
Q5XIH7;D4A278	Prohibitin-2	Phb2	7	26.4	33.312	6.36e-18
Q5XIM9	T-complex protein 1 subunit beta	Cct2	13	30.7	57.458	1.71e-121
Q60587	Trifunctional enzyme subunit beta, mitochondrial;3-ketoacyl-CoA thiolase	Hadhb	11	33.5	51.414	1.85e-66
Q62669		MGC72973	7	63.3	16.022	4.33e-90
Q62698;Q5D023	Cytoplasmic dynein 1 light intermediate chain 2	Dync1li2	3	8	54.744	1.54e-19
Q62991;D3ZNA2;D3ZYJ4;F1LT51	Sec1 family domain-containing protein 1	Scfd1	9	22.4	72.262	3.42e-111
Q63041	Alpha-1-macroglobulin;Alpha-1-macroglobulin 45 kDa subunit	A1m	19	14.3	167.12	6.37e-186
Q63081	Protein disulfide-isomerase A6	Pdia6	11	29.3	48.173	1.79e-145
Q63150	Dihydropyrimidinase	Dpys	15	35.5	56.814	1.34e-234
Q63228;D3ZTK6;F1LS90	Glia maturation factor beta	Gmfb	7	40.1	16.736	9.14e-86
Q63276	Bile acid-CoA:amino acid N-acyltransferase	Baat	16	48.6	46.464	0
Q63356;F1LS04;D4A7X9;F1M3K9	Unconventional myosin-Ie	Myo1e	4	3.8	126.83	1.98e-13
Q63357;D3ZKZ9;F1LQ75	Unconventional myosin-Id	Myo1d	22	29.3	116.09	4.47e-216
Q63396	Activated RNA polymerase II transcriptional coactivator p15	Sub1	8	51.2	14.441	2.83e-27
Q63570;F1LZ09	26S protease regulatory subunit 6B	Psmc4	22	49.8	47.408	1.23e-212
Q63584;F1LYL3;F1LWT3	Transmembrane emp24 domain-containing protein 10	Tmed10	4	21.5	24.857	3.31e-16
Q63610-2;Q63610-3;F2Z3T2		Tpm3	2	11.7	28.72	0
Q63610;F1LRP5;F1M931;Q9QX07	Tropomyosin alpha-3 chain	Tpm3	9	27.4	29.006	0
Q63692;F1LRF0;D3ZA91	Hsp90 co-chaperone Cdc37	Cdc37	6	22.7	44.51	3.75e-62
Q63716	Peroxiredoxin-1	Prdx1	13	50.3	22.109	3.73e-122
Q63798	Proteasome activator complex subunit 2	Psme2	3	16	26.857	3.52e-53
Q63910		LOC287167	4	36.6	15.524	1.19e-17
Q64057	Alpha-aminoadipic semialdehyde dehydrogenase	Aldh7a1	13	27.5	58.748	2.57e-49
Q641Y8	ATP-dependent RNA helicase DDX1	Ddx1	10	14.9	82.496	5.17e-126
Q641Z6;F8WFQ1;Q4V8H8	EH domain-containing protein 1	Ehd1	11	34.1	60.602	1.11e-245
Q64232	Trans-2,3-enoyl-CoA reductase	Tecr	4	8.1	36.122	5.15e-11
Q642E2;D3ZJD3;D3ZEI0;P17702;D3ZG08;D4A8B6;Q6TUD7	60S ribosomal protein L28	Rpl28;LOC100362069;LOC690096;RGD1565183	16	67.2	15.733	1.45e-126
Q64428;F1M9X9	Trifunctional enzyme subunit alpha, mitochondrial;Long-chain enoyl-CoA hydratase;Long chain 3-hydroxyacyl-CoA dehydrogenase	Hadha	22	27.7	82.664	4.13e-171
Q64550;Q6T5F2;Q6T5E8;Q6T5F0;Q6T5F1;Q6T5E7;Q6T5F3;F1MA28;P20720;Q64633;Q64637;Q64638;Q64634	UDP-glucuronosyltransferase 1-1;UDP-glucuronosyltransferase 1-2;UDP-glucuronosyltransferase 1-7;UDP-glucuronosyltransferase 1-3;UDP-glucuronosyltransferase 1-5;UDP-glucuronosyltransferase 1-8	Ugt1a1;Ugt1a2;Ugt1a7c;Ugt1a3;Ugt1a8;Ugt1a9;Ugt1	2	5	59.662	3.88e-19
Q64602	Kynurenine/alpha-aminoadipate aminotransferase, mitochondrial	Aadat	10	25.4	47.784	1.35e-102
Q64611;F1LPX2	Cysteine sulfinic acid decarboxylase	Csad	15	36.7	55.248	9.95e-86
Q64620	Serine/threonine-protein phosphatase 6 catalytic subunit	Ppp6c	3	10.8	35.159	6.76e-10
Q64640	Adenosine kinase	Adk	7	17.2	40.133	1.38e-26
Q66H80	Coatomer subunit delta	Arcn1	11	24.9	57.199	5.26e-41
Q66HA8;F8WFH0;F1M3G6;F1LRV4;O88600	Heat shock protein 105 kDa	Hsph1	12	16.7	96.417	1.66e-66
Q66HD0;Q66HD0-2;D3ZUA3	Endoplasmin	Hsp90b1	26	35.8	92.77	0
Q66HF3;Q6UPE1	Electron transfer flavoprotein-ubiquinone oxidoreductase, mitochondrial	Etfdh	5	8.6	68.163	1.02e-09
Q66HM2;P18484;D4A101	AP-2 complex subunit alpha-2	Ap2a2	13	15.2	104.17	4.41e-174
Q66X93;D4A8Y5;D3ZH86	Staphylococcal nuclease domain-containing protein 1	Snd1	11	17.3	101.95	1.67e-96
Q68FP2	Serum paraoxonase/lactonase 3	Pon3	3	10.7	39.458	2.47e-14
Q68FQ0	T-complex protein 1 subunit epsilon	Cct5	17	37.5	59.536	1.15e-201
Q68FR6;F1M5E1	Elongation factor 1-gamma	Eef1g	11	24	50.06	2.49e-33
Q68FS1	Cytosolic Fe-S cluster assembly factor NUBP2	Nubp2	3	13.3	28.926	1.06e-24
Q68FS4;Q68FS4-2	Cytosol aminopeptidase	Lap3	10	25	56.149	1.87e-56
Q68FT7		Farsb	8	14.9	65.651	1.3e-51
Q68FU3	Electron transfer flavoprotein subunit beta	Etfb	9	42.4	27.687	1.32e-46
Q68G19;P36511	UDP-glucuronosyltransferase 2B15	Ugt2b15	4	13.6	61.026	4.34e-33
Q68G31	Phenazine biosynthesis-like domain-containing protein	Pbld	14	56.6	31.687	5.7e-288
Q6AXS5;Q6AXS5-2	Plasminogen activator inhibitor 1 RNA-binding protein	Serbp1	9	26.3	44.754	2.15e-100
Q6AXW2;P70566		Tmod3	18	54.8	39.471	0
Q6AY30;D4A8I1	Saccharopine dehydrogenase-like oxidoreductase	Sccpdh	3	8.2	47.088	2.94e-06
Q6AY58		Bcap31	4	11	27.911	8.89e-10
Q6AYB5;F1M7P5	Signal recognition particle 54 kDa protein	Srp54;LOC100359558	4	15.7	55.704	2.42e-125
Q6AYD3		Pa2g4	5	16.5	43.656	2.24e-54
Q6AYD5		Gspt1	6	9.7	68.751	5.81e-26
Q6AYH5	Dynactin subunit 2	Dctn2	12	43	44.147	2.2e-165
Q6AYI1;D4A9J1		Ddx5	19	30.7	69.238	3.78e-166
Q6AYS7;Q6PTT0	Aminoacylase-1A	Acy1a	12	30.9	45.804	1.6e-50
Q6AYS8	Estradiol 17-beta-dehydrogenase 11	Hsd17b11	3	15.1	32.937	4.38e-14
Q6AYT3	tRNA-splicing ligase RtcB homolog		18	41	55.249	1.51e-293
Q6AYW2;P04176	Phenylalanine-4-hydroxylase	Pah	26	56.3	51.819	0
Q6DGG1;F1M2R0;F1M5R3	Abhydrolase domain-containing protein 14B	Abhd14b	9	46.2	22.618	1.68e-178
Q6I7R1		Dhrs7	3	9.3	36.402	2.81e-56
Q6IMY8		Hnrnpu	14	18.5	87.731	6.41e-175
Q6IN39;P97852	Peroxisomal multifunctional enzyme type 2;(3R)-hydroxyacyl-CoA dehydrogenase;Enoyl-CoA hydratase 2	Hsd17b4	23	34	81.088	6.78e-215
Q6MG08;F1LQF0	ATP-binding cassette sub-family F member 1	Abcf1	4	8.6	95.251	5.1e-155
Q6MG49;D3ZX75;Q6MG49-2	Large proline-rich protein BAG6	Bag6	20	23.2	120.01	5.94e-130
Q6P0K8	Junction plakoglobin	Jup	15	23	81.8	4.23e-44
Q6P3V8		Eif4a1	11	26.1	46.153	0
Q6P3V9;P50878	60S ribosomal protein L4	Rpl4	32	51.8	47.3	0
Q6P502;F1M1I0	T-complex protein 1 subunit gamma	Cct3	27	53.8	60.646	3.32e-290
Q6P685;D3ZBJ7		Eif2s2	4	11.4	38.243	8.31e-14
Q6P6U2;Q63569;D3ZF94;D3ZL65	26S protease regulatory subunit 6A	Psmc3	24	56.1	49.548	2.31e-255
Q6P7B0;F8WFH8	Tryptophan--tRNA ligase, cytoplasmic;T1-TrpRS;T2-TrpRS	Wars	7	22.7	54.143	1.35e-171
Q6P7R8;D3ZPU3	Estradiol 17-beta-dehydrogenase 12	Hsd17b12	6	18.3	34.84	1.31e-15
Q6P9V7;Q63797;F1M0Q8;F1M5C5	Proteasome activator complex subunit 1	Psme1	4	18.9	28.635	1.35e-38
Q6PCT9		Psmd6	7	21.6	45.598	1.22e-71
Q6PDV7;D4A1P2;D3ZXN2	60S ribosomal protein L10	Rpl10;Rpl10l	21	67.8	24.604	2.62e-185
Q6PDV8;F1M3S4;D3ZSC4;P47198		LOC100363800;LOC100360057	6	30.5	14.759	2.91e-60
Q6PDW1;D3ZMD2;D3ZHB3;D3ZJZ4;P63324;F1M185;D3ZG05;D3ZV36;F1M8X3	40S ribosomal protein S12	LOC100359593;LOC100360558;LOC100360573;LOC100360642;Rps12	8	57.6	14.515	5.29e-63
Q6Q0N1;F1LUD0	Cytosolic non-specific dipeptidase	Cndp2	8	19.2	52.693	5.12e-32
Q6QI09;Q6PCU0;P35435	ATP synthase gamma chain;ATP synthase subunit gamma, mitochondrial	LOC100360100;Atp5c1	10	15.8	67.72	3.5e-101
Q6T487;Q9Z1P2;Q6GMN8;F1M1N4	Alpha-actinin-1	Actn1	6	10	105.47	3.82e-148
Q6TMG5;F1LM08	NF-kappa-B essential modulator	Ikbkg	6	13.3	48.066	1.96e-32
Q6TXG7;Q4KLG7	Serine hydroxymethyltransferase	Shmt1	18	29.1	75.373	5.9e-198
Q71TY3;D3ZNZ8	40S ribosomal protein S27	Rps27;LOC100362405	3	15.5	9.461	3.22e-34
Q75N33;D3ZUF6;F1LNQ6;D4AAW2	Protein transport protein Sec16B	Sec16b	15	20.6	116.9	5.9e-105
Q793F9;Q6IRG3;Q6GX84	Vacuolar protein sorting-associated protein 4A	Vps4a	6	16.9	48.906	8.56e-31
Q794E4;F1LV61	Heterogeneous nuclear ribonucleoprotein F;Heterogeneous nuclear ribonucleoprotein F, N-terminally processed	Hnrnpf	4	13	45.729	1.08e-73
Q7M0E3;D4A315	Destrin	Dstn	6	35.8	18.533	6.52e-140
Q7TP08;G3V8F9;P70473	Alpha-methylacyl-CoA racemase	Amacr	4	10.1	49.884	9.41e-11
Q7TP42		Sec62	7	6.8	67.93	4.86e-22
Q7TP52	Carboxymethylenebutenolidase homolog	Cmbl	3	14.7	27.903	8.76e-20
Q7TP57;F1M9D6;F1M4K4		Stat4	24	23.9	134.61	0
Q7TPB1	T-complex protein 1 subunit delta	Cct4	15	36.5	58.099	3.89e-109
Q7TPJ1;A1L1K2		Igtp	13	16.1	161.63	2.38e-152
Q80Z29;D4A8T1;G8JLR4	Nicotinamide phosphoribosyltransferase	Nampt	25	45.2	55.437	0
Q8CG45	Aflatoxin B1 aldehyde reductase member 2	Akr7a2	12	35.1	40.675	1.16e-51
Q8CHM7;F1M6X0	2-hydroxyacyl-CoA lyase 1	Hacl1	13	28.4	63.615	1.64e-208
Q8R491;Q8R3Z7	EH domain-containing protein 3	Ehd3	10	28.2	60.79	9e-236
Q8SEZ5;P00406	Cytochrome c oxidase subunit 2	Mt-co2;Mtco2	4	19.4	25.928	8.85e-16
Q8VBU2;Q8VBU2-2	Protein NDRG2	Ndrg2	9	38.8	40.779	8.51e-171
Q8VIF7;F1LRJ9	Selenium-binding protein 1	Selenbp1	17	48.5	52.531	3.3e-100
Q920J4;D3ZW98	Thioredoxin-like protein 1	Txnl1	7	38.1	32.249	1.79e-105
Q920P0	L-xylulose reductase	Dcxr	7	35.2	25.719	9.5e-43
Q920R3	Fatty acid desaturase 1	Fads1	5	14.8	52.481	4.04e-19
Q923K9;Q923K9-2;F1LNL0;Q923K9-3;Q923K9-4;Q66H68;D3ZAE2	APOBEC1 complementation factor	A1cf	15	41.4	65.619	5.35e-152
Q99J82	Integrin-linked protein kinase	Ilk	13	27.7	51.373	3.39e-49
Q99MI5		Srm	3	13.9	33.997	1.91e-61
Q99ND5;P49890	Estrogen sulfotransferase, isoform 6	ste2	2	12.9	35.361	4.98e-41
Q99ND8;D3ZLY2;P35815-2;D3ZAK9;Q642F2;P35815;P20650	Protein phosphatase 1B;Protein phosphatase 1A	Ppm1b;Ppm1a	3	6.5	51.009	1.03e-09
Q99PD4;D4A992;D3ZXP7	Actin-related protein 2/3 complex subunit 1A	Arpc1a	9	31.1	41.599	8.92e-75
Q9EPH8;B5DF80;G3V9N0;D3ZSR2;D4AC14;D4A233;F1M8Y9	Polyadenylate-binding protein 1	Pabpc1;Pabpc3	3	6.6	70.7	4.43e-33
Q9EPJ0	Nuclear ubiquitous casein and cyclin-dependent kinases substrate	Nucks1	3	5.3	27.14	2.05e-09
Q9EQ76;Q8K4B7;G3V6F2	Dimethylaniline monooxygenase [N-oxide-forming] 3	Fmo3	16	29.8	59.96	2.23e-61
Q9ES38	Bile acyl-CoA synthetase	Slc27a5	20	27.5	76.265	8.14e-196
Q9JHL4;Q9JHL4-2;Q9JHL4-3;Q9JHL4-4	Drebrin-like protein	Dbnl	8	26.4	48.612	2.15e-155
Q9JJ19	Na(+)/H(+) exchange regulatory cofactor NHE-RF1	Slc9a3r1	8	28.9	38.83	1.43e-32
Q9JKB7;Q9WTT6	Guanine deaminase	Gda	14	37.9	50.9	6.3e-192
Q9JMB5;D3ZS63	Proteasomal ubiquitin receptor ADRM1	Adrm1	2	7.6	42.102	2.34e-28
Q9QUH3	Apolipoprotein A-V	Apoa5	6	28.1	41.426	3.67e-87
Q9QXQ0;Q8R4I6;D3ZCV0	Alpha-actinin-4	Actn4	23	34.7	104.91	0
Q9QYU4	Thiomorpholine-carboxylate dehydrogenase	Crym	7	25.9	33.554	1.03e-58
Q9QZA2;F1LLY4	Programmed cell death 6-interacting protein	Pdcd6ip	24	32.6	96.63	6.91e-135
Q9QZU7	Gamma-butyrobetaine dioxygenase	Bbox1	6	14	44.545	8.17e-20
Q9R063;D3ZEN5;Q9R063-2	Peroxiredoxin-5, mitochondrial	Prdx5	6	35.7	22.178	4.98e-11
Q9R0T3	DnaJ homolog subfamily C member 3	Dnajc3	7	16.5	57.56	1.98e-25
Q9WU82	Catenin beta-1	Ctnnb1	6	12	85.454	4.57e-35
Q9WUC4	Copper transport protein ATOX1	Atox1	2	32.4	7.2924	2.15e-12
Q9WVJ6		Tgm2	24	37.2	76.934	5.08e-259
Q9WVK3	Peroxisomal trans-2-enoyl-CoA reductase	Pecr	8	36.3	32.433	4.73e-51
Q9WVK7	Hydroxyacyl-coenzyme A dehydrogenase, mitochondrial	Hadh	5	11.8	34.447	6.25e-08
Q9Z122;F1LNU6	Fatty acid desaturase 2	Fads2	6	17.3	52.38	8.62e-19
Q9Z270;Q9Z269	Vesicle-associated membrane protein-associated protein A	Vapa	5	20.9	27.841	3.74e-14
Q9Z2L0;D3Z9A9;F1LV63	Voltage-dependent anion-selective channel protein 1	Vdac1	5	23.3	30.755	2.62e-11
Q9Z2M4	Peroxisomal 2,4-dienoyl-CoA reductase	Decr2	4	10.6	31.292	1.81e-48
Q9Z339;Q6AXR6;D3ZJM9;Q6AXV9	Glutathione S-transferase omega-1	Gsto1	8	35.7	27.669	5.88e-71
